# Supplementary material for: Synergistic HNO3–H2SO4–NH3 upper tropospheric particle formation
Source: Nature. 2022 May 18;605(7910):483–9. doi: 10.1038/s41586-022-04605-4 (PMC9117139; doi:10.1038/s41586-022-04605-4)
Supplement: Supplementary file 3 — Source Data Fig. 2 [file 41586_2022_4605_MOESM3_ESM.xlsx]

## Sheet: JvsNH3
NH3 conc. (cm^-3)	J_1.7_HNO3-NH3 (cm^-3 s^-1)		NH3 conc. (cm^-3)	J_1.7_H2SO4-NH3 (cm^-3 s^-1)		NH3 conc. (cm^-3)	J_1.7_HNO3-H2SO4-NH3 (cm^-3 s^-1)
625100000	0.285192		6580000	0.0133171		175357000	11.3627
			16450000	0.0699674		244447000	41.1575
			32900000	0.233411		303338000	61.6605
			65800000	0.730044		355320000	64.407
			164500000	2.88789		398090000	98.1613
			329000000	7.32807		434280000	184.375
			658000000	17.0248		467180000	244.813
			1645000000	44.9241		493500000	252.058
			3290000000	81.2382		516530000	294.454
						536270000	382.245
