# Supplementary material for: Synergistic HNO3–H2SO4–NH3 upper tropospheric particle formation
Source: Nature. 2022 May 18;605(7910):483–9. doi: 10.1038/s41586-022-04605-4 (PMC9117139; doi:10.1038/s41586-022-04605-4)
Supplement: Supplementary file 7 — Source Data Extended Data Fig. 2 [file 41586_2022_4605_MOESM7_ESM.xlsx]

## Sheet: a
Time (min)	N_1.7_meas (cm^-3)	N_2.5_meas (cm^-3)
-10.4667	1.47838	1.16
-9.45	1.37236	1.16
-8.45	1.28635	1.16
-7.43333	1.26666	1.16
-6.43333	1.26666	1.16
-5.56667	1.26666	1.16
-4.56667	1.26666	1.16
-3.55	1.26666	1.15999
-2.55	1.29327	1.15999
-1.53333	1.31989	0.579994
-0.533333	1.33008	1.15999
0.483333	1.33008	0.579994
1.48333	1.33008	0.579994
2.5	1.33008	0.58
3.5	1.33008	0.58
4.51667	1.30498	0.58
5.51667	1.26102	1.15999
6.53333	1.21707	0.580006
7.53333	1.19467	5.85e-06
8.55	1.19467	0.580006
9.55	1.19467	0.580006
10.5667	1.19467	0.580006
11.5667	1.19467	0.580006
12.4333	1.21808	1.16
13.4333	1.26571	1.16
14.45	1.31334	1.16
15.45	1.36358	0.58
16.4667	1.42065	0.58
17.4667	1.48191	0.58
18.4833	1.54318	0.58
19.4833	1.5928	0
20.5	1.61204	0.58
21.5	1.61253	0
22.5167	1.61303	0
23.5167	1.65243	0
24.5333	1.79333	0
25.5333	1.99682	0
26.55	2.20031	0
27.55	2.47168	0
28.5667	2.92011	0
29.5667	3.47774	0
30.4333	4.03536	0
31.4333	4.39153	0
32.45	4.49685	0
33.45	4.55275	0
34.4667	4.60866	0
35.4667	4.64131	0
36.4833	4.92198	0
37.4833	5.47394	0
38.5	6.0259	0
39.5	6.55697	0
40.5167	7.03355	0
41.5167	7.47652	0
42.5333	7.9195	0
43.5333	8.35009	0
44.55	8.74836	0
45.55	9.12671	0
46.5667	9.50507	0
47.5667	10.0251	0
48.4333	10.9147	0
49.4333	12.0323	0
50.45	13.1498	0
51.45	13.9542	0
52.4667	14.2035	0
53.4667	14.2353	0
54.4833	14.2673	0
55.4833	14.2955	0
56.5	14.3312	0
57.5	14.3312	0
58.5167	14.3782	0
59.5167	14.6266	0
60.5333	15.3369	0
61.5333	16.332	0
62.55	17.3271	0
63.55	18.1623	0
64.5667	18.5804	0
65.5667	18.7413	0
66.4333	18.9023	0
67.4333	19.0861	0
68.45	19.3298	0
69.45	19.6103	0
70.4667	19.8908	0
71.4667	20.2979	0
72.4833	21.035	0
73.4833	21.9757	0
74.5	22.9165	0
75.5	23.9273	0
76.5167	25.1209	0
77.5167	26.4273	0
78.5333	27.7336	0
79.5333	31.7933	0
80.55	43.0355	0
81.55	58.707	0
82.5667	74.3784	0.58
83.5667	750.186	4.06
84.4333	3148.09	19.715
85.4333	6607.95	92.325
86.45	10067.8	509.69
87.45	15404	3395.1
88.4667	25635	8662
89.4667	38884.5	15595.5
90.4833	52134	20835
91.4833	67080.9	24755
92.5	86456.2	36550
93.5	108562	45805
94.5167	130668	52110
95.5167	148765	58585
96.5333	156403	60015
97.5333	157592	63870
98.55	158781	69708.3
99.55	159884	73858.3
100.567	159884	76230

## Sheet: b
Time (min)	J_1.7_meas (cm^-3 s^-1)
-10.4667	0.001315
-9.45	0.001315
-8.45	0.001315
-7.43333	0.001485
-6.43333	0.00212
-5.56667	0.00212
-4.56667	0.00212
-3.55	0.00212
-2.55	0.00212
-1.53333	0.00196
-0.533333	0.001455
0.483333	0.0009575
1.48333	0.000555
2.5	0.000555
3.5	0.000555
4.51667	0.000555
5.51667	0.000555
6.53333	0.000595
7.53333	0.0006935
8.55	0.0008025
9.55	0.000853
10.5667	0.0012465
11.5667	0.00164
12.4333	0.0017
13.4333	0.001775
14.45	0.00179
15.45	0.001865
16.4667	0.00194
17.4667	0.00204
18.4833	0.00226
19.4833	0.002465
20.5	0.00255
21.5	0.002565
22.5167	0.002755
23.5167	0.0044
24.5333	0.006325
25.5333	0.00746
26.55	0.00864
27.55	0.009025
28.5667	0.009025
29.5667	0.009025
30.4333	0.009025
31.4333	0.00987
32.45	0.01185
33.45	0.01225
34.4667	0.01225
35.4667	0.01225
36.4833	0.01225
37.4833	0.0139
38.5	0.014
39.5	0.0141
40.5167	0.0141
41.5167	0.0141
42.5333	0.0141
43.5333	0.0141
44.55	0.0141
45.55	0.0141
46.5667	0.0153
47.5667	0.01705
48.4333	0.01705
49.4333	0.01705
50.45	0.01705
51.45	0.01705
52.4667	0.01555
53.4667	0.0135
54.4833	0.0135
55.4833	0.0135
56.5	0.0135
57.5	0.0135
58.5167	0.015
59.5167	0.0193
60.5333	0.02045
61.5333	0.02045
62.55	0.0207
63.55	0.02095
64.5667	0.0217
65.5667	0.02145
66.4333	0.02145
67.4333	0.02145
68.45	0.02145
69.45	0.02145
70.4667	0.0228
71.4667	0.0266
72.4833	0.03175
73.4833	0.03475
74.5	0.0362
75.5	0.03885
76.5167	0.04235
77.5167	0.04475
78.5333	0.06845
79.5333	0.1548
80.55	0.261
81.55	0.318
82.5667	5.866
83.5667	26.3
84.4333	51.45
85.4333	63.05
86.45	81.3
87.45	141.1
88.4667	214.5
89.4667	248.5
90.4833	273
91.4833	273
92.5	273
93.5	273
94.5167	273
95.5167	270.5
96.5333	194.5
97.5333	141.5
98.55	141
99.55	138.5
100.567	136

## Sheet: c
d N/d logd_p (cm^-3)
d_p (nm) Time (min)	4	4.14	4.29	4.45	4.61	4.78	4.96	5.14	5.33	5.52	5.73	5.94	6.15	6.38	6.61	6.85	7.1	7.37	7.64	7.91	8.2	8.51	8.82	9.14	9.47	9.82	10.2	10.6	10.9	11.3	11.8	12.2	12.6	13.1	13.6	14.1	14.6	15.1	15.7	16.3	16.8	17.5	18.1	18.8	19.5	20.2	20.9	21.7	22.5
-10.2333	0	0	0	0	0	0	0	0	0	0	0	0	0	0	0	0	0	0	0	0	0	0	0	0	0	0	0	0	0	0	0	0	0	0	0	0	0	0	0	0	0	0	0	0	0	0	0	0	0
-9.31667	0	0	0	0	0	0	0	0	0	0	0	0	0	0	0	0	0	0	0	0	0	0	0	0	0	0	0	0	0	0	0	0	0	0	0	0	0	0	0	0	0	0	0	0	0	0	0	0	0
-8.4	0	0	0	0	0	0	0	0	0	0	0	0	0	0	0	0	0	0	0	0	0	0	0	0	0	0	0	0	0	0	0	0	0	0	0	0	0	0	0	0	0	0	0	0	0	0	0	0	0
-7.48333	0	0	0	0	0	0	0	0	0	0	0	0	0	0	0	0	0	0	0	0	0	0	0	0	0	0	0	0	0	0	0	0	0	0	0	0	0	0	285.43	0	0	0	0	0	0	0	0	0	0
-6.56667	0	0	0	0	0	0	0	0	0	0	0	0	0	0	0	0	0	0	0	0	0	0	0	0	0	0	0	0	0	0	413.332	0	0	0	0	0	0	0	0	0	0	0	0	0	0	0	0	0	0
-5.65	0	0	0	0	0	0	0	0	0	0	0	0	0	0	0	0	0	0	0	0	0	0	0	0	0	0	0	0	0	0	0	0	0	0	0	0	0	0	0	0	0	0	0	0	0	0	0	0	0
-4.73333	0	0	0	0	0	0	0	0	0	0	0	0	0	0	0	0	0	3349	789.942	0	0	0	0	0	0	0	0	0	0	0	0	0	0	0	0	0	0	0	0	0	0	0	0	0	0	0	0	0	0
-3.65	0	0	0	0	0	0	0	0	0	0	0	0	0	0	0	0	0	0	0	0	0	0	0	0	0	0	0	0	0	0	0	0	0	0	0	0	0	0	0	0	0	0	0	0	0	0	0	0	0
-2.73333	0	0	0	0	0	0	0	0	0	0	0	0	0	0	0	0	0	0	0	0	0	0	0	0	0	0	0	0	0	0	0	0	0	0	0	0	0	0	0	0	0	0	0	0	0	0	0	0	0
-1.81667	0	0	0	0	0	0	0	0	0	0	0	0	0	0	0	0	0	0	0	0	0	0	0	0	0	0	0	0	0	0	0	0	0	0	0	0	0	0	0	0	0	0	0	0	0	0	0	0	0
-0.9	0	0	0	0	0	0	0	0	0	0	0	0	0	0	0	0	0	0	0	0	0	0	0	0	0	0	0	0	0	0	0	0	0	357.853	0	0	0	0	0	0	0	0	0	0	0	0	0	0	0
0.0166667	0	0	0	0	0	0	0	0	0	0	0	0	0	0	0	0	0	0	0	0	0	0	0	0	0	0	0	0	0	0	0	0	0	0	0	0	0	0	0	0	0	0	0	0	0	0	0	0	0
0.933333	0	0	0	0	0	0	0	0	0	0	0	0	0	0	0	0	0	0	0	0	0	0	0	0	0	0	0	0	0	0	0	0	0	0	0	0	0	0	0	0	0	0	0	0	0	0	0	0	0
1.85	0	0	0	0	0	0	0	0	0	0	0	0	0	0	0	0	0	0	0	0	0	0	0	0	0	0	0	0	0	0	0	0	0	0	0	0	0	0	0	0	0	0	0	0	0	0	0	0	0
2.76667	0	0	0	0	0	0	0	0	0	0	0	0	0	0	0	0	0	0	0	0	0	0	0	0	0	0	0	0	0	0	0	0	0	0	0	0	0	0	0	0	0	0	0	0	0	0	0	0	0
3.68333	0	0	0	0	0	0	0	0	0	0	0	0	0	0	0	0	0	0	0	0	0	0	0	0	0	0	0	0	0	0	0	0	0	0	0	0	0	0	0	0	0	0	0	0	0	0	0	0	0
4.6	0	0	0	0	0	0	0	0	0	0	0	0	0	0	0	0	0	0	0	0	0	0	0	0	0	0	0	0	0	0	0	0	0	0	0	0	0	0	0	0	0	0	0	0	0	0	0	0	0
5.51667	0	0	0	0	0	0	0	0	0	0	0	0	0	0	0	0	0	0	0	0	0	0	0	0	0	0	0	0	0	0	0	0	0	0	0	0	0	0	0	0	0	0	0	0	0	0	0	0	0
6.43333	0	0	0	0	0	0	0	0	0	0	3925.17	0	0	0	0	0	0	0	0	0	0	0	0	0	0	0	0	0	0	0	0	0	0	0	0	0	0	0	0	0	0	0	0	0	0	0	0	0	0
7.35	0	0	0	0	0	0	0	0	0	0	0	0	0	0	0	0	0	0	0	0	0	0	0	0	0	0	0	0	0	0	0	0	0	0	0	0	0	0	0	0	0	0	0	0	0	0	0	0	0
8.26667	0	0	0	0	0	0	0	0	0	0	0	0	0	0	0	0	0	0	0	0	0	0	0	0	0	0	0	0	0	0	0	0	0	0	0	0	0	0	158.393	121.681	0	0	0	0	0	0	0	0	0
9.18333	0	0	0	0	0	0	0	0	0	0	0	0	0	0	0	0	0	0	0	0	0	0	0	0	0	0	0	0	0	0	0	0	0	0	0	0	0	0	0	0	0	0	0	0	0	0	0	0	0
10.1	0	0	0	0	0	0	0	0	0	0	0	0	0	0	0	0	0	0	0	0	0	0	0	0	0	0	0	0	0	0	0	0	0	0	0	0	0	0	0	0	0	0	0	0	0	0	0	0	0
11.0167	0	0	0	0	0	0	0	0	0	0	0	0	0	0	0	0	0	0	0	0	0	0	0	0	0	0	0	0	0	0	0	0	0	0	0	0	0	0	0	0	0	0	0	0	0	0	0	0	0
11.9333	0	0	0	0	0	0	0	1633.34	0	0	0	0	0	0	1006.79	0	0	0	0	0	0	0	0	0	0	0	0	0	0	0	0	0	0	0	0	0	0	0	0	0	0	0	0	0	0	0	0	0	0
12.85	0	0	0	0	0	0	0	0	0	0	0	0	0	0	0	0	0	0	0	0	0	0	0	0	0	0	0	0	0	0	0	0	0	0	0	0	0	0	0	0	0	0	0	0	0	0	0	0	0
13.7667	0	0	0	0	0	0	0	0	0	0	0	0	0	0	0	0	0	0	0	0	0	0	0	0	0	0	0	0	0	0	0	0	0	0	0	0	0	0	0	0	0	0	0	0	0	0	0	0	0
14.6833	0	0	0	0	0	0	0	0	0	0	0	0	0	0	0	0	0	0	0	0	0	0	0	0	0	0	0	0	0	0	0	0	0	0	0	0	0	0	0	0	0	0	0	0	0	0	0	0	0
15.6	0	0	0	0	0	0	0	0	0	0	0	0	0	0	0	0	0	0	0	0	0	0	0	0	0	0	0	0	0	0	0	0	0	0	0	0	0	0	0	0	0	0	0	0	0	0	0	0	0
16.5167	0	0	0	0	0	0	0	0	0	0	0	0	0	0	0	0	0	0	0	0	0	0	0	0	0	0	0	0	0	0	0	0	0	0	0	0	0	0	285.44	0	0	0	0	0	0	0	0	0	0
17.4333	0	0	0	0	0	0	0	0	0	0	0	0	0	0	0	0	0	0	0	0	0	0	0	0	0	0	0	0	0	0	0	0	0	0	0	0	0	0	0	0	0	0	0	0	0	0	0	0	0
18.35	0	0	0	0	0	0	0	0	0	0	0	0	0	0	0	0	0	0	0	0	0	0	0	0	0	0	0	0	0	0	0	0	0	0	0	0	0	0	0	0	0	0	0	0	0	0	0	0	0
19.2667	0	0	0	0	0	0	0	0	0	0	0	0	0	0	0	0	0	0	0	0	0	0	0	0	0	0	0	0	0	0	0	0	0	0	0	0	0	0	0	0	0	0	0	0	0	0	0	0	0
20.1833	0	0	0	0	0	0	0	0	0	0	0	0	0	0	0	0	0	0	0	0	0	0	0	0	0	0	0	0	0	0	0	0	0	0	0	0	0	0	0	0	0	0	0	0	0	0	0	0	0
21.1	0	0	0	0	0	0	0	0	0	0	0	0	0	0	0	0	0	0	0	0	0	0	0	0	0	0	0	0	0	0	0	0	0	0	0	0	0	0	0	0	0	0	0	0	0	0	0	0	0
22.0167	0	0	0	0	0	0	0	0	0	0	0	0	0	3225.19	0	0	0	0	0	0	0	0	0	0	0	0	0	0	0	0	0	0	0	0	0	0	0	0	0	0	0	0	0	0	0	0	206.274	0	0
22.9333	0	0	0	0	0	0	0	0	0	0	0	0	0	0	0	0	0	0	0	0	0	0	0	0	0	0	0	0	0	0	0	0	0	0	0	0	0	0	0	0	0	0	0	0	0	0	0	0	0
23.85	0	0	0	0	0	0	0	0	0	0	0	0	0	0	0	0	0	0	0	0	0	0	0	0	0	0	0	0	0	0	0	0	0	0	682.443	0	0	0	0	0	0	0	0	0	0	0	0	0	0
24.7667	0	0	0	0	0	0	0	0	0	0	0	0	0	0	0	0	0	0	0	0	0	663.747	628.468	0	563.747	0	0	0	0	0	0	0	0	0	0	326.072	0	0	0	0	0	0	0	0	0	0	0	0	0
25.6833	0	0	0	0	0	0	0	0	0	0	0	0	0	0	0	0	0	0	0	0	0	0	1256.94	0	0	0	0	0	0	0	0	0	0	0	0	0	0	0	0	0	0	0	0	0	0	0	0	0	0
26.6	0	0	0	0	0	0	0	0	0	0	0	0	0	0	0	0	0	0	0	0	0	0	0	0	0	0	0	0	0	0	0	0	0	0	0	0	0	0	0	0	0	0	0	0	0	0	0	0	0
27.5167	0	0	0	0	0	0	0	0	0	0	0	0	0	0	0	0	0	0	0	0	0	0	0	0	0	0	0	1920.47	0	0	0	0	0	0	0	0	0	298.187	570.873	0	0	0	0	0	0	0	0	0	0
28.4333	0	2771.75	0	0	0	0	0	0	0	0	0	0	1147.94	0	0	0	0	0	0	0	0	0	0	0	0	0	0	0	0	0	0	0	0	0	0	0	0	0	0	0	0	0	0	231.615	0	0	0	0	0
29.35	0	0	0	0	0	0	0	0	0	0	0	0	0	0	0	0	0	0	0	0	1409.19	0	0	0	0	0	0	480.112	0	0	0	0	0	0	0	0	0	0	0	0	1048.88	251.176	0	0	0	0	0	0	0
30.2667	0	0	0	0	0	0	0	0	0	0	0	0	0	1075.05	0	0	0	0	0	0	1409.19	0	0	0	0	0	0	0	0	0	0	0	0	0	0	1630.34	311.739	0	0	0	262.219	0	0	0	0	0	0	0	0
31.1833	0	0	0	0	0	0	0	0	0	0	0	0	0	0	0	0	0	0	0	0	0	0	0	0	0	0	0	0	0	868.927	0	0	0	0	0	0	0	0	0	0	0	0	0	0	0	0	0	0	0
32.1	3049.25	0	0	0	0	0	0	0	0	0	0	0	0	0	0	0	0	0	0	0	0	0	0	0	0	0	0	0	0	0	0	0	0	0	0	0	0	0	0	0	0	0	0	0	0	0	0	0	0
33.0167	0	0	0	0	0	0	0	0	0	0	0	0	0	0	0	0	0	0	0	745.312	0	0	0	0	0	0	0	0	0	0	0	0	0	0	0	0	0	0	0	0	0	0	0	0	0	0	0	0	0
33.9333	0	0	0	0	0	0	0	0	0	0	0	0	0	0	0	0	0	0	0	0	0	663.741	0	0	0	0	0	0	0	0	0	0	0	0	0	0	0	0	0	0	0	0	0	0	0	0	0	0	0
34.85	0	0	0	0	0	0	0	0	0	0	0	0	0	0	0	0	0	0	0	0	0	0	0	0	0	0	506.235	0	0	0	0	0	0	0	0	0	0	298.187	0	273.382	0	0	0	0	0	0	0	0	0
35.7667	0	0	0	0	0	0	0	0	0	0	0	0	0	0	0	0	0	0	0	0	0	663.747	0	0	0	0	0	0	0	0	0	0	0	0	0	0	0	0	0	0	0	0	0	0	0	0	0	0	0
36.6833	0	0	0	0	0	0	0	0	0	0	0	0	0	0	0	0	0	0	0	0	0	0	0	0	0	0	0	0	0	0	0	0	0	0	0	0	0	0	0	0	0	0	0	0	0	0	0	0	0
37.6	0	0	0	0	0	0	0	0	0	0	0	0	0	0	0	0	0	0	0	0	0	0	0	0	0	0	0	0	0	0	0	0	0	0	0	0	0	0	0	0	0	0	0	0	0	0	0	0	0
38.5167	0	0	0	0	0	0	0	0	0	0	0	0	0	0	0	0	0	0	0	0	0	0	0	0	0	0	0	0	0	0	0	0	0	0	0	0	0	0	0	0	262.222	0	0	0	0	0	0	0	0
39.4333	0	0	0	0	0	0	0	0	0	0	0	0	0	0	0	0	0	0	0	0	0	0	0	0	0	0	0	0	0	0	0	0	0	0	0	0	0	0	0	0	0	0	0	0	0	0	0	0	0
40.35	0	0	0	0	0	0	0	0	0	0	0	0	0	0	0	0	0	0	0	0	0	0	0	0	0	0	506.241	0	0	0	0	0	0	0	0	0	0	0	0	0	0	0	0	0	0	0	0	0	0
41.2667	0	0	0	0	0	0	0	0	0	0	0	0	0	0	0	0	0	0	0	0	0	0	0	0	0	0	0	0	0	0	0	0	0	0	0	0	0	0	0	0	0	0	0	0	0	0	0	0	0
42.1833	0	0	0	0	0	0	0	0	0	0	0	0	0	0	0	0	0	0	0	0	0	0	0	0	0	0	0	0	0	0	0	0	0	0	0	0	0	0	0	0	0	0	0	0	0	0	0	0	0
43.1	0	0	0	0	0	0	0	0	0	0	0	0	0	0	0	0	0	0	0	0	0	0	0	0	0	0	0	0	0	0	0	0	0	0	0	0	0	0	0	0	0	0	0	0	0	0	0	0	0
44.0167	0	0	0	0	0	0	0	0	0	0	0	0	0	0	0	0	0	0	0	0	0	0	0	0	0	0	0	0	0	0	0	0	0	0	0	0	0	0	0	0	0	0	0	0	0	0	0	0	0
44.9333	0	0	0	0	0	0	0	0	0	0	0	0	0	0	0	0	0	0	0	0	0	0	0	0	0	0	0	0	0	0	0	0	0	0	0	0	0	0	0	0	0	0	0	0	0	0	0	0	0
45.85	0	0	0	0	0	0	0	0	0	0	0	0	0	0	0	0	0	0	0	0	0	0	0	0	0	0	0	0	0	0	0	0	0	0	0	0	0	0	0	0	0	0	0	0	0	0	0	0	0
46.7667	0	0	0	0	0	0	0	0	0	0	0	0	0	0	0	0	0	0	0	0	0	0	0	0	0	0	0	0	0	0	0	0	0	0	0	0	0	0	0	0	0	0	0	0	0	0	0	0	0
47.6833	0	0	0	0	0	0	0	0	0	0	0	0	0	0	0	0	0	0	0	0	0	0	0	0	0	0	0	0	0	0	0	0	375.526	0	0	0	0	0	0	0	0	0	0	0	0	0	0	0	0
48.6	0	0	0	0	0	0	0	0	0	0	0	0	0	0	0	0	0	0	0	0	0	0	0	0	0	0	0	0	0	0	0	0	0	0	0	0	0	0	0	0	0	0	0	0	0	0	0	0	0
49.5167	0	0	0	0	0	0	0	0	0	0	0	0	0	0	0	0	0	0	0	0	0	0	0	0	0	0	0	0	0	0	0	0	0	0	0	0	0	0	0	0	0	0	0	0	0	0	0	0	0
50.4333	0	0	0	0	0	0	0	0	0	0	0	0	0	0	0	0	0	0	0	0	0	0	0	0	563.752	0	0	0	0	0	0	0	0	0	0	0	0	0	0	0	0	0	0	0	0	0	0	0	0
51.35	0	0	0	0	0	0	0	0	0	0	0	0	0	0	0	0	0	0	0	0	0	0	0	0	0	0	0	0	0	0	0	0	0	0	0	0	0	0	0	0	0	0	0	0	0	0	0	0	0
52.2667	0	0	0	0	0	0	0	0	0	0	0	0	0	0	0	0	0	0	0	745.333	0	0	0	0	0	0	0	0	0	0	0	0	0	0	0	0	0	0	0	0	0	0	0	0	0	0	0	0	0
53.1833	3049.28	0	0	0	0	0	0	0	0	0	0	0	0	0	0	0	0	0	0	0	0	0	0	0	0	0	0	0	0	0	0	0	0	0	0	0	0	0	0	0	0	0	0	0	0	0	0	0	0
54.1	0	0	0	0	0	0	0	0	0	0	0	0	0	0	0	0	0	0	0	0	0	0	0	0	0	0	0	0	0	0	0	0	0	0	0	0	0	0	0	0	0	0	0	0	0	0	0	0	0
55.0167	0	0	0	0	0	0	0	0	0	0	0	0	0	0	0	0	0	0	0	0	0	0	0	0	0	0	0	0	0	0	0	0	0	0	0	0	0	0	0	0	0	0	0	0	0	0	0	0	0
55.9333	0	0	0	0	0	0	0	0	0	0	0	0	0	0	0	0	0	0	0	0	0	0	0	0	0	0	0	0	0	0	0	0	0	0	0	0	0	0	0	0	0	0	0	0	0	0	0	0	0
56.85	0	0	0	0	0	0	0	0	0	0	0	0	0	0	0	0	0	0	0	0	0	0	0	0	0	0	0	0	0	0	0	0	0	0	0	0	0	0	0	0	0	0	0	0	0	0	0	0	0
57.7667	0	0	0	0	0	0	0	0	0	0	0	0	0	0	0	0	0	0	0	0	0	0	0	0	0	0	0	0	0	0	0	0	0	0	0	0	311.749	0	0	0	0	0	0	0	0	0	0	0	0
58.6833	0	0	0	0	0	0	0	0	0	0	0	0	0	0	0	0	0	0	0	0	0	0	0	0	0	0	0	0	0	0	0	0	0	0	0	0	0	0	0	0	0	0	0	0	0	0	0	0	0
59.6	0	0	0	0	0	0	0	0	0	0	0	0	0	0	0	0	0	0	0	0	0	0	0	0	0	0	0	0	0	0	0	0	0	0	0	0	0	0	0	0	0	0	0	0	0	0	0	0	0
60.5167	0	0	0	0	0	0	0	0	0	0	0	0	0	0	0	0	0	0	0	0	0	0	0	0	0	0	0	0	0	0	0	0	0	0	0	0	0	0	0	0	0	0	0	0	0	0	0	0	0
61.4333	0	0	0	0	0	0	0	0	0	0	0	0	0	0	0	0	0	0	0	0	0	0	0	0	0	0	0	0	0	0	0	0	0	0	0	0	0	0	0	0	0	0	0	0	0	0	0	0	0
62.35	0	0	0	0	0	0	0	0	0	0	0	0	0	0	0	0	0	0	0	0	0	0	0	0	0	0	0	0	0	0	0	0	0	0	0	0	0	0	0	0	0	0	0	0	0	0	0	0	0
63.2667	0	0	0	0	0	0	0	0	0	0	0	0	0	0	0	0	0	0	0	0	0	0	0	0	0	0	0	0	0	0	0	0	0	0	0	0	0	0	0	0	0	0	0	0	0	0	0	0	0
64.1833	0	0	0	0	0	0	0	0	0	0	0	0	0	0	0	0	0	0	0	0	0	0	0	0	0	0	0	0	0	0	0	0	0	0	0	0	0	0	0	0	0	0	0	0	0	0	0	0	0
65.1	0	0	0	0	0	0	0	0	0	0	0	0	0	0	0	0	0	0	0	0	0	0	0	0	0	0	0	0	0	0	0	0	0	0	0	0	0	0	0	0	0	0	0	0	0	0	0	0	0
66.0167	0	0	0	0	0	0	0	0	0	0	0	0	0	0	0	0	0	0	0	0	0	0	0	0	0	0	0	0	0	0	0	0	0	0	0	0	0	0	0	0	0	0	0	0	0	0	0	0	0
66.9333	0	0	0	0	0	0	0	0	0	0	0	0	0	0	0	0	0	0	0	0	0	0	0	0	0	0	0	0	0	0	0	0	0	0	0	0	0	0	0	0	0	0	0	0	0	0	0	0	0
67.85	0	0	0	0	0	0	0	0	0	0	0	0	0	0	0	0	0	0	0	0	0	0	0	0	0	0	0	0	0	0	0	0	0	0	0	0	0	0	0	0	0	0	0	0	0	0	0	0	0
68.7667	0	0	0	0	0	0	0	0	0	0	0	0	0	0	0	0	0	0	0	0	0	0	0	0	0	0	0	0	0	0	0	0	0	0	0	0	0	0	0	0	0	0	0	0	0	0	0	0	0
69.6833	0	0	0	0	0	0	0	0	0	0	0	0	0	0	0	0	0	0	0	0	0	0	0	0	0	0	0	0	0	0	0	0	0	0	0	0	0	0	0	0	0	0	0	0	0	0	0	0	0
70.6	0	0	0	0	0	0	0	0	0	0	0	0	0	0	0	0	0	0	0	0	0	0	0	0	0	0	0	0	0	0	0	0	0	0	0	0	0	0	0	0	0	0	0	0	0	0	0	0	0
71.5167	0	0	0	0	0	0	0	0	0	0	0	0	0	0	0	0	0	0	0	0	0	0	0	0	0	0	0	0	0	0	0	0	0	0	0	0	0	0	0	0	0	0	0	0	0	0	0	0	0
72.4333	0	0	0	0	0	0	0	0	0	0	0	0	0	0	0	0	0	0	0	0	0	0	628.48	0	0	0	0	0	0	0	0	0	0	0	0	0	0	0	0	0	0	0	0	0	0	0	0	0	0
73.35	0	0	0	0	0	0	0	0	0	0	0	0	0	0	0	0	0	0	0	0	0	0	0	0	0	0	0	0	0	0	0	0	0	0	0	0	0	0	0	0	0	0	0	0	0	0	0	0	0
74.2667	0	0	0	0	0	0	0	0	0	0	0	0	0	0	0	0	0	0	0	0	0	0	0	0	0	0	0	0	0	0	0	0	0	0	0	0	0	0	155.716	124.248	0	0	0	0	0	0	0	0	0
75.1833	0	0	0	0	0	0	0	0	0	0	0	0	0	0	0	0	0	0	0	0	0	0	0	0	0	0	0	0	0	0	0	0	0	0	0	0	0	0	0	0	0	0	0	0	0	0	0	0	0
76.1	0	0	0	0	0	0	0	0	0	0	0	0	0	0	0	0	0	0	0	0	0	0	0	0	0	0	0	0	0	0	0	0	0	0	0	0	0	0	0	0	0	0	0	0	0	0	0	0	0
77.0167	0	0	0	0	0	0	0	0	0	0	0	0	0	0	0	0	0	0	0	0	0	0	0	0	0	0	0	0	0	0	0	0	0	0	0	0	0	0	0	0	0	0	0	463.239	0	0	0	0	0
77.9333	0	0	0	0	0	0	0	0	0	0	0	0	0	0	0	0	0	0	0	0	0	0	0	0	0	0	0	0	0	0	0	393.544	0	0	0	0	0	0	0	0	0	0	0	0	0	0	0	0	0
78.85	0	0	0	0	0	0	0	0	0	0	0	0	0	0	0	0	0	0	0	0	0	0	0	0	0	0	0	0	0	0	0	0	0	0	0	0	0	0	0	0	0	0	0	0	0	0	0	0	0
79.7667	0	0	0	0	0	0	0	0	0	0	0	0	0	0	0	0	0	0	0	0	0	0	575.845	49.7286	0	0	0	0	0	0	0	0	0	0	0	0	0	0	0	0	0	0	0	0	0	0	0	0	0
80.6833	0	0	0	0	0	0	0	0	0	0	0	0	0	0	0	0	0	0	0	0	0	0	0	0	0	0	0	0	0	0	0	0	0	0	0	0	0	0	0	0	0	0	0	0	0	0	0	0	0
81.6	0	0	0	0	0	0	0	0	0	0	0	0	0	0	0	0	0	0	0	0	0	0	0	0	0	0	0	0	0	0	0	0	0	0	0	0	0	0	0	0	0	0	0	0	0	0	0	0	0
82.5167	0	0	0	0	0	0	0	0	0	0	0	0	0	0	0	0	0	0	0	0	0	0	0	0	0	0	0	0	0	0	0	0	0	0	0	0	0	0	0	0	0	0	0	0	0	0	0	0	0
83.4333	0	0	0	0	0	0	0	0	0	0	0	0	0	0	0	0	0	0	0	0	0	0	628.473	0	0	0	0	0	0	0	0	0	0	0	0	0	0	0	0	0	0	0	0	0	0	0	0	0	0
84.35	0	0	0	0	0	0	0	0	0	0	0	0	0	0	0	0	0	0	0	0	0	0	0	0	0	1067.48	0	0	0	0	0	0	0	0	0	0	0	0	0	0	0	0	0	0	0	214.076	0	0	0
85.2667	0	0	0	0	0	0	0	0	0	0	0	0	0	0	0	0	0	0	0	0	0	0	0	0	0	0	0	0	0	0	0	0	0	0	0	0	0	0	0	0	524.448	0	0	0	0	0	0	0	0
86.1833	0	0	0	0	0	0	0	0	0	0	0	0	0	0	0	0	0	0	0	1490.65	0	0	0	0	0	0	0	0	0	0	0	0	0	0	0	0	0	0	0	0	0	0	0	0	0	0	0	0	0
87.1	0	0	0	0	0	1917.48	0	3266.68	0	0	0	0	0	0	0	1897.76	890.358	837.249	0	0	0	0	0	593.768	0	0	0	0	0	0	0	0	0	0	0	0	0	0	0	0	0	0	0	0	0	0	0	0	0
88.0167	3049.25	8315.24	2510.42	9152.64	8385.54	3834.93	3540.28	3266.65	4534.62	5630.67	6541.88	9789.29	0	0	1006.79	1897.74	0	2511.72	789.933	745.319	0	0	628.468	1187.52	0	0	0	0	0	0	0	0	0	0	0	0	0	0	0	0	0	0	0	0	0	0	0	0	0
88.9333	3049.25	5543.49	10041.7	6864.48	14574	9679.46	8850.7	9799.95	9069.23	12669	11775.4	3109.69	6266.25	3225.19	4027.14	3795.48	3561.4	2511.72	4739.6	1490.64	2818.42	1327.49	1885.4	593.763	0	0	0	0	0	0	0	0	0	0	0	0	0	0	0	0	0	0	0	0	0	0	0	0	0
89.85	3049.25	2771.75	2510.42	4576.32	4192.77	5752.39	10124.5	13524.6	13603.8	15484.3	7850.26	18354.9	12627.3	16369.4	22928.1	30032.8	14735.4	17859.8	24856.9	22438.5	12608.2	19248.7	11940.9	4750.1	7328.71	1958.92	1179.42	2400.58	0	0	0	0	0	357.85	0	0	0	0	0	0	0	0	0	0	0	0	0	0	0
90.7667	0	5543.49	2510.42	4576.32	4192.77	15339.7	14161.1	19911.8	26111.6	13421	14392.1	16570	12005.9	14462.6	17666.2	16130.8	15135.9	10046.9	14218.8	8277.45	10494.4	9070.74	4609.2	6049.48	6340	4929.38	3710.59	1492.32	2238.99	868.935	413.327	393.537	751.043	357.85	682.443	0	0	0	0	0	0	0	0	0	0	0	0	0	0
91.6833	9147.75	0	7531.25	4576.32	12578.3	19174.6	5310.42	14699.9	13603.8	16653.2	12491.8	14883.9	11876.5	14340.5	15880.6	18867	18980.1	15329.7	9717.5	16536.7	15071.8	12794	10265.4	13062.8	8701.19	8307.8	5568.59	6293.49	1781.29	2606.8	1519.19	914.774	751.043	0	0	0	311.743	0	0	0	0	0	0	0	0	0	0	0	0
92.6	3049.22	5543.44	5020.79	11440.7	8294.96	7752.55	19471.3	21233	15827.8	28666.5	22711.6	30352.7	21688.4	45517.1	41174.9	34776.1	47568.4	46741.1	55123.9	55218.1	61645.9	45981	50444.3	43729.8	37688	30757.9	24720.4	20211.1	8696.37	11296	8266.47	3935.33	3754.15	1074.52	1023.66	2282.48	0	894.55	0	0	0	0	0	0	0	0	0	0	0
93.5167	19369.9	12882.5	12552.3	16017.3	20964.2	17257.4	15421.1	15171.1	15806.9	20471.6	18552.9	24904.4	18904.5	19351.4	22247.5	19594	22824.1	26891.6	25516.4	33012.9	30765.8	30464	28976.7	32904.3	37584.5	36896.9	31341	26120.6	27925.4	17237.7	16952.8	10887	13640.7	11538.9	11264.1	7098.71	3117.47	2385.53	570.882	0	262.225	0	241.239	0	0	0	0	0	0
94.4333	18295.3	2771.72	18420.8	12955.8	10481.8	10904.2	30646.4	34464.3	16474.2	26745.4	35580.9	28575.3	31513.5	23901.6	26510.8	33622.5	37950.6	41338.6	30522.7	39024.6	39594.4	37704.2	33861.5	34625.8	31080.1	26530.2	37655.7	30269.7	25563.3	17460.8	15779.3	18106.9	9501.31	9662.82	7506.81	9898.72	7197.72	5388.83	1728.25	1483.44	262.219	251.176	241.233	0	0	0	0	0	0
95.35	3049.22	18115.6	11206.7	13728.8	4192.73	15339.6	15931.1	16333.1	15115.2	22291.9	17223.1	24589.2	35476.7	32502	33995.9	26464.2	38752.9	36489.5	32244.8	42870.5	39635.2	31697	45659.3	38594.2	36014.9	39404.5	29816.6	30968.9	26327.1	22536	18259.2	24796.9	14382	14315.8	11942.6	5543.16	2493.92	1789.1	1590.92	663.301	1048.88	251.176	0	0	0	0	0	0	0
96.2667	7203.85	4538.63	15062.4	8157.82	15495.4	13504.9	15444.1	16782.5	18138.3	18299.5	22497.3	30352.7	26402.3	27126.8	38023	29414.7	40621.6	39260.7	37080.5	38582.5	38593.1	42046.3	37451.6	43369.3	56818.8	43182.7	44155.9	41392.1	37603.5	32479.3	26178.9	20592.3	20012.7	13649.5	11728.8	9291.05	7309.27	3146.82	2568.91	1260.42	1151.01	502.351	482.467	0	0	0	0	0	0
97.1833	12196.9	8315.16	5020.79	16017	31445.5	11504.7	17214.2	25113.9	20209.9	23266.5	23550.6	29367.6	33045.5	36206.5	38795.2	43439.9	41521.4	46627.6	53486.7	52390.5	36839.7	46428.2	42517	43217	49101.7	45790.2	45936.1	50490.4	40281.6	49498.9	31479.2	28398.6	21085.2	17988.1	12620.9	12750.9	8895.67	6304.9	4434.49	2743.86	2199.89	1004.7	869.753	786.222	0	0	0	0	0
98.1	9147.88	5543.57	5416.69	8792.03	20964.2	13422.4	11880.7	21704.5	18138.7	16892.2	24021.9	30230	38957	36176.2	28738.7	34924.2	41847	48142.2	39421.9	60956.4	55093.6	52594.8	54817.8	53848.2	54774.5	67040.7	67452	52788.6	48842.7	48754	51629.5	32404.1	36153.3	26346.9	24275.3	18036.7	18296.3	10826.3	11132.2	5741.12	3146.7	3919.28	1060.64	1389.71	222.747	0	206.277	0	0
99.0167	4154.63	10082.1	10041.6	13728.8	18776.8	9669.99	17701.2	27766.2	18138.3	26514.8	31615.1	29367.6	33167.7	26416.6	33323.8	39315.7	40436.2	43651.6	48900.7	45374.8	58378.8	60083	60435.2	55163.4	63512.2	60989.9	58573.9	62861.2	53370.5	52385.2	53537.7	53381.9	40666.2	38077.8	33990.2	30880	21565.5	12721.5	13298.6	7781.24	3938.02	3107.4	1688.63	1158.06	890.967	0	0	0	0
99.9333	21344.7	19402.2	5020.84	9152.64	8385.54	7669.85	18975.2	15313.9	28574.9	29561	27723.1	35917.4	37001.6	36206.4	40940.4	36673.9	50962.5	45633.7	40524.9	44113.5	51677.7	62603.9	45419.6	53220.8	67747.2	57260.6	65533.8	76801.5	62729.2	73006.6	58658.6	65260.9	58088.5	62566.4	38546.3	39992.2	26662.2	20167.8	16124.5	8639.19	10593.5	3767.67	1688.65	1389.69	890.976	214.074	206.274	0	0
100.85	10253.1	10082.1	7531.18	9152.55	16770.9	9587.22	17214.2	15149.2	19649.8	20884.2	24019.9	20563.5	27428.1	32042.2	49766.8	55754.9	43909.6	57191.3	59198.5	53081.5	46585	63449.4	51804.1	54142	73406.9	64505.1	59862.9	67567.7	59915.3	48906.7	49143.5	51662.6	51182.8	38218.1	36588.2	36862.1	29731.6	25234.9	19921.3	12611.4	10226.5	5274.68	3859.73	3937.41	1447.4	837.586	740.364	0	0
[truncated: 16 more columns]

## Sheet: d
Time (min)	HNO3 conc. (cm^-3)		Time (min)	H2SO4 conc. (cm^-3)		Time (min)	NH3 conc. (cm^-3)
-10	5055180000		-10	101150		79.5333	0
-8	5042140000		-8	101150		80.55	0
-6	5042140000		-6	129650		81.55	94252000
-4	5027350000		-4	142150		82.5667	174530000
-2	4860820000		-2	163650		83.5667	242920000
0	4676270000		0	233650		84.4333	301190000
2	4547430000		2	362150		85.4333	350780000
4	4402320000		4	820150		86.45	393030000
6	4314570000		6	1736150		87.45	429030000
8	4235150000		8	2773650		88.4667	459730000
10	4185050000		10	3608650		89.4667	485930000
12	4164310000		12	4003650		90.4833	508260000
14	4124280000		14	4223650		91.4833	527320000
16	4066950000		16	4538650		92.5	543540000
18	4034930000		18	4748650		93.5	557360000
20	3950960000		20	4808650		94.5167	569130000
22	3842230000		22	4823650		95.5167	579150000
24	3770660000		24	4823650		96.5333	587680000
26	3763230000		26	4823650		97.5333	594940000
28	3703700000		28	4903650		98.55	601130000
30	3609870000		30	5003650		99.55	606400000
32	3522100000		32	5003650		100.567	610900000
34	3522100000		34	5003650
36	3522100000		36	5003650
38	3522100000		38	4938650
40	3522100000		40	5008650
42	3556070000		42	4938650
44	3522100000		44	5008650
46	3522100000		46	5063650
48	3536230000		48	5103650
50	3661590000		50	5098650
52	3774920000		52	5113650
54	3774920000		54	5133650
56	3661590000		56	5133650
58	3661590000		58	5133650
60	3661590000		60	5113650
62	3661590000		62	5113650
64	3661590000		64	5113650
66	3548990000		66	5113650
68	3548990000		68	5093650
70	3548990000		70	5023650
72	3548990000		72	5023650
74	3511710000		74	5023650
76	3492570000		76	5023650
78	3463430000		78	5023650
80	3377370000		80	4958650
82	3303730000		82	4958650
84	3259240000		84	4693650
86	2929680000		86	4253650
88	2628450000		88	3963650
90	2351330000		90	3183650
92	1688570000		92	2508650
94	1077180000		94	2413650
96	766750000		96	2318650
98	633639000		98	2268650
100	602103000		100	2218650
