# Supplementary material for: Synergistic HNO3–H2SO4–NH3 upper tropospheric particle formation
Source: Nature. 2022 May 18;605(7910):483–9. doi: 10.1038/s41586-022-04605-4 (PMC9117139; doi:10.1038/s41586-022-04605-4)
Supplement: Supplementary file 8 — Source Data Extended Data Fig. 3 [file 41586_2022_4605_MOESM8_ESM.xlsx]

## Sheet: JvsNH3
NH3 conc. (cm^-3)	J_1.7_HNO3-H2SO4-NH3_meas (cm^-3 s^-1)		NH3 conc. (cm^-3)	J_1.7_HNO3-H2SO4-NH3_model (cm^-3 s^-1)
175357000	11.3627		65997400	5.43089
244447000	41.1575		66194800	5.46507
303338000	61.6605		66392200	5.49942
355320000	64.407		66589600	5.53394
398090000	98.1613		66787000	5.56862
434280000	184.375		66984400	5.60347
467180000	244.813		67181800	5.6385
493500000	252.058		67379200	5.67369
516530000	294.454		67576600	5.70906
536270000	382.245		67774000	5.74461
			67971400	5.78033
			68168800	5.81623
			68366200	5.85231
			68563600	5.88858
			68761000	5.92502
			68958400	5.96165
			69155800	5.99847
			69353200	6.03548
			69550600	6.07267
			69748000	6.11006
			69945400	6.14764
			70142800	6.18541
			70340200	6.22338
			70537600	6.26154
			70735000	6.29991
			70932400	6.33847
			71129800	6.37724
			71327200	6.41621
			71524600	6.45538
			71722000	6.49476
			71919400	6.53435
			72116800	6.57415
			72314200	6.61416
			72511600	6.65438
			72709000	6.69482
			72906400	6.73547
			73103800	6.77634
			73301200	6.81742
			73498600	6.85873
			73696000	6.90026
			73893400	6.94201
			74090800	6.98399
			74288200	7.02619
			74485600	7.06862
			74683000	7.11128
			74880400	7.15417
			75077800	7.19729
			75275200	7.24064
			75472600	7.28423
			75670000	7.32806
			75867400	7.37212
			76064800	7.41642
			76262200	7.46096
			76459600	7.50574
			76657000	7.55076
			76854400	7.59603
			77051800	7.64154
			77249200	7.68729
			77446600	7.7333
			77644000	7.77955
			77841400	7.82605
			78038800	7.87279
			78236200	7.91979
			78433600	7.96704
			78631000	8.01455
			78828400	8.0623
			79025800	8.11031
			79223200	8.15857
			79420600	8.20709
			79618000	8.25586
			79815400	8.30489
			80012800	8.35418
			80210200	8.40372
			80407600	8.45351
			80605000	8.50356
			80802400	8.55387
			80999800	8.60443
			81197200	8.65525
			81394600	8.70632
			81592000	8.75765
			81789400	8.80923
			81986800	8.86107
			82184200	8.91316
			82381600	8.9655
			82579000	9.01809
			82776400	9.07093
			82973800	9.12403
			83171200	9.17736
			83368600	9.23095
			83566000	9.28478
			83763400	9.33885
			83960800	9.39316
			84158200	9.44771
			84355600	9.5025
			84553000	9.55753
			84750400	9.61278
			84947800	9.66827
			85145200	9.72398
			85342600	9.77992
			85540000	9.83608
			85737400	9.89246
			85934800	9.94906
			86132200	10.0059
			86329600	10.0629
			86527000	10.1201
			86724400	10.1776
			86921800	10.2352
			87119200	10.293
			87316600	10.351
			87514000	10.4092
			87711400	10.4676
			87908800	10.5262
			88106200	10.5849
			88303600	10.6438
			88501000	10.7029
			88698400	10.7622
			88895800	10.8216
			89093200	10.8811
			89290600	10.9408
			89488000	11.0007
			89685400	11.0607
			89882800	11.1208
			90080200	11.181
			90277600	11.2414
			90475000	11.3019
			90672400	11.3625
			90869800	11.4232
			91067200	11.484
			91264600	11.545
			91462000	11.606
			91659400	11.6671
			91856800	11.7282
			92054200	11.7895
			92251600	11.8508
			92449000	11.9122
			92646400	11.9736
			92843800	12.0351
			93041200	12.0967
			93238600	12.1583
			93436000	12.2199
			93633400	12.2816
			93830800	12.3433
			94028200	12.405
			94225600	12.4668
			94423000	12.5285
			94620400	12.5903
			94817800	12.652
			95015200	12.7138
			95212600	12.7756
			95410000	12.8373
			95607400	12.8991
			95804800	12.9608
			96002200	13.0225
			96199600	13.0841
			96397000	13.1457
			96594400	13.2073
			96791800	13.2689
			96989200	13.3304
			97186600	13.3918
			97384000	13.4533
			97581400	13.5146
			97778800	13.5759
			97976200	13.6371
			98173600	13.6983
			98371000	13.7593
			98568400	13.8204
			98765800	13.8813
			98963200	13.9422
			99160600	14.0029
			99358000	14.0636
			99555400	14.1242
			99752800	14.1848
			99950200	14.2452
			100148000	14.3055
			100345000	14.3658
			100542000	14.4259
			100740000	14.486
			100937000	14.5459
			101135000	14.6058
			101332000	14.6656
			101529000	14.7252
			101727000	14.7848
			101924000	14.8442
			102122000	14.9035
			102319000	14.9628
			102516000	15.0219
			102714000	15.081
			102911000	15.1399
			103109000	15.1987
			103306000	15.2574
			103503000	15.316
			103701000	15.3746
			103898000	15.433
			104096000	15.4913
			104293000	15.5495
			104490000	15.6076
			104688000	15.6656
			104885000	15.7235
			105083000	15.7814
			105280000	15.8391
			105477000	15.8967
			105675000	15.9543
			105872000	16.0117
			106070000	16.0691
			106267000	16.1264
			106464000	16.1836
			106662000	16.2407
			106859000	16.2978
			107057000	16.3547
			107254000	16.4116
			107451000	16.4685
			107649000	16.5252
			107846000	16.5819
			108044000	16.6386
			108241000	16.6952
			108438000	16.7517
			108636000	16.8082
			108833000	16.8646
			109031000	16.921
			109228000	16.9773
			109425000	17.0336
			109623000	17.0899
			109820000	17.1461
			110018000	17.2023
			110215000	17.2585
			110412000	17.3146
			110610000	17.3708
			110807000	17.4269
			111005000	17.483
			111202000	17.5391
			111399000	17.5952
			111597000	17.6513
			111794000	17.7074
			111992000	17.7636
			112189000	17.8197
			112386000	17.8758
			112584000	17.932
			112781000	17.9882
			112979000	18.0444
			113176000	18.1007
			113373000	18.157
			113571000	18.2133
			113768000	18.2697
			113966000	18.3261
			114163000	18.3826
			114360000	18.4391
			114558000	18.4957
			114755000	18.5524
			114953000	18.6091
			115150000	18.6659
			115347000	18.7228
			115545000	18.7798
			115742000	18.8368
			115940000	18.894
			116137000	18.9512
			116334000	19.0085
			116532000	19.0659
			116729000	19.1235
			116927000	19.1811
			117124000	19.2388
			117321000	19.2967
			117519000	19.3547
			117716000	19.4128
			117914000	19.471
			118111000	19.5294
			118308000	19.5879
			118506000	19.6465
			118703000	19.7053
			118901000	19.7642
			119098000	19.8233
			119295000	19.8825
			119493000	19.9419
			119690000	20.0014
			119888000	20.0611
			120085000	20.1209
			120282000	20.181
			120480000	20.2412
			120677000	20.3015
			120875000	20.3621
			121072000	20.4228
			121269000	20.4837
			121467000	20.5448
			121664000	20.6061
			121862000	20.6676
			122059000	20.7293
			122256000	20.7912
			122454000	20.8532
			122651000	20.9155
			122849000	20.978
			123046000	21.0407
			123243000	21.1036
			123441000	21.1668
			123638000	21.2301
			123836000	21.2937
			124033000	21.3575
			124230000	21.4215
			124428000	21.4858
			124625000	21.5502
			124823000	21.615
			125020000	21.6799
			125217000	21.7451
			125415000	21.8105
			125612000	21.8762
			125810000	21.9421
			126007000	22.0083
			126204000	22.0747
			126402000	22.1413
			126599000	22.2083
			126797000	22.2754
			126994000	22.3428
			127191000	22.4105
			127389000	22.4785
			127586000	22.5467
			127784000	22.6152
			127981000	22.6839
			128178000	22.7529
			128376000	22.8222
			128573000	22.8917
			128771000	22.9615
			128968000	23.0316
			129165000	23.102
			129363000	23.1727
			129560000	23.2436
			129758000	23.3148
			129955000	23.3863
			130152000	23.4581
			130350000	23.5301
			130547000	23.6025
			130745000	23.6751
			130942000	23.7481
			131139000	23.8213
			131337000	23.8948
			131534000	23.9686
			131732000	24.0427
			131929000	24.1171
			132126000	24.1918
			132324000	24.2667
			132521000	24.342
			132719000	24.4176
			132916000	24.4935
			133113000	24.5697
			133311000	24.6462
			133508000	24.723
			133706000	24.8001
			133903000	24.8775
			134100000	24.9552
			134298000	25.0332
			134495000	25.1116
			134693000	25.1902
			134890000	25.2692
			135087000	25.3484
			135285000	25.428
			135482000	25.5079
			135680000	25.5881
			135877000	25.6686
			136074000	25.7494
			136272000	25.8306
			136469000	25.9121
			136667000	25.9939
			136864000	26.076
			137061000	26.1584
			137259000	26.2411
			137456000	26.3242
			137654000	26.4076
			137851000	26.4913
			138048000	26.5753
			138246000	26.6596
			138443000	26.7443
			138641000	26.8293
			138838000	26.9146
			139035000	27.0003
			139233000	27.0863
			139430000	27.1726
			139628000	27.2592
			139825000	27.3461
			140022000	27.4334
			140220000	27.521
			140417000	27.6089
			140615000	27.6972
			140812000	27.7858
			141009000	27.8747
			141207000	27.964
			141404000	28.0535
			141602000	28.1435
			141799000	28.2337
			141996000	28.3243
			142194000	28.4152
			142391000	28.5064
			142589000	28.598
			142786000	28.6899
			142983000	28.7821
			143181000	28.8747
			143378000	28.9676
			143576000	29.0608
			143773000	29.1544
			143970000	29.2483
			144168000	29.3426
			144365000	29.4371
			144563000	29.5321
			144760000	29.6273
			144957000	29.7229
			145155000	29.8188
			145352000	29.9151
			145550000	30.0117
			145747000	30.1086
			145944000	30.2059
			146142000	30.3035
			146339000	30.4014
			146537000	30.4997
			146734000	30.5983
			146931000	30.6973
			147129000	30.7966
			147326000	30.8962
			147524000	30.9962
			147721000	31.0965
			147918000	31.1972
			148116000	31.2982
			148313000	31.3995
			148511000	31.5012
			148708000	31.6032
			148905000	31.7056
			149103000	31.8083
			149300000	31.9113
			149498000	32.0147
			149695000	32.1184
			149892000	32.2225
			150090000	32.3269
			150287000	32.4316
			150485000	32.5367
			150682000	32.6422
			150879000	32.7479
			151077000	32.8541
			151274000	32.9605
			151472000	33.0673
			151669000	33.1745
			151866000	33.282
			152064000	33.3898
			152261000	33.498
			152459000	33.6065
			152656000	33.7154
			152853000	33.8246
			153051000	33.9341
			153248000	34.044
			153446000	34.1543
			153643000	34.2649
			153840000	34.3758
			154038000	34.4871
			154235000	34.5987
			154433000	34.7106
			154630000	34.823
			154827000	34.9356
			155025000	35.0486
			155222000	35.162
			155420000	35.2757
			155617000	35.3897
			155814000	35.5041
			156012000	35.6188
			156209000	35.7339
			156407000	35.8493
			156604000	35.9651
			156801000	36.0812
			156999000	36.1977
			157196000	36.3145
			157394000	36.4316
			157591000	36.5491
			157788000	36.667
			157986000	36.7852
			158183000	36.9037
			158381000	37.0226
			158578000	37.1419
			158775000	37.2614
			158973000	37.3814
			159170000	37.5017
			159368000	37.6223
			159565000	37.7433
			159762000	37.8646
			159960000	37.9863
			160157000	38.1083
			160355000	38.2307
			160552000	38.3534
			160749000	38.4765
			160947000	38.5999
			161144000	38.7237
			161342000	38.8478
			161539000	38.9723
			161736000	39.0971
			161934000	39.2223
			162131000	39.3478
			162329000	39.4736
			162526000	39.5999
			162723000	39.7264
			162921000	39.8534
			163118000	39.9806
			163316000	40.1082
			163513000	40.2362
			163710000	40.3645
			163908000	40.4932
			164105000	40.6222
			164303000	40.7516
			164500000	40.8813
			164697000	41.0114
			164895000	41.1418
			165092000	41.2726
			165290000	41.4037
			165487000	41.5352
			165684000	41.667
			165882000	41.7992
			166079000	41.9317
			166277000	42.0646
			166474000	42.1978
			166671000	42.3314
			166869000	42.4654
			167066000	42.5997
			167264000	42.7343
			167461000	42.8693
			167658000	43.0046
			167856000	43.1403
			168053000	43.2764
			168251000	43.4128
			168448000	43.5495
			168645000	43.6867
			168843000	43.8241
			169040000	43.9619
			169238000	44.1001
			169435000	44.2386
			169632000	44.3775
			169830000	44.5167
			170027000	44.6563
			170225000	44.7962
			170422000	44.9365
			170619000	45.0772
			170817000	45.2182
			171014000	45.3595
			171212000	45.5012
			171409000	45.6433
			171606000	45.7857
			171804000	45.9285
			172001000	46.0716
			172199000	46.215
			172396000	46.3589
			172593000	46.503
			172791000	46.6476
			172988000	46.7925
			173186000	46.9377
			173383000	47.0833
			173580000	47.2293
			173778000	47.3756
			173975000	47.5222
			174173000	47.6693
			174370000	47.8166
			174567000	47.9644
			174765000	48.1124
			174962000	48.2609
			175160000	48.4097
			175357000	48.5588
			175554000	48.7083
			175752000	48.8582
			175949000	49.0084
			176147000	49.1589
			176344000	49.3099
			176541000	49.4612
			176739000	49.6128
			176936000	49.7648
			177134000	49.9171
			177331000	50.0698
			177528000	50.2229
			177726000	50.3763
			177923000	50.5301
			178121000	50.6842
			178318000	50.8387
			178515000	50.9935
			178713000	51.1487
			178910000	51.3042
			179108000	51.4601
			179305000	51.6164
			179502000	51.773
			179700000	51.93
			179897000	52.0873
			180095000	52.245
			180292000	52.4031
			180489000	52.5615
			180687000	52.7202
			180884000	52.8793
			181082000	53.0388
			181279000	53.1986
			181476000	53.3588
			181674000	53.5193
			181871000	53.6802
			182069000	53.8415
			182266000	54.0031
			182463000	54.1651
			182661000	54.3274
			182858000	54.4901
			183056000	54.6531
			183253000	54.8165
			183450000	54.9802
			183648000	55.1443
			183845000	55.3088
			184043000	55.4736
			184240000	55.6388
			184437000	55.8043
			184635000	55.9702
			184832000	56.1365
			185030000	56.3031
			185227000	56.47
			185424000	56.6373
			185622000	56.805
			185819000	56.973
			186017000	57.1414
			186214000	57.3102
			186411000	57.4793
			186609000	57.6487
			186806000	57.8186
			187004000	57.9887
			187201000	58.1593
			187398000	58.3302
			187596000	58.5014
			187793000	58.673
			187991000	58.845
			188188000	59.0173
			188385000	59.19
			188583000	59.363
			188780000	59.5364
			188978000	59.7101
			189175000	59.8842
			189372000	60.0587
			189570000	60.2335
			189767000	60.4087
			189965000	60.5842
			190162000	60.7601
			190359000	60.9363
			190557000	61.113
			190754000	61.2899
			190952000	61.4672
			191149000	61.6449
			191346000	61.8229
			191544000	62.0013
			191741000	62.1801
			191939000	62.3592
			192136000	62.5386
			192333000	62.7184
			192531000	62.8986
			192728000	63.0791
			192926000	63.26
			193123000	63.4413
			193320000	63.6229
			193518000	63.8048
			193715000	63.9871
			193913000	64.1698
			194110000	64.3528
			194307000	64.5362
			194505000	64.72
			194702000	64.9041
			194900000	65.0885
			195097000	65.2733
			195294000	65.4585
			195492000	65.644
			195689000	65.8299
			195887000	66.0161
			196084000	66.2027
			196281000	66.3897
			196479000	66.577
			196676000	66.7646
			196874000	66.9526
			197071000	67.141
			197268000	67.3297
			197466000	67.5188
			197663000	67.7083
			197861000	67.8981
			198058000	68.0882
			198255000	68.2787
			198453000	68.4696
			198650000	68.6608
			198848000	68.8524
			199045000	69.0443
			199242000	69.2366
			199440000	69.4292
			199637000	69.6222
			199835000	69.8156
			200032000	70.0093
			200229000	70.2034
			200427000	70.3978
			200624000	70.5925
			200822000	70.7877
			201019000	70.9832
			201216000	71.179
			201414000	71.3752
			201611000	71.5717
			201809000	71.7686
			202006000	71.9659
			202203000	72.1635
			202401000	72.3615
			202598000	72.5598
			202796000	72.7585
			202993000	72.9575
			203190000	73.1569
			203388000	73.3566
			203585000	73.5567
			203783000	73.7571
			203980000	73.9579
			204177000	74.1591
			204375000	74.3606
			204572000	74.5625
			204770000	74.7647
			204967000	74.9672
			205164000	75.1702
			205362000	75.3734
			205559000	75.5771
			205757000	75.781
			205954000	75.9854
			206151000	76.1901
			206349000	76.3951
			206546000	76.6005
			206744000	76.8062
			206941000	77.0123
			207138000	77.2188
			207336000	77.4256
			207533000	77.6327
			207731000	77.8402
			207928000	78.0481
			208125000	78.2563
			208323000	78.4649
			208520000	78.6738
			208718000	78.883
			208915000	79.0927
			209112000	79.3026
			209310000	79.5129
			209507000	79.7236
			209705000	79.9346
			209902000	80.146
			210099000	80.3577
			210297000	80.5698
			210494000	80.7822
			210692000	80.995
			210889000	81.2081
			211086000	81.4216
			211284000	81.6354
			211481000	81.8496
			211679000	82.0641
			211876000	82.279
			212073000	82.4942
			212271000	82.7098
			212468000	82.9257
			212666000	83.142
			212863000	83.3586
			213060000	83.5756
			213258000	83.7929
			213455000	84.0105
			213653000	84.2286
			213850000	84.4469
			214047000	84.6656
			214245000	84.8847
			214442000	85.1041
			214640000	85.3239
			214837000	85.544
			215034000	85.7644
			215232000	85.9852
			215429000	86.2064
			215627000	86.4278
			215824000	86.6497
			216021000	86.8719
			216219000	87.0944
			216416000	87.3173
			216614000	87.5405
			216811000	87.7641
			217008000	87.988
			217206000	88.2123
			217403000	88.4369
			217601000	88.6618
			217798000	88.8871
			217995000	89.1128
			218193000	89.3388
			218390000	89.5651
			218588000	89.7918
			218785000	90.0188
			218982000	90.2462
			219180000	90.4739
			219377000	90.702
			219575000	90.9304
			219772000	91.1591
			219969000	91.3882
			220167000	91.6177
			220364000	91.8474
			220562000	92.0776
			220759000	92.308
			220956000	92.5388
			221154000	92.77
			221351000	93.0015
			221549000	93.2333
			221746000	93.4655
			221943000	93.698
			222141000	93.9309
			222338000	94.1641
			222536000	94.3976
			222733000	94.6315
			222930000	94.8657
			223128000	95.1003
			223325000	95.3352
			223523000	95.5705
			223720000	95.806
			223917000	96.042
			224115000	96.2782
			224312000	96.5148
			224510000	96.7518
			224707000	96.9891
			224904000	97.2267
			225102000	97.4647
			225299000	97.703
			225497000	97.9416
			225694000	98.1806
			225891000	98.4199
			226089000	98.6596
			226286000	98.8996
			226484000	99.1399
			226681000	99.3806
			226878000	99.6216
			227076000	99.863
			227273000	100.105
			227471000	100.347
			227668000	100.589
			227865000	100.832
			228063000	101.075
			228260000	101.318
			228458000	101.562
			228655000	101.806
			228852000	102.05
			229050000	102.295
			229247000	102.54
			229445000	102.785
			229642000	103.031
			229839000	103.277
			230037000	103.523
			230234000	103.77
			230432000	104.017
			230629000	104.265
			230826000	104.512
			231024000	104.76
			231221000	105.009
			231419000	105.257
			231616000	105.506
			231813000	105.756
			232011000	106.006
			232208000	106.256
			232406000	106.506
			232603000	106.757
			232800000	107.008
			232998000	107.259
			233195000	107.511
			233393000	107.763
			233590000	108.015
			233787000	108.268
			233985000	108.521
			234182000	108.774
			234380000	109.028
			234577000	109.282
			234774000	109.536
			234972000	109.791
			235169000	110.046
			235367000	110.301
			235564000	110.557
			235761000	110.813
			235959000	111.069
			236156000	111.325
			236354000	111.582
			236551000	111.84
			236748000	112.097
			236946000	112.355
			237143000	112.613
			237341000	112.872
			237538000	113.131
			237735000	113.39
			237933000	113.65
			238130000	113.91
			238328000	114.17
			238525000	114.43
			238722000	114.691
			238920000	114.952
			239117000	115.214
			239315000	115.475
			239512000	115.738
			239709000	116
			239907000	116.263
			240104000	116.526
			240302000	116.789
			240499000	117.053
			240696000	117.317
			240894000	117.581
			241091000	117.846
			241289000	118.111
			241486000	118.377
			241683000	118.642
			241881000	118.908
			242078000	119.174
			242276000	119.441
			242473000	119.708
			242670000	119.975
			242868000	120.243
			243065000	120.511
			243263000	120.779
			243460000	121.047
			243657000	121.316
			243855000	121.585
			244052000	121.855
			244250000	122.125
			244447000	122.395
			244644000	122.665
			244842000	122.936
			245039000	123.207
			245237000	123.478
			245434000	123.75
			245631000	124.022
			245829000	124.294
			246026000	124.567
			246224000	124.84
			246421000	125.113
			246618000	125.386
			246816000	125.66
			247013000	125.934
			247211000	126.209
			247408000	126.484
			247605000	126.759
			247803000	127.034
			248000000	127.31
			248198000	127.586
			248395000	127.862
			248592000	128.139
			248790000	128.416
			248987000	128.693
			249185000	128.97
			249382000	129.248
			249579000	129.527
			249777000	129.805
			249974000	130.084
			250172000	130.363
			250369000	130.642
			250566000	130.922
			250764000	131.202
			250961000	131.482
			251159000	131.763
			251356000	132.044
			251553000	132.325
			251751000	132.607
			251948000	132.888
			252146000	133.171
			252343000	133.453
			252540000	133.736
			252738000	134.019
			252935000	134.302
			253133000	134.586
			253330000	134.87
			253527000	135.154
			253725000	135.439
			253922000	135.723
			254120000	136.009
			254317000	136.294
			254514000	136.58
			254712000	136.866
			254909000	137.152
			255107000	137.439
			255304000	137.726
			255501000	138.013
			255699000	138.3
			255896000	138.588
			256094000	138.876
			256291000	139.165
			256488000	139.454
			256686000	139.743
			256883000	140.032
			257081000	140.321
			257278000	140.611
			257475000	140.901
			257673000	141.192
			257870000	141.483
			258068000	141.774
			258265000	142.065
			258462000	142.357
			258660000	142.649
			258857000	142.941
			259055000	143.233
			259252000	143.526
			259449000	143.819
			259647000	144.113
			259844000	144.406
			260042000	144.7
			260239000	144.995
			260436000	145.289
			260634000	145.584
			260831000	145.879
			261029000	146.175
			261226000	146.47
			261423000	146.766
			261621000	147.062
			261818000	147.359
			262016000	147.656
			262213000	147.953
			262410000	148.25
			262608000	148.548
			262805000	148.846
			263003000	149.144
			263200000	149.443
			263397000	149.742
			263595000	150.041
			263792000	150.34
			263990000	150.64
			264187000	150.94
			264384000	151.24
			264582000	151.54
			264779000	151.841
			264977000	152.142
			265174000	152.444
			265371000	152.745
			265569000	153.047
			265766000	153.349
			265964000	153.652
			266161000	153.954
			266358000	154.257
			266556000	154.561
			266753000	154.864
			266951000	155.168
			267148000	155.472
			267345000	155.776
			267543000	156.081
			267740000	156.386
			267938000	156.691
			268135000	156.997
			268332000	157.302
			268530000	157.608
			268727000	157.915
			268925000	158.221
			269122000	158.528
			269319000	158.835
			269517000	159.142
			269714000	159.45
			269912000	159.758
			270109000	160.066
			270306000	160.375
			270504000	160.683
			270701000	160.992
			270899000	161.301
			271096000	161.611
			271293000	161.921
			271491000	162.231
			271688000	162.541
			271886000	162.852
			272083000	163.162
			272280000	163.473
			272478000	163.785
			272675000	164.096
			272873000	164.408
			273070000	164.72
			273267000	165.033
			273465000	165.345
			273662000	165.658
			273860000	165.972
			274057000	166.285
			274254000	166.599
			274452000	166.913
			274649000	167.227
			274847000	167.541
			275044000	167.856
			275241000	168.171
			275439000	168.486
			275636000	168.802
			275834000	169.117
			276031000	169.433
			276228000	169.75
			276426000	170.066
			276623000	170.383
			276821000	170.7
			277018000	171.017
			277215000	171.335
			277413000	171.653
			277610000	171.971
			277808000	172.289
			278005000	172.607
			278202000	172.926
			278400000	173.245
			278597000	173.564
			278795000	173.884
			278992000	174.204
			279189000	174.524
			279387000	174.844
			279584000	175.164
			279782000	175.485
			279979000	175.806
			280176000	176.127
			280374000	176.449
			280571000	176.771
			280769000	177.093
			280966000	177.415
			281163000	177.737
			281361000	178.06
			281558000	178.383
			281756000	178.706
			281953000	179.03
			282150000	179.353
			282348000	179.677
			282545000	180.001
			282743000	180.326
			282940000	180.65
			283137000	180.975
			283335000	181.3
			283532000	181.626
			283730000	181.951
			283927000	182.277
			284124000	182.603
			284322000	182.929
			284519000	183.256
			284717000	183.582
			284914000	183.909
			285111000	184.237
			285309000	184.564
			285506000	184.892
			285704000	185.22
			285901000	185.548
			286098000	185.876
			286296000	186.205
			286493000	186.533
			286691000	186.862
			286888000	187.192
			287085000	187.521
			287283000	187.851
			287480000	188.181
			287678000	188.511
			287875000	188.841
			288072000	189.172
			288270000	189.503
			288467000	189.834
			288665000	190.165
			288862000	190.497
			289059000	190.829
			289257000	191.16
			289454000	191.493
			289652000	191.825
			289849000	192.158
			290046000	192.49
			290244000	192.824
			290441000	193.157
			290639000	193.49
			290836000	193.824
			291033000	194.158
			291231000	194.492
			291428000	194.826
			291626000	195.161
			291823000	195.496
			292020000	195.831
			292218000	196.166
			292415000	196.501
			292613000	196.837
			292810000	197.173
			293007000	197.509
			293205000	197.845
			293402000	198.182
			293600000	198.518
			293797000	198.855
			293994000	199.192
			294192000	199.53
			294389000	199.867
			294587000	200.205
			294784000	200.543
			294981000	200.881
			295179000	201.219
			295376000	201.558
			295574000	201.897
			295771000	202.236
			295968000	202.575
			296166000	202.914
			296363000	203.254
			296561000	203.593
			296758000	203.933
			296955000	204.274
			297153000	204.614
			297350000	204.954
			297548000	205.295
			297745000	205.636
			297942000	205.977
			298140000	206.319
			298337000	206.66
			298535000	207.002
			298732000	207.344
			298929000	207.686
			299127000	208.028
			299324000	208.371
			299522000	208.714
			299719000	209.056
			299916000	209.399
			300114000	209.743
			300311000	210.086
			300509000	210.43
			300706000	210.774
			300903000	211.118
			301101000	211.462
			301298000	211.806
			301496000	212.151
			301693000	212.496
			301890000	212.841
			302088000	213.186
			302285000	213.531
			302483000	213.877
			302680000	214.222
			302877000	214.568
			303075000	214.914
			303272000	215.26
			303470000	215.607
			303667000	215.953
			303864000	216.3
			304062000	216.647
			304259000	216.994
			304457000	217.342
			304654000	217.689
			304851000	218.037
			305049000	218.385
			305246000	218.733
			305444000	219.081
			305641000	219.429
			305838000	219.778
			306036000	220.126
			306233000	220.475
			306431000	220.824
			306628000	221.173
			306825000	221.523
			307023000	221.872
			307220000	222.222
			307418000	222.572
			307615000	222.922
			307812000	223.272
			308010000	223.623
			308207000	223.973
			308405000	224.324
			308602000	224.675
			308799000	225.026
			308997000	225.377
			309194000	225.728
			309392000	226.08
			309589000	226.431
			309786000	226.783
			309984000	227.135
			310181000	227.487
			310379000	227.84
			310576000	228.192
			310773000	228.545
			310971000	228.898
			311168000	229.25
			311366000	229.604
			311563000	229.957
			311760000	230.31
			311958000	230.664
			312155000	231.017
			312353000	231.371
			312550000	231.725
			312747000	232.079
			312945000	232.434
			313142000	232.788
			313340000	233.143
			313537000	233.497
			313734000	233.852
			313932000	234.207
			314129000	234.563
			314327000	234.918
			314524000	235.273
			314721000	235.629
			314919000	235.985
			315116000	236.341
			315314000	236.697
			315511000	237.053
			315708000	237.409
			315906000	237.765
			316103000	238.122
			316301000	238.479
			316498000	238.836
			316695000	239.193
			316893000	239.55
			317090000	239.907
			317288000	240.264
			317485000	240.622
			317682000	240.98
			317880000	241.337
			318077000	241.695
			318275000	242.053
			318472000	242.412
			318669000	242.77
			318867000	243.128
			319064000	243.487
			319262000	243.846
			319459000	244.204
			319656000	244.563
			319854000	244.922
			320051000	245.282
			320249000	245.641
			320446000	246
			320643000	246.36
			320841000	246.72
			321038000	247.079
			321236000	247.439
			321433000	247.799
			321630000	248.159
			321828000	248.52
			322025000	248.88
			322223000	249.241
			322420000	249.601
			322617000	249.962
			322815000	250.323
			323012000	250.684
			323210000	251.045
			323407000	251.406
			323604000	251.767
			323802000	252.129
			323999000	252.49
			324197000	252.852
			324394000	253.214
			324591000	253.575
			324789000	253.937
			324986000	254.299
			325184000	254.662
			325381000	255.024
			325578000	255.386
			325776000	255.749
			325973000	256.111
			326171000	256.474
			326368000	256.837
			326565000	257.2
			326763000	257.563
			326960000	257.926
			327158000	258.289
			327355000	258.652
			327552000	259.015
			327750000	259.379
			327947000	259.742
			328145000	260.106
			328342000	260.47
			328539000	260.834
			328737000	261.197
			328934000	261.561
			329132000	261.926
			329329000	262.29
			329526000	262.654
			329724000	263.018
			329921000	263.383
			330119000	263.747
			330316000	264.112
			330513000	264.477
			330711000	264.841
			330908000	265.206
			331106000	265.571
			331303000	265.936
			331500000	266.301
			331698000	266.667
			331895000	267.032
			332093000	267.397
			332290000	267.763
			332487000	268.128
			332685000	268.494
			332882000	268.859
			333080000	269.225
			333277000	269.591
			333474000	269.957
			333672000	270.323
			333869000	270.689
			334067000	271.055
			334264000	271.421
			334461000	271.787
			334659000	272.153
			334856000	272.52
			335054000	272.886
			335251000	273.253
			335448000	273.619
			335646000	273.986
			335843000	274.352
			336041000	274.719
			336238000	275.086
			336435000	275.453
			336633000	275.82
			336830000	276.187
			337028000	276.554
			337225000	276.921
			337422000	277.288
			337620000	277.655
			337817000	278.022
			338015000	278.39
			338212000	278.757
			338409000	279.124
			338607000	279.492
			338804000	279.859
			339002000	280.227
			339199000	280.595
			339396000	280.962
			339594000	281.33
			339791000	281.698
			339989000	282.066
			340186000	282.433
			340383000	282.801
			340581000	283.169
			340778000	283.537
			340976000	283.905
			341173000	284.273
			341370000	284.641
			341568000	285.009
			341765000	285.378
			341963000	285.746
			342160000	286.114
			342357000	286.482
			342555000	286.851
			342752000	287.219
			342950000	287.587
			343147000	287.956
			343344000	288.324
			343542000	288.693
			343739000	289.061
			343937000	289.43
			344134000	289.798
			344331000	290.167
			344529000	290.536
			344726000	290.904
			344924000	291.273
			345121000	291.642
			345318000	292.01
			345516000	292.379
			345713000	292.748
			345911000	293.116
			346108000	293.485
			346305000	293.854
			346503000	294.223
			346700000	294.592
			346898000	294.961
			347095000	295.329
			347292000	295.698
			347490000	296.067
			347687000	296.436
			347885000	296.805
			348082000	297.174
			348279000	297.543
			348477000	297.912
			348674000	298.281
			348872000	298.65
			349069000	299.019
			349266000	299.388
			349464000	299.757
			349661000	300.126
			349859000	300.495
			350056000	300.864
			350253000	301.233
			350451000	301.602
			350648000	301.971
			350846000	302.34
			351043000	302.709
			351240000	303.078
			351438000	303.447
			351635000	303.816
			351833000	304.185
			352030000	304.554
			352227000	304.922
			352425000	305.291
			352622000	305.66
			352820000	306.029
			353017000	306.398
			353214000	306.767
			353412000	307.136
			353609000	307.505
			353807000	307.874
			354004000	308.242
			354201000	308.611
			354399000	308.98
			354596000	309.349
			354794000	309.718
			354991000	310.086
			355188000	310.455
			355386000	310.824
			355583000	311.192
			355781000	311.561
			355978000	311.93
			356175000	312.298
			356373000	312.667
			356570000	313.035
			356768000	313.404
			356965000	313.772
			357162000	314.141
			357360000	314.509
			357557000	314.878
			357755000	315.246
			357952000	315.614
			358149000	315.983
			358347000	316.351
			358544000	316.719
			358742000	317.087
			358939000	317.455
			359136000	317.823
			359334000	318.191
			359531000	318.559
			359729000	318.927
			359926000	319.295
			360123000	319.663
			360321000	320.031
			360518000	320.399
			360716000	320.766
			360913000	321.134
			361110000	321.502
			361308000	321.869
			361505000	322.237
			361703000	322.604
			361900000	322.972
			362097000	323.339
			362295000	323.706
			362492000	324.074
			362690000	324.441
			362887000	324.808
			363084000	325.175
			363282000	325.542
			363479000	325.909
			363677000	326.276
			363874000	326.643
			364071000	327.01
			364269000	327.376
			364466000	327.743
			364664000	328.11
			364861000	328.476
			365058000	328.842
			365256000	329.209
			365453000	329.575
			365651000	329.941
			365848000	330.307
			366045000	330.674
			366243000	331.04
			366440000	331.405
			366638000	331.771
			366835000	332.137
			367032000	332.503
			367230000	332.868
			367427000	333.234
			367625000	333.599
			367822000	333.965
			368019000	334.33
			368217000	334.695
			368414000	335.06
			368612000	335.425
			368809000	335.79
			369006000	336.155
			369204000	336.52
			369401000	336.885
			369599000	337.249
			369796000	337.614
			369993000	337.978
			370191000	338.342
			370388000	338.707
			370586000	339.071
			370783000	339.435
			370980000	339.799
			371178000	340.163
			371375000	340.526
			371573000	340.89
			371770000	341.253
			371967000	341.617
			372165000	341.98
			372362000	342.343
			372560000	342.706
			372757000	343.069
			372954000	343.432
			373152000	343.795
			373349000	344.158
			373547000	344.52
			373744000	344.883
			373941000	345.245
			374139000	345.607
			374336000	345.969
			374534000	346.331
			374731000	346.693
			374928000	347.055
			375126000	347.417
			375323000	347.778
			375521000	348.14
			375718000	348.501
			375915000	348.862
			376113000	349.223
			376310000	349.584
			376508000	349.945
			376705000	350.305
			376902000	350.666
			377100000	351.026
			377297000	351.386
			377495000	351.747
			377692000	352.107
			377889000	352.466
			378087000	352.826
			378284000	353.186
			378482000	353.545
			378679000	353.905
			378876000	354.264
			379074000	354.623
			379271000	354.982
			379469000	355.34
			379666000	355.699
			379863000	356.058
			380061000	356.416
			380258000	356.774
			380456000	357.132
			380653000	357.49
			380850000	357.848
			381048000	358.205
			381245000	358.563
			381443000	358.92
			381640000	359.277
			381837000	359.634
			382035000	359.991
			382232000	360.348
			382430000	360.704
			382627000	361.061
			382824000	361.417
			383022000	361.773
			383219000	362.129
			383417000	362.485
			383614000	362.84
			383811000	363.196
			384009000	363.551
			384206000	363.906
			384404000	364.261
			384601000	364.616
			384798000	364.97
			384996000	365.325
			385193000	365.679
			385391000	366.033
			385588000	366.387
			385785000	366.741
			385983000	367.094
			386180000	367.447
			386378000	367.801
			386575000	368.154
			386772000	368.506
			386970000	368.859
			387167000	369.212
			387365000	369.564
			387562000	369.916
			387759000	370.268
			387957000	370.62
			388154000	370.971
			388352000	371.323
			388549000	371.674
			388746000	372.025
			388944000	372.376
			389141000	372.726
			389339000	373.077
			389536000	373.427
			389733000	373.777
			389931000	374.127
			390128000	374.476
			390326000	374.826
			390523000	375.175
			390720000	375.524
			390918000	375.873
			391115000	376.222
			391313000	376.57
			391510000	376.918
			391707000	377.266
			391905000	377.614
			392102000	377.962
			392300000	378.309
			392497000	378.656
			392694000	379.003
			392892000	379.35
			393089000	379.697
			393287000	380.043
			393484000	380.389
			393681000	380.735
			393879000	381.081
			394076000	381.426
			394274000	381.772
			394471000	382.117
			394668000	382.462
			394866000	382.806
			395063000	383.151
			395261000	383.495
			395458000	383.839
			395655000	384.182
			395853000	384.526
			396050000	384.869
			396248000	385.212
			396445000	385.555
			396642000	385.898
			396840000	386.24
			397037000	386.582
			397235000	386.924
			397432000	387.266
			397629000	387.607
			397827000	387.948
			398024000	388.289
			398222000	388.63
			398419000	388.97
			398616000	389.311
			398814000	389.651
			399011000	389.99
			399209000	390.33
			399406000	390.669
			399603000	391.008
			399801000	391.347
			399998000	391.685
			400196000	392.024
			400393000	392.362
			400590000	392.699
			400788000	393.037
			400985000	393.374
			401183000	393.711
			401380000	394.048
			401577000	394.384
			401775000	394.721
			401972000	395.057
			402170000	395.392
			402367000	395.728
			402564000	396.063
			402762000	396.398
			402959000	396.732
			403157000	397.067
			403354000	397.401
			403551000	397.735
			403749000	398.068
			403946000	398.402
			404144000	398.735
			404341000	399.068
			404538000	399.4
			404736000	399.732
			404933000	400.064
			405131000	400.396
			405328000	400.727
			405525000	401.059
			405723000	401.389
			405920000	401.72
			406118000	402.05
			406315000	402.38
			406512000	402.71
			406710000	403.04
			406907000	403.369
			407105000	403.698
			407302000	404.026
			407499000	404.355
			407697000	404.683
			407894000	405.01
			408092000	405.338
			408289000	405.665
			408486000	405.992
			408684000	406.318
			408881000	406.645
			409079000	406.971
			409276000	407.296
			409473000	407.622
			409671000	407.947
			409868000	408.271
			410066000	408.596
			410263000	408.92
			410460000	409.244
			410658000	409.568
			410855000	409.891
			411053000	410.214
			411250000	410.536
			411447000	410.859
			411645000	411.181
			411842000	411.503
			412040000	411.824
			412237000	412.145
			412434000	412.466
			412632000	412.786
			412829000	413.107
			413027000	413.426
			413224000	413.746
			413421000	414.065
			413619000	414.384
			413816000	414.703
			414014000	415.021
			414211000	415.339
			414408000	415.656
			414606000	415.974
			414803000	416.291
			415001000	416.607
			415198000	416.923
			415395000	417.239
			415593000	417.555
			415790000	417.87
			415988000	418.185
			416185000	418.5
			416382000	418.814
			416580000	419.128
			416777000	419.442
			416975000	419.755
			417172000	420.068
			417369000	420.381
			417567000	420.693
			417764000	421.005
			417962000	421.317
			418159000	421.628
			418356000	421.939
			418554000	422.25
			418751000	422.56
			418949000	422.87
			419146000	423.179
			419343000	423.488
			419541000	423.797
			419738000	424.106
			419936000	424.414
			420133000	424.722
			420330000	425.029
			420528000	425.336
			420725000	425.643
			420923000	425.949
			421120000	426.255
			421317000	426.561
			421515000	426.866
			421712000	427.171
			421910000	427.476
			422107000	427.78
			422304000	428.084
			422502000	428.387
			422699000	428.69
			422897000	428.993
			423094000	429.296
			423291000	429.598
			423489000	429.899
			423686000	430.201
			423884000	430.501
			424081000	430.802
			424278000	431.102
			424476000	431.402
			424673000	431.701
			424871000	432
			425068000	432.299
			425265000	432.597
			425463000	432.895
			425660000	433.193
			425858000	433.49
			426055000	433.787
			426252000	434.083
			426450000	434.379
			426647000	434.675
			426845000	434.97
			427042000	435.265
			427239000	435.559
			427437000	435.853
			427634000	436.147
			427832000	436.44
