# Supplementary material for: Synergistic HNO3–H2SO4–NH3 upper tropospheric particle formation
Source: Nature. 2022 May 18;605(7910):483–9. doi: 10.1038/s41586-022-04605-4 (PMC9117139; doi:10.1038/s41586-022-04605-4)
Supplement: Supplementary file 9 — Source Data Extended Data Fig. 4 [file 41586_2022_4605_MOESM9_ESM.xlsx]

## Sheet: a
d N/d logd_p (cm^-3)
d_p (nm) Time (UTC)	10.2	10.6	10.9	11.3	11.8	12.2	12.6	13.1	13.6	14.1	14.6	15.1	15.7	16.3	16.8	17.5	18.1	18.8	19.5	20.2	20.9	21.7	22.5	23.3	24.1	25	25.9	26.9	27.9	28.9	30	31.1	32.2	33.4	34.6	35.9	37.2	38.5	40	41.4	42.9	44.5	46.1	47.8	49.6	51.4	53.3	55.2	57.3
20/11/2019 01:35	0	0	0	0	0	0	0	0	0	0	0	0	0	0	14.4	0	0	0	5.8	5.5	10.3	30.2	38.8	37.3	36	29.8	28.7	27.8	37.8	33.5	41.3	31	39.7	35.1	14.6	52.3	46.1	41.8	65	38.8	29.6	33.5	36.6	43.9	49.6	46.6	14.7	22.2	12.1
20/11/2019 01:40	0	0	0	0	0	0	0	0	0	0	0	0	0	0	0	13.6	6.4	0	11.6	16.6	4.9	-0.6	38	14.6	44.2	25.1	42.8	23.4	36.1	35.2	48.6	49.9	42.5	55.1	35.5	70.8	68.5	52.2	59.3	42.5	50.8	46.3	67.8	55	92	58.4	68.2	43.8	92.6
20/11/2019 01:45	0	0	0	0	0	0	0	0	0	0	0	0	8.2	0	14.4	0	12.9	18.3	17.5	11.1	33.3	12.4	27.9	41.5	43.6	21	18.7	67.1	35.2	50.7	76.8	79.3	59.6	113.8	96.5	42.2	117	108	102.1	98.2	97.3	101.5	104	106.1	119.2	95.6	123.7	123.9	103.4
20/11/2019 01:51	0	0	0	0	0	0	14.4	0	0	10.5	0	0	0	15.3	36	40.7	19.3	48.8	52.4	83.2	89.2	87.7	110.9	190.5	175.7	184.1	141.3	193.7	227	212.6	167.1	207.3	231	267.6	177.7	217.1	266.7	248.9	255.5	218.5	268.5	254.6	242.8	255.6	258.7	221.7	229.3	177	201.1
20/11/2019 01:56	0	0	0	0	0	0	0	12.9	46.4	0	19.3	26.5	8.2	53.7	28.8	81.3	109.3	143.1	96.3	160.8	213.6	108.8	248	256.7	273.3	440.2	530.5	631.8	733.3	713.6	771	813.7	874.7	961.5	969.7	1107	1243.1	1352.2	1369.9	1402.2	1722.3	1788.9	1850.5	1782.6	2056.5	2061.1	2055.9	2129.5	1946.7
20/11/2019 02:02	0	0	0	0	18.6	32.5	14.4	25.7	39.2	17	28.9	44.2	57.6	76.7	59.8	79.3	77.7	146.1	188.3	166.3	181.7	220.4	274.8	354.9	321.9	453.2	483.2	713	852.1	987.6	1346.3	1543.2	1465.6	1506.8	1656.8	1459.6	1646.3	1593.9	1657.1	1667.1	1849.3	1920.1	1970.4	2049.5	2184.5	2394	2590.2	2363.3	2626.1
20/11/2019 02:07	0	0	0	0	0	16.3	28.8	36.7	71.2	10.5	19.3	61.9	49.4	45.5	74.7	133.5	199.9	179.3	177.8	321.7	352.9	457.7	512.3	798.4	806.4	857.5	1019.1	1115.4	1270.7	1420.4	1288.7	1359.7	1392.9	1464.4	1653.7	1640.4	1686.1	1813.2	1787.6	1880.4	2107.1	1975.6	2020.9	2173.2	2310.6	2493.7	2578.8	2638.3	2966.5
20/11/2019 02:12	0	0	0	21.4	0	32.5	43.2	36.7	52.5	79.9	38.6	115	69.6	157.1	175.6	194.5	135.1	246.3	404.1	547.6	725.7	653.1	797.8	906.4	1054.9	1125.4	1074.8	1402.2	1405.5	1534.3	1510.1	1732.1	1631	1789	1863.1	1817.3	1954.9	2222.6	2158.4	2204.9	2349.5	2425	2528.4	2656	2688.8	2725.2	2730.4	2986	2948
20/11/2019 02:18	0	0	0	0	18.6	0	0	12.9	34.8	42	71.6	137.7	139.9	144.7	192.7	316.1	328.5	415.3	579.6	865.7	839.7	987	967.7	1301.9	1236.3	1444.4	1441.9	1660.6	1738.2	1942.5	1936.8	2003	2177.7	2631.2	2382.1	2589.4	2574.7	2617.1	2762.3	2815.9	2912.9	3038.7	2986.4	3137.7	3094.6	3240.4	3239.1	3322.8	3516.9
20/11/2019 02:23	0	0	0	0	0	0	14.4	90.1	50.8	121.9	115.7	221.1	209.5	264	334.8	380.6	597.7	662.4	757.9	876.6	1278.4	1226.8	1326.9	1461.8	1754.7	1576	2027.9	1977.6	2140.8	2274.2	2518.7	2486.4	2580.2	2824.5	3150.2	3225.7	3310.6	3406.7	3481	3615.4	3879.8	3917.1	3781.7	3923.2	3801.7	4044.4	4167.4	4265.4	4511.6
20/11/2019 02:28	0	0	0	0	18.6	32.5	72	25.7	39.2	111.2	154.4	123.8	337.5	297.6	510.4	641.3	772.8	987.4	1002.3	1357.9	1458.9	1842.4	1882.8	2039.4	2361	2579.4	2686.9	3127.2	3073.3	3256.4	3391.6	3691.9	3744.8	4007.1	4145	4117.5	4406.4	4365.7	4500	4734.6	5103.6	4987.7	4894	5194.6	5291.4	5439.1	5325.1	5475.8	5487.8
20/11/2019 02:34	0	0	0	0	18.6	16.3	28.8	75.3	71.2	136.4	106	194.5	377.9	590.4	752.9	816	982.4	1091.4	1411.5	1610.5	1942	2116.4	2329.1	2699.5	2837.5	3398.8	3499.8	3721.2	3748.5	4030.6	4266.4	4385.9	4901.6	4699.9	5064.4	5171.7	5260.5	5283.9	5579.8	5836.1	5774.5	5802.6	5954.3	5934.7	6513.3	6708.5	6539.9	6536.6	6773.7
20/11/2019 02:39	0	0	0	0	18.6	16.3	90.5	99.3	104.3	346.1	366.5	548.4	677.9	877.4	899.4	1104.3	1478.4	1795.2	2115.3	2203.3	2670	3018	3091	3592.3	3835.7	4194.8	4650.9	4866.7	5087.6	5438.4	5847.6	5804.6	6057	6171.9	6704.8	6622.4	6806.4	6886.8	7276.6	7074.9	7361.9	7542.7	7530.3	7492.9	7714.6	7707.1	7550.9	7831.6	7961.4
20/11/2019 02:45	0	0	0	0	37.2	43.9	148.3	167.3	243.4	304.1	406.6	564.6	653.3	670.3	923.1	1396.9	1766.2	1926.8	2433.7	2633.8	2834.7	3304.7	3903.9	3974.2	4346.9	5040.4	5589.2	5590.2	5730.5	6185.3	6616.2	6832	7638.6	7348.4	7376.5	8070.7	8189.4	8390.5	9012.8	8790.2	8910.2	8782.5	9403.8	9191.4	9289.6	9491.9	9690.4	9773.7	9312.6
20/11/2019 02:50	0	0	24.9	0	0	48.8	187.2	115.9	240.7	264.8	286.6	647.9	608.5	1011.9	1084.2	1301.1	1578.4	1940.5	2174.9	2489.3	2841.5	3239.7	3704.5	4484.7	4829.8	5358.1	5666.4	5997.5	6361.3	6813.2	7086.5	7420.3	7873.1	8064.3	8512	9207.5	9647.5	9640.3	10201.6	10188.2	10509.5	10536.8	10988.4	10910.8	10983.1	10918.1	11686.4	11494.7	11446.6
20/11/2019 02:55	0	29.1	0	21.4	92.9	43.9	33.2	25.7	97.2	174.4	293.4	296.9	555.2	587.3	848.2	937.3	1302.4	1479.4	1797.3	2248.4	2526.9	3214.8	3588.3	3952.4	4370.1	5116.3	5221.4	5676.9	6360.7	6824.2	7259.6	7551.3	8023.4	8757.6	8824.6	9333.9	9865.3	10094.2	10788	10632.6	11212.5	11391	11865.9	12085.6	12438.8	12418.4	12753.7	12780.1	13014.8
20/11/2019 03:01	0	0	0	21.4	37.2	16.3	28.8	103	139.1	73.5	81.3	261.5	324.8	249.2	386	506.4	598.8	719.9	813	1018.3	1281.1	1503.4	1881.1	2228.1	2653.2	2794.9	3293.4	3835.9	4224.5	5007.6	5596.8	5940.6	6511.2	7084.7	7720.1	8264.4	8828.2	9718.2	10181.2	10399.9	10959.2	11450.3	11960.3	12529.4	13030.9	13243.6	13331	13836.1	13841.4
20/11/2019 03:06	0	0	0	0	20	128.9	57.6	141.6	150.7	230.9	225.9	226.1	295.6	321.4	400.1	424.7	637.3	731.6	855.6	892.5	1040.2	1232.6	1495.4	1715.6	1924.9	2178	2432.6	2806.2	3148.3	3308.7	3778.5	4323.9	4648.8	5317.6	6060.9	6574.9	6938.7	7431	8574.8	9065.4	9845.9	10060.9	10739	11308.8	12134.4	12009.7	12921	13669.6	13792.3
20/11/2019 03:12	0	0	49.7	21.4	0	60.1	105.1	126.8	94.4	136.4	210.8	195.8	254.4	322.9	424.5	417.4	492.1	613.9	841.4	924.6	1048.9	1254.9	1395.7	1532.5	1658.1	1998.8	2226.2	2404.1	2642.1	3165.1	3418.5	3626.8	3808.4	4180.4	4852.3	5053.7	5892.3	6035.1	6772	7315.4	8079.1	8638.6	9266	10127.1	10672.3	11557.8	11925.8	12141.8	12731.4
20/11/2019 03:17	0	0	0	0	37.2	81.3	32.9	150.8	127.5	115.4	77.1	194.6	291.1	265.2	353.8	450.5	460.9	626.6	764.4	724.9	1021.5	1102.4	1208.3	1436.2	1545.8	1786.6	1960.3	2261	2328.3	2662	2707.2	3326.5	3427.2	3911.9	3998.9	4519.1	4803	5384.2	5815.8	6129.7	6833.6	7642.2	8363.1	8897.9	9510	9881.6	10507.7	11260.8	11995
20/11/2019 03:22	0	29.1	0	21.4	37.2	32.5	115.2	90.1	127.5	251.9	268.6	222.3	240.9	288.4	399.6	440	514.5	651.2	676.5	792.5	944	970.1	1266.1	1251.8	1260.9	1550.1	1739.7	2076.7	2136.7	2323.4	2634.7	2594.8	3048.8	3457.8	3440.2	4008.5	4501.7	4810.9	4994.2	5517.1	5999.6	6590.2	6967.4	7636.8	8202.4	8914.2	9388.2	10397.9	11095.5
20/11/2019 03:28	0	58.2	0	0	18.6	48.8	100.8	115.9	197	220.2	212.3	247.6	259	418	439.4	519	592.1	635.6	645.3	750.3	896.5	1094.5	1139.7	1288.9	1520.3	1664.1	1761	2134.3	2152.9	2503.2	2526.7	2733.9	3164.3	3201.2	3509.3	3694.7	4148.9	4560.3	5119.8	5426.9	6439.8	6527.9	6905.3	7375.7	7862.5	8592.8	9190.4	10064.2	10285.5
20/11/2019 03:33	0	0	24.9	0	0	81.3	100.8	115.9	57.9	188.9	212.1	336	324.9	402.6	399.1	521.3	540.3	586.7	679.7	817.3	840.9	1027.5	1040.6	1375.5	1358.9	1690.7	1797.4	1947	2124.7	2445.4	2742.9	2754.9	3036.5	3361.2	3571.4	4086.7	4572	4599	5147.4	5267.5	5821.6	6285.2	6487.8	7326	7990.7	8104.8	8760.1	9036.8	9287.6
20/11/2019 03:38	0	29.1	0	0	0	43.9	119.5	202.2	112.2	174.4	148.8	128.9	288.1	351.9	433.6	370.9	484	527.8	539.4	644.8	913.9	922.8	1168.5	1143.6	1398.8	1521.3	1719.8	1823.6	2088.9	2358.7	2349.9	2693.5	2801.2	2803.2	3281.1	3390.5	3963.9	4157.6	4284.5	4940	5450.3	5825.5	6356.6	6436.7	7082.6	7509.1	8401.7	8806.6	9473.4
20/11/2019 03:44	0	0	24.9	0	18.6	65.1	86.4	103	127.5	136.2	231.5	194.6	234.2	333.6	358	326.3	351	522.5	570.5	645.6	749.6	870.4	883	978.4	1261.6	1344.7	1727.1	1821.8	2037.7	2180.2	2327.7	2404.4	2514.8	2942.7	3236	3588.1	3657.7	3774.8	4138	4431	5257.1	5561.6	6035.3	6467.9	7358.8	7764	8425	8817.7	9007.3
20/11/2019 03:49	0	0	0	0	18.6	81.3	14.4	77.2	208.6	178.2	158.6	235	238	291.2	288.5	310.7	504.8	423.9	535.7	668	743.7	888.9	1052.4	1034.7	1112.7	1382.1	1430.8	1584.4	1656.4	1822	2131.8	2295.9	2467.6	2829	3012.5	3027.1	3424.5	3861.8	4315.2	4592.7	4889.6	5352.8	5422.5	5904.2	6831.7	7151.9	7310.6	8062.8	8146.8
20/11/2019 03:55	0	0	0	21.4	18.6	43.9	33.2	90.1	131.9	100.7	115.9	132.7	148.2	260.3	264.3	277.1	422.9	461.2	565.3	480.2	672	733.2	946	970.1	1148.4	1243.8	1353	1561.4	1797.5	1869	1901.2	2307.7	2327.9	2387.7	2881.6	3111.6	3559.7	3684.1	4143.3	4485.4	5065.5	4951	5589.8	6100.6	6239.8	6758.8	7352.4	7265	7736.5
20/11/2019 04:00	0	0	24.9	10.3	9.6	48.8	76.1	99.3	85.6	79.7	164.1	132.7	214	207.2	371.1	327.1	356.4	440	496.7	465.6	667.7	653.7	813.4	934.5	1118.4	1271.4	1271.1	1467.6	1502.2	1917.7	1919.4	2149.5	2292.1	2457.6	2666.6	2893.5	3123.4	3467	3607.9	4192.8	4434.2	4836.1	5574.9	5708.8	6344	6672.5	7227	7639.9	8231.3
20/11/2019 04:05	0	0	24.9	21.4	37.2	65.1	172.8	103	155.1	121.9	202.4	159.2	189.3	229.1	260.5	438.7	376.2	410.4	432.6	612.2	653	779.1	824.9	995	991.7	1146.9	1455	1142.2	1493.6	1826	1847.8	2024.7	2174.1	2285.9	2618.6	2604.6	2894.8	3417.5	3494.1	4055.4	4396.9	4793.1	4913.1	5568	5926.3	6275.8	6638.1	6980.2	7798.6
20/11/2019 04:11	0	0	0	0	37.2	60.1	105.1	152.6	175.5	188.5	299.2	230	189.3	222.5	283.3	323.2	367.1	377.4	373.9	505.8	558.3	682.6	806.6	884.1	960.1	1106.5	1044.5	1310.8	1528.4	1462.9	1733.6	1715.6	1923.7	2123.9	2368.1	2699.3	2883.1	2974.3	3239	3423.6	3899.6	4324.4	4698.6	5254.7	5696.7	5890.5	6386.6	7020.5	7323
20/11/2019 04:16	0	0	0	31.7	28.2	16.3	14.4	77.2	173.8	241.2	168.2	181.9	275.4	211.3	240	387.5	308.1	476.5	402.2	573.8	567.5	592.5	673.7	752.6	1072.4	1043.5	1073.7	1330	1405.1	1526.3	1786.7	1821	1808.7	2111.6	2275.2	2719.8	2812.6	3095.3	3293	3503.2	4131.6	4139.5	4496.1	4964.1	5291.3	5581	5710.9	6108.6	6524.2
20/11/2019 04:22	0	0	0	0	55.8	97.6	129.6	90.1	185.4	188.7	125.5	141.4	201.4	194.9	308	245	395.5	358.1	400.9	406	527.6	586.6	625.6	779.3	839.8	990.8	1009.1	1209.3	1307	1383.6	1509.8	1759.6	1858.2	2133.4	2296.1	2430.1	2694.9	2847.2	3210.5	3399.7	3815.6	3951	4459.4	4223.3	4964.9	5512.2	6086.6	6297.5	6584.7
20/11/2019 04:27	0	0	0	0	38.6	123.9	133.9	154.5	162.2	199.2	259.2	98.5	131.7	206.6	245.6	228.6	324.2	367.4	437.8	421.2	573.6	506.7	731.9	715.9	800.8	978.2	968.9	1134.7	1158.1	1370.5	1577.1	1754.3	1848.8	2019.9	1990.5	2420	2521	2677.4	2933.7	3290.8	3531.1	3831.7	4065.3	4580.5	5048	5219.7	5442.2	5880.3	6365.3
20/11/2019 04:32	0	0	0	0	0	81.3	129.6	128.7	182.7	201.6	212.3	221.1	254.4	276.9	234.9	192.5	354.8	364.7	338.1	397.6	461.7	537.1	707.6	693.6	851.4	900.9	1059.9	1084.4	1176.6	1228.6	1463.3	1539.3	1672.7	2023.7	1937.2	2184	2387.1	2658.4	2917.6	3282.6	3426.9	3886.5	3959.7	4275.1	4677.8	4935.5	5356.5	5358.9	5795.6
20/11/2019 04:38	50.8	0	0	0	74.3	16.3	43.2	126.8	245.1	220.2	268.8	328.4	291.1	241.7	303.8	301.4	312	317.5	367.4	389.3	531.8	592.9	672.4	563.7	724.1	871.3	1001.8	1033.7	1127.3	1320.3	1374.7	1682.8	1843.1	1837.9	1908.7	2040.3	2400	2557.9	2791.8	3008.4	3175.5	3599.3	3742.6	3940.9	4526.3	4714.8	5074.1	5105.3	5417.8
20/11/2019 04:43	0	0	0	0	18.6	65.1	57.6	75.3	172.9	233.3	268.6	310.7	270.9	322.4	375.4	336.9	324.9	379.8	384.8	458.3	516.7	528.3	654.4	711.5	836.5	854.9	931.3	1107.7	1200.3	1352.5	1416.6	1463.8	1650.4	1676.1	1873.7	2054.8	2251.8	2450.9	2487.7	2713.4	3094.5	3465.6	3777.7	3869.9	4093.7	4469.2	4728.2	4902.2	5149.2
20/11/2019 04:48	0	0	0	21.4	18.6	48.8	72	165.4	129.2	314.8	337.4	397.9	451.3	367	427.9	459	419.7	325.6	497.2	409.9	461.4	550.4	745.4	681.5	733.8	908.2	866.4	1000.7	1060.5	1282.3	1348	1357	1462.5	1675.5	1863.7	2025.6	2094.4	2207.5	2707.4	2650	3002.5	3270.4	3304	3505.8	3785.3	4197.9	4378.2	4760	4906.6
20/11/2019 04:54	0	0	20.5	3.7	0	32.5	76.1	71.6	117.6	293.4	308.9	353.7	394.4	505.5	486.6	516.3	557.4	529.6	457.8	582	542	644.2	623.1	655.8	820.7	810.2	905.5	1061.4	1077.7	1042.5	1173.2	1225.5	1471.6	1563.1	1784.2	1833.9	2052.6	2180.7	2536.2	2637	2811.9	2971	3239.5	3718.8	3670.1	4303.9	4275.3	4415.9	4740.1
20/11/2019 04:59	0	0	24.9	0	1.4	47.5	43.2	62.5	106	177.8	203	300.7	340.5	441.2	596.4	497.3	425.6	590.6	627.8	572.4	495.3	554.7	757.1	742.7	737.6	709.3	772.9	891	976	1070.7	1120.9	1237.3	1331.7	1537.1	1576.7	1707.6	1882.5	2052.1	2331.2	2439.5	2684.5	2991.9	3048.9	3286	3461.1	3737.7	4233.3	4232.4	4543.5
20/11/2019 05:05	0	0	0	0	0	0	43.2	25.7	81.1	115.4	212.1	274.1	386.2	467.7	425.5	634.2	622.8	616.1	572.3	609.8	636.7	653	632.3	572.3	689.4	809.6	902.5	918.3	888.4	1017.6	1107.8	1218.7	1376.3	1449.1	1679.6	1750.8	1870.6	1977.3	2131.8	2286.9	2477.3	2571.6	2936.6	3043.3	3210.3	3670.6	3636.2	4299.4	4343.5
20/11/2019 05:10	0	0	0	0	0	16.3	43.2	75.3	24.9	104.7	144.8	291.8	267.2	347.9	541.4	580	616.3	562.5	654.5	707.6	628.6	655.5	739.3	713.2	733.8	751.5	880.4	867.4	943.4	1080.3	1046.9	1149.6	1285.5	1274.2	1481.6	1548.3	1865	1762.9	1884.9	2253.1	2371.3	2552.7	2648.4	2958.3	3262.4	3397.2	3748.3	3813.5	4136.5
20/11/2019 05:15	0	0	0	0	0	0	28.8	25.7	62.4	111.2	154.4	185.7	209.5	372.5	436	489.7	518.2	571.3	697.6	798.1	700.4	732	803.1	748.7	877.3	736.4	791.6	815.8	868.5	1035.3	1108.9	1260.5	1275.4	1329.8	1382.6	1600.9	1629.3	1786.5	1853.2	2011.3	2299.9	2470.8	2651.6	2923.9	2955.5	3410.6	3300.5	3619.4	3951.7
20/11/2019 05:21	0	0	0	0	0	0	14.4	12.9	23.2	42	86.8	159.1	107.1	282.8	419.1	470.8	596.5	626.8	569.3	675.5	802.8	788.8	738.4	711.9	898.7	928.6	952	956	1015.4	1028.4	955.1	1012.6	1225.5	1171.3	1505.2	1330.4	1702.5	1661.3	1847.3	2044.2	2162.3	2279.4	2376.8	2559.7	2771.2	3052.3	3350.6	3626.2	3776
20/11/2019 05:26	0	29.1	0	0	0	0	0	0	23.2	63	28.9	132.6	176.6	196	357.5	331.3	578.2	634.6	704.2	622	645.1	889.8	895.9	918.3	862.2	873.2	988.1	1065.4	987.1	1060.6	1117.3	1094.1	1283.2	1320.8	1411.2	1373	1459.4	1599	1827.6	1951.9	1925.8	2009.2	2138.9	2452.2	2724.7	2771.7	3267.9	3199.2	3481.5
20/11/2019 05:32	0	0	0	0	0	0	0	12.9	23.2	31.5	33.1	102.3	151.9	164.8	211.7	280.8	356.4	453.6	615.9	623.3	771.1	829.7	825	908.2	961.4	952.2	922.7	1105.6	1093.8	1165.1	1039.5	1101.4	1150.2	1218.7	1229.9	1467.4	1520.4	1441.1	1739.9	1786.9	1984.1	2082	2264.2	2432.3	2808.1	2852	2949.8	3219.3	3206.5
20/11/2019 05:37	0	0	0	0	0	0	0	0	0	41.8	48.4	26.5	98.8	153.5	173	265.8	269.6	383	463.7	532.1	668.9	718.7	865.8	896.6	1029.5	1071.1	1087	1072.6	1156.9	1112.2	1223.6	1150.1	1326	1332.2	1229.8	1435.9	1450.9	1609.1	1394.5	1917.6	1955.8	1978.4	2154.3	2114.5	2436	2713.3	2884.2	3096.6	3222.4
20/11/2019 05:42	0	0	0	0	0	0	0	12.9	0	10.5	28.9	44.2	53.1	103.4	94.2	198.1	269.6	353.2	454.7	409.6	561.3	659.4	760.6	833.2	1036.7	1064.2	1112.1	1051	1159.4	1119.6	1251.3	1083.9	1254.7	1181.9	1441.3	1378.3	1449.2	1515.8	1677.4	1748.8	1846.4	2060.1	2118.4	2330.5	2378.6	2626.1	2661.6	2979	2926.4
20/11/2019 05:48	0	0	0	0	0	0	0	0	11.6	10.5	48.2	44.2	41.2	76.7	81.4	187.7	161.3	185.4	263.8	319.2	528.6	515.7	725.5	822.9	910.4	929.6	1052.3	1182.7	1142.6	1245.5	1137.5	1212.3	1230.8	1346.7	1378.1	1371.9	1447.2	1492.6	1544.3	1701.9	1696.1	1951.7	2033.4	2046.2	2414.9	2564.8	2742.6	2810.4	2925.3
20/11/2019 05:53	0	29.1	0	0	0	0	0	0	0	21	28.9	61.9	57.6	53.2	79.8	120.2	169.4	146.1	174.5	301.4	431.5	586.3	627.6	799	1024.6	915.9	1089.5	1094.2	1173.3	1246.3	1252	1224.3	1319.3	1382.8	1426	1394.6	1435.5	1517	1531.1	1649.1	1670.1	1843.5	2036.5	2199.8	2233.9	2435	2521.9	2609.5	2779.6
20/11/2019 05:58	0	0	0	0	0	16.3	0	0	23.2	10.5	9.6	8.8	41.2	53.7	43.3	61	96.5	124.8	294.2	247.9	390.6	444.3	538.3	634.1	746.2	825.2	1017.7	1090.3	1155.4	1250	1287.6	1270.3	1288.2	1335.8	1449.6	1553.5	1495.7	1691.3	1459.8	1741.4	1609.5	1770.2	1893.3	1980.1	2158.2	2364.7	2292.7	2457.3	2585
20/11/2019 06:04	0	0	0	0	0	0	0	0	0	0	13.8	5	16.5	61.4	36	67.8	135.1	122.1	179.1	242.5	341.2	354.9	466.8	473.1	597.5	686.8	873.5	1003.4	988.5	1112.6	1315.6	1365.9	1314	1400.3	1516.3	1525.8	1516.4	1423.6	1583.8	1622.6	1810.4	1834.6	1945.4	1959.9	2043.2	2163.7	2183	2431.9	2510.5
20/11/2019 06:09	0	0	0	0	0	0	0	0	11.6	10.5	0	0	24.7	15.3	64.9	61	58.4	99.9	170.7	189.7	159.8	304.6	293.9	454.2	518.3	600.2	657	836.5	799.1	1002.6	1037.4	1200.8	1257.3	1270.4	1333.3	1391.5	1460.5	1500.7	1434.3	1652.4	1663.9	1757.1	1901.7	1939.2	2003.6	2316.5	2356	2246.6	2469.5
20/11/2019 06:15	0	0	24.9	0	0	0	0	0	0	10.5	9.6	0	0	38.4	31	25.1	70.7	36.6	138.4	134.3	130.7	240.1	262.8	411.8	413.9	513.1	497.2	780.1	849.7	997.6	1084.5	1023	1201	1316.6	1307.5	1367.8	1547.1	1622.8	1588.9	1608.5	1575.6	1806.2	1959.9	1870.8	1957.4	2203.4	2141.3	2310.2	2260.1
20/11/2019 06:20	0	0	0	0	0	0	0	0	0	0	9.6	8.8	8.2	38.4	28.8	20.3	45	97.7	104.7	99.8	81.9	203.5	216.1	274.7	353.1	468.3	484.6	700.6	665.1	876.3	943.8	1012.4	1191.3	1283.7	1331.3	1452.1	1439.8	1384.5	1535	1613.1	1729.9	1667.7	1765.4	1871.3	1910.5	2103.4	2142.9	2267.8	2288
20/11/2019 06:25	0	0	0	0	0	0	0	0	11.6	0	19.3	8.8	0	0	21.6	20.3	33.2	56.7	26.5	116.5	122	156.6	180.4	134.8	335.9	283.1	468.2	511.4	626.2	692.4	723.3	906.5	1074	1126.6	1275.7	1283.4	1382.8	1407	1425.5	1639	1598.9	1583.5	1764	1787	2006.8	1878.3	2082.3	2203.7	2232
[truncated: 57 more columns]

## Sheet: b
Time (UTC)	H2SO4 conc. (cm^-3)
20/11/2019 01:30:00	1050000
20/11/2019 01:30:01	1050000
20/11/2019 01:30:02	1050000
20/11/2019 01:30:03	1040000
20/11/2019 01:30:04	1050000
20/11/2019 01:30:05	1040000
20/11/2019 01:30:06	1040000
20/11/2019 01:30:07	1040000
20/11/2019 01:30:09	1040000
20/11/2019 01:30:10	1040000
20/11/2019 01:30:11	1040000
20/11/2019 01:30:12	1030000
20/11/2019 01:30:13	1040000
20/11/2019 01:30:14	1050000
20/11/2019 01:30:15	1060000
20/11/2019 01:30:16	1070000
20/11/2019 01:30:18	1070000
20/11/2019 01:30:19	1070000
20/11/2019 01:30:20	1070000
20/11/2019 01:30:21	1070000
20/11/2019 01:30:22	1040000
20/11/2019 01:30:23	1040000
20/11/2019 01:30:24	1040000
20/11/2019 01:30:25	1030000
20/11/2019 01:30:26	1030000
20/11/2019 01:30:28	1030000
20/11/2019 01:30:29	1020000
20/11/2019 01:30:30	1020000
20/11/2019 01:30:31	1020000
20/11/2019 01:30:32	1010000
20/11/2019 01:30:33	1020000
20/11/2019 01:30:34	1010000
20/11/2019 01:30:35	985000
20/11/2019 01:30:36	955000
20/11/2019 01:30:38	960000
20/11/2019 01:30:39	966000
20/11/2019 01:30:40	939000
20/11/2019 01:30:41	912000
20/11/2019 01:30:42	887000
20/11/2019 01:30:43	885000
20/11/2019 01:30:44	884000
20/11/2019 01:30:45	888000
20/11/2019 01:30:46	889000
20/11/2019 01:30:48	885000
20/11/2019 01:30:49	869000
20/11/2019 01:30:50	868000
20/11/2019 01:30:51	868000
20/11/2019 01:30:52	878000
20/11/2019 01:30:53	893000
20/11/2019 01:30:54	894000
20/11/2019 01:30:55	897000
20/11/2019 01:30:57	896000
20/11/2019 01:30:58	896000
20/11/2019 01:30:59	907000
20/11/2019 01:31:00	904000
20/11/2019 01:31:01	901000
20/11/2019 01:31:02	901000
20/11/2019 01:31:03	900000
20/11/2019 01:31:04	913000
20/11/2019 01:31:05	927000
20/11/2019 01:31:07	934000
20/11/2019 01:31:08	937000
20/11/2019 01:31:09	938000
20/11/2019 01:31:10	940000
20/11/2019 01:31:11	931000
20/11/2019 01:31:12	930000
20/11/2019 01:31:13	926000
20/11/2019 01:31:14	939000
20/11/2019 01:31:15	951000
20/11/2019 01:31:17	965000
20/11/2019 01:31:18	973000
20/11/2019 01:31:19	967000
20/11/2019 01:31:20	965000
20/11/2019 01:31:21	962000
20/11/2019 01:31:22	961000
20/11/2019 01:31:23	963000
20/11/2019 01:31:24	960000
20/11/2019 01:31:26	952000
20/11/2019 01:31:27	942000
20/11/2019 01:31:28	948000
20/11/2019 01:31:29	936000
20/11/2019 01:31:30	936000
20/11/2019 01:31:31	937000
20/11/2019 01:31:32	942000
20/11/2019 01:31:33	954000
20/11/2019 01:31:34	949000
20/11/2019 01:31:36	947000
20/11/2019 01:31:37	947000
20/11/2019 01:31:38	939000
20/11/2019 01:31:39	942000
20/11/2019 01:31:40	949000
20/11/2019 01:31:41	952000
20/11/2019 01:31:42	969000
20/11/2019 01:31:43	957000
20/11/2019 01:31:45	964000
20/11/2019 01:31:46	973000
20/11/2019 01:31:47	987000
20/11/2019 01:31:48	976000
20/11/2019 01:31:49	972000
20/11/2019 01:31:50	973000
20/11/2019 01:31:51	973000
20/11/2019 01:31:52	972000
20/11/2019 01:31:54	971000
20/11/2019 01:31:55	966000
20/11/2019 01:31:56	967000
20/11/2019 01:31:57	969000
20/11/2019 01:31:58	978000
20/11/2019 01:31:59	978000
20/11/2019 01:32:00	984000
20/11/2019 01:32:01	989000
20/11/2019 01:32:02	996000
20/11/2019 01:32:04	1000000
20/11/2019 01:32:05	1010000
20/11/2019 01:32:06	1010000
20/11/2019 01:32:07	1020000
20/11/2019 01:32:08	1020000
20/11/2019 01:32:09	1030000
20/11/2019 01:32:10	1030000
20/11/2019 01:32:11	1030000
20/11/2019 01:32:12	1040000
20/11/2019 01:32:14	1030000
20/11/2019 01:32:15	1010000
20/11/2019 01:32:16	1010000
20/11/2019 01:32:17	997000
20/11/2019 01:32:18	1020000
20/11/2019 01:32:19	1020000
20/11/2019 01:32:20	1030000
20/11/2019 01:32:21	1040000
20/11/2019 01:32:22	1030000
20/11/2019 01:32:24	1050000
20/11/2019 01:32:25	1050000
20/11/2019 01:32:26	1020000
20/11/2019 01:32:27	989000
20/11/2019 01:32:28	1000000
20/11/2019 01:32:29	992000
20/11/2019 01:32:30	992000
20/11/2019 01:32:31	992000
20/11/2019 01:32:32	987000
20/11/2019 01:32:34	988000
20/11/2019 01:32:35	1020000
20/11/2019 01:32:36	1040000
20/11/2019 01:32:37	1040000
20/11/2019 01:32:38	1040000
20/11/2019 01:32:39	1040000
20/11/2019 01:32:40	1060000
20/11/2019 01:32:41	1080000
20/11/2019 01:32:42	1090000
20/11/2019 01:32:44	1100000
20/11/2019 01:32:45	1100000
20/11/2019 01:32:46	1090000
20/11/2019 01:32:47	1080000
20/11/2019 01:32:48	1080000
20/11/2019 01:32:49	1100000
20/11/2019 01:32:50	1100000
20/11/2019 01:32:51	1100000
20/11/2019 01:32:53	1100000
20/11/2019 01:32:54	1090000
20/11/2019 01:32:55	1100000
20/11/2019 01:32:56	1110000
20/11/2019 01:32:57	1120000
20/11/2019 01:32:58	1120000
20/11/2019 01:32:59	1120000
20/11/2019 01:33:00	1130000
20/11/2019 01:33:01	1150000
20/11/2019 01:33:03	1160000
20/11/2019 01:33:04	1150000
20/11/2019 01:33:05	1140000
20/11/2019 01:33:06	1120000
20/11/2019 01:33:07	1120000
20/11/2019 01:33:08	1120000
20/11/2019 01:33:09	1120000
20/11/2019 01:33:10	1120000
20/11/2019 01:33:11	1110000
20/11/2019 01:33:13	1110000
20/11/2019 01:33:14	1110000
20/11/2019 01:33:15	1120000
20/11/2019 01:33:16	1120000
20/11/2019 01:33:17	1120000
20/11/2019 01:33:18	1140000
20/11/2019 01:33:19	1140000
20/11/2019 01:33:20	1130000
20/11/2019 01:33:22	1120000
20/11/2019 01:33:23	1130000
20/11/2019 01:33:24	1130000
20/11/2019 01:33:25	1150000
20/11/2019 01:33:26	1180000
20/11/2019 01:33:27	1190000
20/11/2019 01:33:28	1200000
20/11/2019 01:33:29	1190000
20/11/2019 01:33:30	1200000
20/11/2019 01:33:32	1220000
20/11/2019 01:33:33	1220000
20/11/2019 01:33:34	1220000
20/11/2019 01:33:35	1200000
20/11/2019 01:33:36	1190000
20/11/2019 01:33:37	1180000
20/11/2019 01:33:38	1180000
20/11/2019 01:33:39	1180000
20/11/2019 01:33:40	1180000
20/11/2019 01:33:42	1180000
20/11/2019 01:33:43	1180000
20/11/2019 01:33:44	1180000
20/11/2019 01:33:45	1170000
20/11/2019 01:33:46	1170000
20/11/2019 01:33:47	1180000
20/11/2019 01:33:48	1190000
20/11/2019 01:33:49	1190000
20/11/2019 01:33:50	1190000
20/11/2019 01:33:52	1200000
20/11/2019 01:33:53	1200000
20/11/2019 01:33:54	1190000
20/11/2019 01:33:55	1190000
20/11/2019 01:33:56	1200000
20/11/2019 01:33:57	1220000
20/11/2019 01:33:58	1220000
20/11/2019 01:33:59	1220000
20/11/2019 01:34:00	1220000
20/11/2019 01:34:02	1220000
20/11/2019 01:34:03	1210000
20/11/2019 01:34:04	1210000
20/11/2019 01:34:05	1210000
20/11/2019 01:34:10	1210000
20/11/2019 01:34:11	1210000
20/11/2019 01:34:13	1220000
20/11/2019 01:34:14	1220000
20/11/2019 01:34:15	1220000
20/11/2019 01:34:16	1220000
20/11/2019 01:34:17	1210000
20/11/2019 01:34:18	1210000
20/11/2019 01:34:19	1200000
20/11/2019 01:34:20	1200000
20/11/2019 01:34:21	1210000
20/11/2019 01:34:23	1220000
20/11/2019 01:34:24	1230000
20/11/2019 01:34:25	1250000
20/11/2019 01:34:26	1270000
20/11/2019 01:34:27	1290000
20/11/2019 01:34:28	1300000
20/11/2019 01:34:29	1290000
20/11/2019 01:34:30	1290000
20/11/2019 01:34:31	1290000
20/11/2019 01:34:33	1300000
20/11/2019 01:34:34	1310000
20/11/2019 01:34:35	1310000
20/11/2019 01:34:36	1310000
20/11/2019 01:34:37	1300000
20/11/2019 01:34:38	1300000
20/11/2019 01:34:39	1300000
20/11/2019 01:34:40	1290000
20/11/2019 01:34:41	1280000
20/11/2019 01:34:43	1280000
20/11/2019 01:34:44	1280000
20/11/2019 01:34:45	1290000
20/11/2019 01:34:46	1290000
20/11/2019 01:34:47	1290000
20/11/2019 01:34:48	1290000
20/11/2019 01:34:49	1300000
20/11/2019 01:34:50	1320000
20/11/2019 01:34:51	1320000
20/11/2019 01:34:53	1310000
20/11/2019 01:34:54	1300000
20/11/2019 01:34:55	1310000
20/11/2019 01:34:56	1320000
20/11/2019 01:34:57	1330000
20/11/2019 01:34:58	1320000
20/11/2019 01:34:59	1320000
20/11/2019 01:35:00	1320000
20/11/2019 01:35:01	1330000
20/11/2019 01:35:03	1340000
20/11/2019 01:35:04	1330000
20/11/2019 01:35:05	1330000
20/11/2019 01:35:06	1320000
20/11/2019 01:35:07	1310000
20/11/2019 01:35:08	1310000
20/11/2019 01:35:09	1310000
20/11/2019 01:35:10	1300000
20/11/2019 01:35:11	1310000
20/11/2019 01:35:13	1310000
20/11/2019 01:35:14	1310000
20/11/2019 01:35:15	1320000
20/11/2019 01:35:16	1330000
20/11/2019 01:35:17	1330000
20/11/2019 01:35:18	1340000
20/11/2019 01:35:19	1350000
20/11/2019 01:35:20	1360000
20/11/2019 01:35:22	1370000
20/11/2019 01:35:23	1360000
20/11/2019 01:35:24	1360000
20/11/2019 01:35:25	1360000
20/11/2019 01:35:26	1350000
20/11/2019 01:35:27	1340000
20/11/2019 01:35:28	1350000
20/11/2019 01:35:29	1340000
20/11/2019 01:35:30	1340000
20/11/2019 01:35:32	1330000
20/11/2019 01:35:33	1330000
20/11/2019 01:35:34	1330000
20/11/2019 01:35:35	1330000
20/11/2019 01:35:36	1330000
20/11/2019 01:35:37	1320000
20/11/2019 01:35:38	1320000
20/11/2019 01:35:39	1350000
20/11/2019 01:35:40	1370000
20/11/2019 01:35:42	1390000
20/11/2019 01:35:43	1390000
20/11/2019 01:35:44	1380000
20/11/2019 01:35:45	1380000
20/11/2019 01:35:46	1380000
20/11/2019 01:35:47	1390000
20/11/2019 01:35:48	1380000
20/11/2019 01:35:49	1370000
20/11/2019 01:35:50	1370000
20/11/2019 01:35:52	1380000
20/11/2019 01:35:53	1370000
20/11/2019 01:35:54	1370000
20/11/2019 01:35:55	1370000
20/11/2019 01:35:56	1380000
20/11/2019 01:35:57	1370000
20/11/2019 01:35:58	1370000
20/11/2019 01:35:59	1340000
20/11/2019 01:36:01	1310000
20/11/2019 01:36:02	1310000
20/11/2019 01:36:03	1300000
20/11/2019 01:36:04	1290000
20/11/2019 01:36:05	1260000
20/11/2019 01:36:06	1240000
20/11/2019 01:36:07	1230000
20/11/2019 01:36:08	1220000
20/11/2019 01:36:09	1220000
20/11/2019 01:36:11	1220000
20/11/2019 01:36:12	1210000
20/11/2019 01:36:13	1210000
20/11/2019 01:36:14	1190000
20/11/2019 01:36:15	1200000
20/11/2019 01:36:16	1200000
20/11/2019 01:36:17	1200000
20/11/2019 01:36:18	1210000
20/11/2019 01:36:19	1190000
20/11/2019 01:36:21	1180000
20/11/2019 01:36:22	1180000
20/11/2019 01:36:23	1170000
20/11/2019 01:36:24	1180000
20/11/2019 01:36:25	1160000
20/11/2019 01:36:26	1150000
20/11/2019 01:36:27	1140000
20/11/2019 01:36:28	1150000
20/11/2019 01:36:29	1150000
20/11/2019 01:36:31	1150000
20/11/2019 01:36:32	1140000
20/11/2019 01:36:33	1140000
20/11/2019 01:36:34	1150000
20/11/2019 01:36:35	1150000
20/11/2019 01:36:36	1160000
20/11/2019 01:36:37	1160000
20/11/2019 01:36:38	1170000
20/11/2019 01:36:40	1150000
20/11/2019 01:36:41	1140000
20/11/2019 01:36:42	1130000
20/11/2019 01:36:43	1130000
20/11/2019 01:36:44	1130000
20/11/2019 01:36:45	1130000
20/11/2019 01:36:46	1140000
20/11/2019 01:36:47	1120000
20/11/2019 01:36:48	1120000
20/11/2019 01:36:50	1100000
20/11/2019 01:36:51	1090000
20/11/2019 01:36:52	1090000
20/11/2019 01:36:53	1090000
20/11/2019 01:36:54	1090000
20/11/2019 01:36:55	1080000
20/11/2019 01:36:56	1080000
20/11/2019 01:36:57	1080000
20/11/2019 01:36:58	1080000
20/11/2019 01:36:59	1090000
20/11/2019 01:37:01	1090000
20/11/2019 01:37:02	1100000
20/11/2019 01:37:03	1090000
20/11/2019 01:37:04	1100000
20/11/2019 01:37:05	1110000
20/11/2019 01:37:06	1100000
20/11/2019 01:37:07	1100000
20/11/2019 01:37:08	1100000
20/11/2019 01:37:10	1100000
20/11/2019 01:37:11	1100000
20/11/2019 01:37:12	1110000
20/11/2019 01:37:13	1110000
20/11/2019 01:37:14	1130000
20/11/2019 01:37:15	1140000
20/11/2019 01:37:16	1140000
20/11/2019 01:37:17	1140000
20/11/2019 01:37:18	1140000
20/11/2019 01:37:20	1130000
20/11/2019 01:37:21	1120000
20/11/2019 01:37:22	1100000
20/11/2019 01:37:23	1100000
20/11/2019 01:37:24	1090000
20/11/2019 01:37:25	1090000
20/11/2019 01:37:26	1090000
20/11/2019 01:37:27	1090000
20/11/2019 01:37:28	1090000
20/11/2019 01:37:29	1110000
20/11/2019 01:37:31	1130000
20/11/2019 01:37:32	1130000
20/11/2019 01:37:33	1130000
20/11/2019 01:37:34	1140000
20/11/2019 01:37:35	1130000
20/11/2019 01:37:36	1140000
20/11/2019 01:37:37	1140000
20/11/2019 01:37:38	1140000
20/11/2019 01:37:40	1140000
20/11/2019 01:37:41	1130000
20/11/2019 01:37:42	1120000
20/11/2019 01:37:43	1120000
20/11/2019 01:37:44	1110000
20/11/2019 01:37:45	1110000
20/11/2019 01:37:46	1080000
20/11/2019 01:37:47	1070000
20/11/2019 01:37:48	1070000
20/11/2019 01:37:50	1060000
20/11/2019 01:37:51	1050000
20/11/2019 01:37:52	1050000
20/11/2019 01:37:53	1040000
20/11/2019 01:37:54	1030000
20/11/2019 01:37:55	1040000
20/11/2019 01:37:56	1040000
20/11/2019 01:37:57	1040000
20/11/2019 01:37:58	1040000
20/11/2019 01:38:00	1030000
20/11/2019 01:38:01	1020000
20/11/2019 01:38:02	1030000
20/11/2019 01:38:03	1020000
20/11/2019 01:38:04	1030000
20/11/2019 01:38:05	1040000
20/11/2019 01:38:06	1040000
20/11/2019 01:38:07	1030000
20/11/2019 01:38:08	1030000
20/11/2019 01:38:10	1020000
20/11/2019 01:38:11	1010000
20/11/2019 01:38:12	1010000
20/11/2019 01:38:13	1010000
20/11/2019 01:38:14	1010000
20/11/2019 01:38:15	1000000
20/11/2019 01:38:16	993000
20/11/2019 01:38:17	982000
20/11/2019 01:38:18	984000
20/11/2019 01:38:20	988000
20/11/2019 01:38:21	997000
20/11/2019 01:38:22	993000
20/11/2019 01:38:23	989000
20/11/2019 01:38:24	994000
20/11/2019 01:38:25	999000
20/11/2019 01:38:26	1000000
20/11/2019 01:38:27	1010000
20/11/2019 01:38:29	1010000
20/11/2019 01:38:30	1010000
20/11/2019 01:38:31	1010000
20/11/2019 01:38:32	987000
20/11/2019 01:38:33	989000
20/11/2019 01:38:34	989000
20/11/2019 01:38:35	979000
20/11/2019 01:38:36	977000
20/11/2019 01:38:37	974000
20/11/2019 01:38:39	960000
20/11/2019 01:38:40	951000
20/11/2019 01:38:41	941000
20/11/2019 01:38:42	936000
20/11/2019 01:38:43	949000
20/11/2019 01:38:44	949000
20/11/2019 01:38:45	944000
20/11/2019 01:38:46	940000
20/11/2019 01:38:48	933000
20/11/2019 01:38:49	920000
20/11/2019 01:38:50	924000
20/11/2019 01:38:51	926000
20/11/2019 01:38:52	925000
20/11/2019 01:38:53	924000
20/11/2019 01:38:54	925000
20/11/2019 01:38:55	930000
20/11/2019 01:38:56	932000
20/11/2019 01:38:58	931000
20/11/2019 01:38:59	931000
20/11/2019 01:39:00	905000
20/11/2019 01:39:01	887000
20/11/2019 01:39:02	883000
20/11/2019 01:39:03	878000
20/11/2019 01:39:04	877000
20/11/2019 01:39:05	876000
20/11/2019 01:39:07	881000
20/11/2019 01:39:08	877000
20/11/2019 01:39:09	878000
20/11/2019 01:39:10	885000
20/11/2019 01:39:11	898000
20/11/2019 01:39:12	901000
20/11/2019 01:39:13	916000
20/11/2019 01:39:14	909000
20/11/2019 01:39:16	909000
20/11/2019 01:39:17	922000
20/11/2019 01:39:18	923000
20/11/2019 01:39:19	928000
20/11/2019 01:39:20	931000
20/11/2019 01:39:21	948000
20/11/2019 01:39:22	958000
20/11/2019 01:39:23	958000
20/11/2019 01:39:24	961000
20/11/2019 01:39:26	980000
20/11/2019 01:39:27	997000
20/11/2019 01:39:28	1000000
20/11/2019 01:39:29	1010000
20/11/2019 01:39:30	1010000
20/11/2019 01:39:31	1010000
20/11/2019 01:39:32	1010000
20/11/2019 01:39:33	1020000
20/11/2019 01:39:35	1030000
20/11/2019 01:39:36	1020000
20/11/2019 01:39:37	1020000
20/11/2019 01:39:38	1030000
20/11/2019 01:39:39	1020000
20/11/2019 01:39:40	1020000
20/11/2019 01:39:41	1040000
20/11/2019 01:39:42	1040000
20/11/2019 01:39:44	1040000
20/11/2019 01:39:45	1030000
20/11/2019 01:39:46	1030000
20/11/2019 01:39:47	1020000
20/11/2019 01:39:48	1020000
20/11/2019 01:39:49	1020000
20/11/2019 01:39:50	1020000
20/11/2019 01:39:51	1020000
20/11/2019 01:39:52	1020000
20/11/2019 01:39:54	1020000
20/11/2019 01:39:55	1010000
20/11/2019 01:39:56	1020000
20/11/2019 01:39:57	1010000
20/11/2019 01:39:58	1030000
20/11/2019 01:39:59	1020000
20/11/2019 01:40:00	1020000
20/11/2019 01:40:01	1020000
20/11/2019 01:40:03	1030000
20/11/2019 01:40:04	1030000
20/11/2019 01:40:05	1030000
20/11/2019 01:40:06	1030000
20/11/2019 01:40:07	1030000
20/11/2019 01:40:08	1030000
20/11/2019 01:40:09	1030000
20/11/2019 01:40:10	1020000
20/11/2019 01:40:12	1000000
20/11/2019 01:40:13	1000000
20/11/2019 01:40:14	994000
20/11/2019 01:40:15	994000
20/11/2019 01:40:16	984000
20/11/2019 01:40:17	974000
20/11/2019 01:40:18	975000
20/11/2019 01:40:19	972000
20/11/2019 01:40:21	974000
20/11/2019 01:40:22	967000
20/11/2019 01:40:23	963000
20/11/2019 01:40:24	968000
20/11/2019 01:40:25	968000
20/11/2019 01:40:26	962000
20/11/2019 01:40:27	980000
20/11/2019 01:40:28	979000
20/11/2019 01:40:30	981000
20/11/2019 01:40:31	981000
20/11/2019 01:40:32	989000
20/11/2019 01:40:33	974000
20/11/2019 01:40:34	985000
20/11/2019 01:40:35	985000
20/11/2019 01:40:36	984000
20/11/2019 01:40:37	984000
20/11/2019 01:40:39	984000
20/11/2019 01:40:40	991000
20/11/2019 01:40:41	999000
20/11/2019 01:40:42	1010000
20/11/2019 01:40:43	1010000
20/11/2019 01:40:44	1020000
20/11/2019 01:40:45	1020000
20/11/2019 01:40:46	1030000
20/11/2019 01:40:48	1030000
20/11/2019 01:40:49	1040000
20/11/2019 01:40:50	1020000
20/11/2019 01:40:51	1020000
20/11/2019 01:40:52	1000000
20/11/2019 01:40:53	1010000
20/11/2019 01:40:54	1000000
20/11/2019 01:40:55	1010000
20/11/2019 01:40:57	1020000
20/11/2019 01:40:58	1030000
20/11/2019 01:40:59	1040000
20/11/2019 01:41:00	1030000
20/11/2019 01:41:01	1050000
20/11/2019 01:41:02	1050000
20/11/2019 01:41:03	1070000
20/11/2019 01:41:04	1070000
20/11/2019 01:41:05	1060000
20/11/2019 01:41:07	1050000
20/11/2019 01:41:08	1050000
20/11/2019 01:41:09	1060000
20/11/2019 01:41:10	1060000
20/11/2019 01:41:11	1060000
20/11/2019 01:41:12	1080000
20/11/2019 01:41:13	1080000
20/11/2019 01:41:14	1080000
20/11/2019 01:41:16	1080000
20/11/2019 01:41:17	1080000
20/11/2019 01:41:18	1080000
20/11/2019 01:41:19	1090000
20/11/2019 01:41:20	1090000
20/11/2019 01:41:21	1100000
20/11/2019 01:41:22	1110000
20/11/2019 01:41:23	1110000
20/11/2019 01:41:24	1120000
20/11/2019 01:41:25	1130000
20/11/2019 01:41:27	1120000
20/11/2019 01:41:28	1120000
20/11/2019 01:41:29	1120000
20/11/2019 01:41:30	1120000
20/11/2019 01:41:31	1130000
20/11/2019 01:41:32	1140000
20/11/2019 01:41:33	1140000
20/11/2019 01:41:34	1140000
20/11/2019 01:41:36	1150000
20/11/2019 01:41:37	1150000
20/11/2019 01:41:38	1150000
20/11/2019 01:41:39	1160000
20/11/2019 01:41:40	1170000
20/11/2019 01:41:41	1170000
20/11/2019 01:41:42	1160000
20/11/2019 01:41:43	1150000
20/11/2019 01:41:44	1150000
20/11/2019 01:41:46	1150000
20/11/2019 01:41:47	1140000
20/11/2019 01:41:48	1150000
20/11/2019 01:41:49	1140000
20/11/2019 01:41:50	1150000
20/11/2019 01:41:51	1150000
20/11/2019 01:41:52	1150000
20/11/2019 01:41:53	1150000
20/11/2019 01:41:55	1160000
20/11/2019 01:41:56	1170000
20/11/2019 01:41:57	1170000
20/11/2019 01:41:58	1170000
20/11/2019 01:41:59	1170000
20/11/2019 01:42:00	1180000
20/11/2019 01:42:01	1190000
20/11/2019 01:42:02	1190000
20/11/2019 01:42:03	1180000
20/11/2019 01:42:05	1190000
20/11/2019 01:42:06	1190000
20/11/2019 01:42:07	1200000
20/11/2019 01:42:08	1200000
20/11/2019 01:42:09	1220000
20/11/2019 01:42:10	1230000
20/11/2019 01:42:11	1240000
20/11/2019 01:42:12	1240000
20/11/2019 01:42:14	1240000
20/11/2019 01:42:15	1240000
20/11/2019 01:42:16	1240000
20/11/2019 01:42:17	1240000
20/11/2019 01:42:18	1230000
20/11/2019 01:42:19	1240000
20/11/2019 01:42:20	1250000
20/11/2019 01:42:21	1260000
20/11/2019 01:42:23	1260000
20/11/2019 01:42:24	1250000
20/11/2019 01:42:25	1240000
20/11/2019 01:42:26	1240000
20/11/2019 01:42:27	1240000
20/11/2019 01:42:28	1240000
20/11/2019 01:42:29	1250000
20/11/2019 01:42:30	1260000
20/11/2019 01:42:31	1260000
20/11/2019 01:42:33	1250000
20/11/2019 01:42:34	1250000
20/11/2019 01:42:35	1230000
20/11/2019 01:42:36	1230000
20/11/2019 01:42:37	1240000
20/11/2019 01:42:38	1220000
20/11/2019 01:42:39	1220000
20/11/2019 01:42:41	1210000
20/11/2019 01:42:42	1220000
20/11/2019 01:42:43	1200000
20/11/2019 01:42:44	1190000
20/11/2019 01:42:45	1190000
20/11/2019 01:42:46	1190000
20/11/2019 01:42:47	1180000
20/11/2019 01:42:48	1170000
20/11/2019 01:42:50	1170000
20/11/2019 01:42:51	1170000
20/11/2019 01:42:52	1160000
20/11/2019 01:42:53	1170000
20/11/2019 01:42:54	1180000
20/11/2019 01:42:55	1180000
20/11/2019 01:42:56	1180000
20/11/2019 01:42:57	1180000
20/11/2019 01:42:58	1180000
20/11/2019 01:43:00	1180000
20/11/2019 01:43:01	1180000
20/11/2019 01:43:02	1180000
20/11/2019 01:43:03	1160000
20/11/2019 01:43:04	1170000
20/11/2019 01:43:05	1180000
20/11/2019 01:43:06	1180000
20/11/2019 01:43:07	1180000
20/11/2019 01:43:08	1190000
20/11/2019 01:43:09	1200000
20/11/2019 01:43:11	1210000
20/11/2019 01:43:12	1210000
20/11/2019 01:43:13	1210000
20/11/2019 01:43:14	1220000
20/11/2019 01:43:15	1220000
20/11/2019 01:43:16	1220000
20/11/2019 01:43:17	1200000
20/11/2019 01:43:18	1200000
20/11/2019 01:43:20	1200000
20/11/2019 01:43:21	1190000
20/11/2019 01:43:22	1200000
20/11/2019 01:43:23	1200000
20/11/2019 01:43:24	1190000
20/11/2019 01:43:25	1190000
20/11/2019 01:43:26	1190000
20/11/2019 01:43:27	1190000
20/11/2019 01:43:29	1200000
20/11/2019 01:43:30	1210000
20/11/2019 01:43:31	1200000
20/11/2019 01:43:32	1190000
20/11/2019 01:43:33	1200000
20/11/2019 01:43:34	1220000
20/11/2019 01:43:35	1250000
20/11/2019 01:43:36	1260000
20/11/2019 01:43:37	1260000
20/11/2019 01:43:39	1280000
20/11/2019 01:43:40	1300000
20/11/2019 01:43:41	1300000
20/11/2019 01:43:42	1300000
20/11/2019 01:43:43	1300000
20/11/2019 01:43:44	1300000
20/11/2019 01:43:45	1290000
20/11/2019 01:43:46	1280000
20/11/2019 01:43:47	1280000
20/11/2019 01:43:49	1270000
20/11/2019 01:43:50	1280000
20/11/2019 01:43:51	1280000
20/11/2019 01:43:52	1280000
20/11/2019 01:43:53	1280000
20/11/2019 01:43:54	1280000
20/11/2019 01:43:55	1270000
20/11/2019 01:43:56	1280000
20/11/2019 01:43:58	1260000
20/11/2019 01:43:59	1260000
20/11/2019 01:44:00	1270000
20/11/2019 01:44:01	1270000
20/11/2019 01:44:02	1270000
20/11/2019 01:44:03	1270000
20/11/2019 01:44:05	1290000
20/11/2019 01:44:06	1290000
20/11/2019 01:44:07	1300000
20/11/2019 01:44:08	1300000
20/11/2019 01:44:09	1300000
20/11/2019 01:44:10	1290000
20/11/2019 01:44:11	1290000
20/11/2019 01:44:12	1270000
20/11/2019 01:44:13	1280000
20/11/2019 01:44:15	1270000
20/11/2019 01:44:16	1270000
20/11/2019 01:44:17	1260000
20/11/2019 01:44:18	1260000
20/11/2019 01:44:19	1240000
20/11/2019 01:44:20	1230000
20/11/2019 01:44:21	1230000
20/11/2019 01:44:22	1210000
20/11/2019 01:44:24	1210000
20/11/2019 01:44:25	1200000
20/11/2019 01:44:26	1190000
20/11/2019 01:44:27	1190000
20/11/2019 01:44:28	1190000
20/11/2019 01:44:29	1200000
20/11/2019 01:44:30	1210000
20/11/2019 01:44:31	1200000
20/11/2019 01:44:33	1220000
20/11/2019 01:44:34	1210000
20/11/2019 01:44:35	1200000
20/11/2019 01:44:36	1190000
20/11/2019 01:44:37	1190000
20/11/2019 01:44:38	1180000
20/11/2019 01:44:39	1170000
20/11/2019 01:44:40	1170000
20/11/2019 01:44:41	1170000
20/11/2019 01:44:43	1160000
20/11/2019 01:44:44	1150000
20/11/2019 01:44:45	1140000
20/11/2019 01:44:46	1130000
20/11/2019 01:44:47	1130000
20/11/2019 01:44:48	1120000
20/11/2019 01:44:49	1140000
20/11/2019 01:44:50	1160000
20/11/2019 01:44:51	1160000
20/11/2019 01:44:53	1150000
20/11/2019 01:44:54	1140000
20/11/2019 01:44:55	1140000
20/11/2019 01:44:56	1130000
20/11/2019 01:44:57	1130000
20/11/2019 01:44:58	1120000
20/11/2019 01:44:59	1120000
20/11/2019 01:45:00	1110000
20/11/2019 01:45:02	1110000
20/11/2019 01:45:03	1120000
20/11/2019 01:45:04	1120000
20/11/2019 01:45:05	1120000
20/11/2019 01:45:06	1120000
20/11/2019 01:45:07	1120000
20/11/2019 01:45:08	1130000
20/11/2019 01:45:09	1120000
20/11/2019 01:45:11	1120000
20/11/2019 01:45:12	1110000
20/11/2019 01:45:13	1110000
20/11/2019 01:45:14	1110000
20/11/2019 01:45:15	1120000
20/11/2019 01:45:16	1110000
20/11/2019 01:45:17	1120000
20/11/2019 01:45:18	1120000
20/11/2019 01:45:20	1120000
20/11/2019 01:45:21	1110000
20/11/2019 01:45:22	1120000
20/11/2019 01:45:23	1110000
20/11/2019 01:45:24	1120000
20/11/2019 01:45:25	1120000
20/11/2019 01:45:26	1120000
20/11/2019 01:45:27	1120000
20/11/2019 01:45:28	1120000
20/11/2019 01:45:30	1130000
20/11/2019 01:45:31	1120000
20/11/2019 01:45:32	1110000
20/11/2019 01:45:33	1100000
20/11/2019 01:45:34	1100000
20/11/2019 01:45:35	1110000
20/11/2019 01:45:36	1110000
20/11/2019 01:45:37	1100000
20/11/2019 01:45:39	1100000
20/11/2019 01:45:40	1100000
20/11/2019 01:45:41	1090000
20/11/2019 01:45:42	1080000
20/11/2019 01:45:43	1080000
20/11/2019 01:45:44	1080000
20/11/2019 01:45:45	1080000
20/11/2019 01:45:46	1080000
20/11/2019 01:45:48	1090000
20/11/2019 01:45:49	1090000
20/11/2019 01:45:50	1090000
20/11/2019 01:45:51	1090000
20/11/2019 01:45:52	1070000
20/11/2019 01:45:53	1080000
20/11/2019 01:45:54	1080000
20/11/2019 01:45:55	1090000
20/11/2019 01:45:57	1080000
20/11/2019 01:45:58	1080000
20/11/2019 01:45:59	1080000
20/11/2019 01:46:00	1090000
20/11/2019 01:46:01	1090000
20/11/2019 01:46:02	1110000
20/11/2019 01:46:03	1100000
20/11/2019 01:46:04	1100000
20/11/2019 01:46:05	1110000
20/11/2019 01:46:07	1110000
20/11/2019 01:46:08	1110000
20/11/2019 01:46:09	1110000
20/11/2019 01:46:10	1110000
20/11/2019 01:46:11	1120000
20/11/2019 01:46:12	1120000
20/11/2019 01:46:13	1130000
20/11/2019 01:46:14	1120000
20/11/2019 01:46:16	1120000
20/11/2019 01:46:17	1110000
20/11/2019 01:46:18	1110000
20/11/2019 01:46:19	1100000
20/11/2019 01:46:20	1090000
20/11/2019 01:46:21	1100000
20/11/2019 01:46:22	1120000
20/11/2019 01:46:23	1120000
20/11/2019 01:46:24	1130000
20/11/2019 01:46:26	1120000
20/11/2019 01:46:27	1120000
20/11/2019 01:46:28	1130000
20/11/2019 01:46:29	1120000
20/11/2019 01:46:30	1110000
20/11/2019 01:46:31	1140000
20/11/2019 01:46:32	1140000
20/11/2019 01:46:34	1130000
20/11/2019 01:46:35	1130000
20/11/2019 01:46:36	1140000
20/11/2019 01:46:37	1130000
20/11/2019 01:46:38	1130000
20/11/2019 01:46:39	1130000
20/11/2019 01:46:40	1140000
20/11/2019 01:46:41	1130000
20/11/2019 01:46:43	1140000
20/11/2019 01:46:44	1140000
20/11/2019 01:46:45	1140000
20/11/2019 01:46:46	1140000
20/11/2019 01:46:47	1140000
20/11/2019 01:46:48	1140000
20/11/2019 01:46:49	1140000
20/11/2019 01:46:50	1140000
20/11/2019 01:46:51	1140000
20/11/2019 01:46:53	1140000
20/11/2019 01:46:54	1150000
20/11/2019 01:46:55	1150000
20/11/2019 01:46:56	1120000
20/11/2019 01:46:57	1110000
20/11/2019 01:46:58	1110000
20/11/2019 01:46:59	1100000
20/11/2019 01:47:00	1100000
20/11/2019 01:47:02	1080000
20/11/2019 01:47:03	1070000
20/11/2019 01:47:04	1070000
20/11/2019 01:47:05	1070000
20/11/2019 01:47:06	1090000
20/11/2019 01:47:07	1090000
20/11/2019 01:47:08	1090000
20/11/2019 01:47:09	1090000
20/11/2019 01:47:10	1090000
20/11/2019 01:47:12	1070000
20/11/2019 01:47:13	1080000
20/11/2019 01:47:14	1070000
20/11/2019 01:47:15	1070000
20/11/2019 01:47:16	1060000
20/11/2019 01:47:17	1060000
20/11/2019 01:47:18	1040000
20/11/2019 01:47:19	1040000
20/11/2019 01:47:21	1040000
20/11/2019 01:47:22	1030000
20/11/2019 01:47:23	1020000
20/11/2019 01:47:24	1020000
20/11/2019 01:47:25	999000
20/11/2019 01:47:26	982000
20/11/2019 01:47:27	977000
20/11/2019 01:47:28	972000
20/11/2019 01:47:30	973000
20/11/2019 01:47:31	976000
20/11/2019 01:47:32	998000
20/11/2019 01:47:33	1000000
20/11/2019 01:47:34	1010000
20/11/2019 01:47:35	1000000
20/11/2019 01:47:36	1010000
20/11/2019 01:47:37	1010000
20/11/2019 01:47:38	1010000
20/11/2019 01:47:40	1020000
20/11/2019 01:47:41	1030000
20/11/2019 01:47:42	1050000
20/11/2019 01:47:43	1050000
20/11/2019 01:47:44	1060000
20/11/2019 01:47:45	1050000
20/11/2019 01:47:46	1060000
20/11/2019 01:47:47	1070000
20/11/2019 01:47:49	1060000
20/11/2019 01:47:50	1060000
20/11/2019 01:47:51	1040000
20/11/2019 01:47:52	1040000
20/11/2019 01:47:53	1040000
20/11/2019 01:47:54	1030000
20/11/2019 01:47:55	1050000
20/11/2019 01:47:57	1050000
20/11/2019 01:47:58	1060000
20/11/2019 01:47:59	1060000
20/11/2019 01:48:00	1060000
20/11/2019 01:48:01	1060000
20/11/2019 01:48:02	1070000
20/11/2019 01:48:03	1070000
20/11/2019 01:48:04	1070000
20/11/2019 01:48:06	1070000
20/11/2019 01:48:07	1070000
20/11/2019 01:48:08	1080000
20/11/2019 01:48:09	1080000
20/11/2019 01:48:10	1070000
20/11/2019 01:48:11	1060000
20/11/2019 01:48:12	1040000
20/11/2019 01:48:13	1050000
20/11/2019 01:48:14	1050000
20/11/2019 01:48:16	1060000
20/11/2019 01:48:17	1060000
20/11/2019 01:48:18	1060000
20/11/2019 01:48:19	1060000
20/11/2019 01:48:20	1060000
20/11/2019 01:48:21	1070000
20/11/2019 01:48:22	1060000
20/11/2019 01:48:23	1050000
20/11/2019 01:48:25	1040000
20/11/2019 01:48:26	1050000
20/11/2019 01:48:27	1050000
20/11/2019 01:48:28	1040000
20/11/2019 01:48:29	1040000
20/11/2019 01:48:30	1040000
20/11/2019 01:48:31	1040000
20/11/2019 01:48:32	1040000
20/11/2019 01:48:33	1050000
20/11/2019 01:48:35	1050000
20/11/2019 01:48:36	1040000
20/11/2019 01:48:37	1040000
20/11/2019 01:48:38	1030000
20/11/2019 01:48:39	1040000
20/11/2019 01:48:40	1050000
20/11/2019 01:48:41	1050000
20/11/2019 01:48:42	1060000
20/11/2019 01:48:44	1060000
20/11/2019 01:48:45	1060000
20/11/2019 01:48:46	1050000
20/11/2019 01:48:47	1040000
20/11/2019 01:48:48	1050000
20/11/2019 01:48:49	1060000
20/11/2019 01:48:50	1060000
20/11/2019 01:48:51	1050000
20/11/2019 01:48:52	1040000
20/11/2019 01:48:54	1030000
20/11/2019 01:48:55	1040000
20/11/2019 01:48:56	1030000
20/11/2019 01:48:57	1030000
20/11/2019 01:48:58	1040000
20/11/2019 01:48:59	1040000
20/11/2019 01:49:00	1050000
20/11/2019 01:49:01	1050000
20/11/2019 01:49:03	1060000
20/11/2019 01:49:04	1060000
20/11/2019 01:49:05	1060000
20/11/2019 01:49:06	1070000
20/11/2019 01:49:07	1060000
20/11/2019 01:49:08	1070000
20/11/2019 01:49:09	1070000
20/11/2019 01:49:10	1060000
20/11/2019 01:49:11	1070000
20/11/2019 01:49:13	1060000
20/11/2019 01:49:14	1060000
20/11/2019 01:49:15	1050000
20/11/2019 01:49:16	1040000
20/11/2019 01:49:17	1040000
20/11/2019 01:49:18	1040000
20/11/2019 01:49:19	1050000
20/11/2019 01:49:20	1050000
20/11/2019 01:49:21	1040000
20/11/2019 01:49:23	1040000
20/11/2019 01:49:24	1030000
20/11/2019 01:49:25	1020000
20/11/2019 01:49:26	1020000
20/11/2019 01:49:27	1010000
20/11/2019 01:49:28	1010000
20/11/2019 01:49:29	1020000
20/11/2019 01:49:30	1020000
20/11/2019 01:49:31	1020000
20/11/2019 01:49:33	1010000
20/11/2019 01:49:34	1000000
20/11/2019 01:49:35	1010000
20/11/2019 01:49:36	1010000
20/11/2019 01:49:37	997000
20/11/2019 01:49:38	1000000
20/11/2019 01:49:39	1000000
20/11/2019 01:49:40	1000000
20/11/2019 01:49:42	1010000
20/11/2019 01:49:43	1000000
20/11/2019 01:49:44	986000
20/11/2019 01:49:45	986000
20/11/2019 01:49:46	981000
20/11/2019 01:49:47	986000
20/11/2019 01:49:48	980000
20/11/2019 01:49:49	978000
20/11/2019 01:49:50	980000
20/11/2019 01:49:52	990000
20/11/2019 01:49:53	953000
20/11/2019 01:49:54	962000
20/11/2019 01:49:55	962000
20/11/2019 01:49:56	962000
20/11/2019 01:49:57	950000
20/11/2019 01:49:58	967000
20/11/2019 01:49:59	977000
20/11/2019 01:50:01	981000
20/11/2019 01:50:02	976000
20/11/2019 01:50:03	976000
20/11/2019 01:50:04	989000
20/11/2019 01:50:05	1010000
20/11/2019 01:50:06	1010000
20/11/2019 01:50:07	1040000
20/11/2019 01:50:08	1030000
20/11/2019 01:50:09	1020000
20/11/2019 01:50:11	1010000
20/11/2019 01:50:12	1010000
20/11/2019 01:50:13	995000
20/11/2019 01:50:14	997000
20/11/2019 01:50:15	998000
20/11/2019 01:50:16	1010000
20/11/2019 01:50:17	1010000
20/11/2019 01:50:18	1000000
20/11/2019 01:50:20	1020000
20/11/2019 01:50:21	1030000
20/11/2019 01:50:22	1020000
20/11/2019 01:50:23	1030000
20/11/2019 01:50:24	1030000
20/11/2019 01:50:25	1030000
20/11/2019 01:50:26	1030000
20/11/2019 01:50:27	1020000
20/11/2019 01:50:28	1020000
20/11/2019 01:50:30	1030000
20/11/2019 01:50:31	1040000
20/11/2019 01:50:32	1040000
20/11/2019 01:50:33	1060000
20/11/2019 01:50:34	1050000
20/11/2019 01:50:35	1050000
20/11/2019 01:50:36	1060000
20/11/2019 01:50:37	1070000
20/11/2019 01:50:39	1070000
20/11/2019 01:50:40	1080000
20/11/2019 01:50:41	1090000
20/11/2019 01:50:42	1090000
20/11/2019 01:50:43	1100000
20/11/2019 01:50:44	1100000
20/11/2019 01:50:45	1100000
20/11/2019 01:50:46	1100000
20/11/2019 01:50:47	1120000
20/11/2019 01:50:49	1110000
20/11/2019 01:50:50	1120000
20/11/2019 01:50:51	1110000
20/11/2019 01:50:52	1110000
20/11/2019 01:50:53	1090000
20/11/2019 01:50:54	1090000
20/11/2019 01:50:55	1100000
20/11/2019 01:50:56	1100000
20/11/2019 01:50:57	1100000
20/11/2019 01:50:59	1090000
20/11/2019 01:51:00	1100000
20/11/2019 01:51:01	1090000
20/11/2019 01:51:02	1090000
20/11/2019 01:51:03	1070000
20/11/2019 01:51:04	1080000
20/11/2019 01:51:05	1090000
20/11/2019 01:51:06	1090000
20/11/2019 01:51:07	1100000
20/11/2019 01:51:09	1100000
20/11/2019 01:51:10	1100000
20/11/2019 01:51:11	1110000
20/11/2019 01:51:12	1110000
20/11/2019 01:51:13	1110000
20/11/2019 01:51:14	1100000
20/11/2019 01:51:15	1090000
20/11/2019 01:51:16	1080000
20/11/2019 01:51:18	1090000
20/11/2019 01:51:19	1090000
20/11/2019 01:51:20	1090000
20/11/2019 01:51:21	1100000
20/11/2019 01:51:22	1110000
20/11/2019 01:51:23	1110000
20/11/2019 01:51:24	1100000
20/11/2019 01:51:25	1100000
20/11/2019 01:51:27	1100000
20/11/2019 01:51:28	1110000
20/11/2019 01:51:29	1100000
20/11/2019 01:51:30	1090000
20/11/2019 01:51:31	1100000
20/11/2019 01:51:32	1100000
20/11/2019 01:51:33	1120000
20/11/2019 01:51:34	1120000
20/11/2019 01:51:35	1120000
20/11/2019 01:51:37	1150000
20/11/2019 01:51:38	1140000
20/11/2019 01:51:39	1160000
20/11/2019 01:51:40	1160000
20/11/2019 01:51:41	1180000
20/11/2019 01:51:42	1160000
20/11/2019 01:51:43	1180000
20/11/2019 01:51:44	1180000
20/11/2019 01:51:46	1180000
20/11/2019 01:51:47	1200000
20/11/2019 01:51:48	1200000
20/11/2019 01:51:49	1200000
20/11/2019 01:51:50	1200000
20/11/2019 01:51:51	1200000
20/11/2019 01:51:52	1200000
20/11/2019 01:51:53	1210000
20/11/2019 01:51:54	1200000
20/11/2019 01:51:56	1210000
20/11/2019 01:51:57	1210000
20/11/2019 01:51:58	1210000
20/11/2019 01:51:59	1220000
20/11/2019 01:52:00	1200000
20/11/2019 01:52:01	1190000
20/11/2019 01:52:02	1200000
20/11/2019 01:52:03	1190000
20/11/2019 01:52:05	1180000
20/11/2019 01:52:06	1180000
20/11/2019 01:52:07	1180000
20/11/2019 01:52:08	1210000
20/11/2019 01:52:09	1190000
20/11/2019 01:52:10	1190000
20/11/2019 01:52:11	1190000
20/11/2019 01:52:12	1200000
20/11/2019 01:52:13	1200000
20/11/2019 01:52:15	1210000
20/11/2019 01:52:16	1210000
20/11/2019 01:52:17	1220000
20/11/2019 01:52:18	1230000
20/11/2019 01:52:19	1220000
20/11/2019 01:52:20	1220000
20/11/2019 01:52:21	1220000
20/11/2019 01:52:22	1250000
20/11/2019 01:52:23	1240000
20/11/2019 01:52:25	1240000
20/11/2019 01:52:26	1230000
20/11/2019 01:52:27	1230000
20/11/2019 01:52:28	1230000
20/11/2019 01:52:29	1230000
20/11/2019 01:52:30	1230000
20/11/2019 01:52:31	1230000
20/11/2019 01:52:32	1220000
20/11/2019 01:52:34	1230000
20/11/2019 01:52:35	1230000
20/11/2019 01:52:36	1220000
20/11/2019 01:52:37	1230000
20/11/2019 01:52:38	1230000
20/11/2019 01:52:39	1240000
20/11/2019 01:52:40	1240000
20/11/2019 01:52:41	1230000
20/11/2019 01:52:42	1230000
20/11/2019 01:52:44	1230000
20/11/2019 01:52:45	1230000
20/11/2019 01:52:46	1230000
20/11/2019 01:52:47	1240000
20/11/2019 01:52:48	1250000
20/11/2019 01:52:49	1260000
20/11/2019 01:52:50	1270000
20/11/2019 01:52:51	1260000
20/11/2019 01:52:53	1260000
20/11/2019 01:52:54	1260000
20/11/2019 01:52:55	1260000
20/11/2019 01:52:56	1260000
20/11/2019 01:52:57	1270000
20/11/2019 01:52:58	1270000
20/11/2019 01:52:59	1270000
20/11/2019 01:53:00	1270000
20/11/2019 01:53:01	1270000
20/11/2019 01:53:03	1270000
20/11/2019 01:53:04	1260000
20/11/2019 01:53:05	1270000
20/11/2019 01:53:06	1280000
20/11/2019 01:53:07	1290000
20/11/2019 01:53:08	1300000
20/11/2019 01:53:09	1300000
20/11/2019 01:53:10	1310000
20/11/2019 01:53:11	1320000
20/11/2019 01:53:13	1320000
20/11/2019 01:53:14	1310000
20/11/2019 01:53:15	1310000
20/11/2019 01:53:16	1310000
20/11/2019 01:53:17	1310000
20/11/2019 01:53:18	1320000
20/11/2019 01:53:19	1310000
20/11/2019 01:53:20	1300000
20/11/2019 01:53:21	1300000
20/11/2019 01:53:23	1310000
20/11/2019 01:53:24	1320000
20/11/2019 01:53:25	1300000
20/11/2019 01:53:26	1280000
20/11/2019 01:53:27	1280000
20/11/2019 01:53:28	1250000
20/11/2019 01:53:29	1270000
20/11/2019 01:53:30	1280000
20/11/2019 01:53:31	1280000
20/11/2019 01:53:33	1270000
20/11/2019 01:53:34	1270000
20/11/2019 01:53:35	1270000
20/11/2019 01:53:36	1270000
20/11/2019 01:53:37	1250000
20/11/2019 01:53:38	1250000
20/11/2019 01:53:39	1260000
20/11/2019 01:53:40	1250000
20/11/2019 01:53:41	1260000
20/11/2019 01:53:43	1270000
20/11/2019 01:53:44	1280000
20/11/2019 01:53:45	1270000
20/11/2019 01:53:46	1270000
20/11/2019 01:53:47	1270000
20/11/2019 01:53:48	1280000
20/11/2019 01:53:49	1290000
20/11/2019 01:53:50	1280000
20/11/2019 01:53:52	1280000
20/11/2019 01:53:53	1270000
20/11/2019 01:53:54	1260000
20/11/2019 01:53:55	1270000
20/11/2019 01:53:56	1290000
20/11/2019 01:53:57	1290000
20/11/2019 01:53:58	1280000
20/11/2019 01:53:59	1270000
20/11/2019 01:54:00	1260000
20/11/2019 01:54:02	1250000
20/11/2019 01:54:03	1240000
20/11/2019 01:54:04	1240000
20/11/2019 01:54:05	1250000
20/11/2019 01:54:06	1260000
20/11/2019 01:54:07	1270000
20/11/2019 01:54:08	1250000
20/11/2019 01:54:09	1260000
20/11/2019 01:54:11	1250000
20/11/2019 01:54:12	1250000
20/11/2019 01:54:13	1270000
20/11/2019 01:54:14	1260000
20/11/2019 01:54:15	1260000
20/11/2019 01:54:16	1260000
20/11/2019 01:54:17	1260000
20/11/2019 01:54:18	1260000
20/11/2019 01:54:19	1290000
20/11/2019 01:54:20	1310000
20/11/2019 01:54:22	1310000
20/11/2019 01:54:23	1310000
20/11/2019 01:54:24	1310000
20/11/2019 01:54:25	1320000
20/11/2019 01:54:26	1320000
20/11/2019 01:54:27	1320000
20/11/2019 01:54:28	1300000
20/11/2019 01:54:29	1300000
20/11/2019 01:54:30	1300000
20/11/2019 01:54:32	1320000
20/11/2019 01:54:33	1320000
20/11/2019 01:54:34	1330000
20/11/2019 01:54:35	1330000
20/11/2019 01:54:36	1340000
20/11/2019 01:54:37	1330000
20/11/2019 01:54:38	1320000
20/11/2019 01:54:39	1320000
20/11/2019 01:54:40	1330000
20/11/2019 01:54:42	1330000
20/11/2019 01:54:43	1320000
20/11/2019 01:54:44	1320000
20/11/2019 01:54:45	1310000
20/11/2019 01:54:46	1310000
20/11/2019 01:54:47	1310000
20/11/2019 01:54:48	1310000
20/11/2019 01:54:49	1310000
20/11/2019 01:54:51	1310000
20/11/2019 01:54:52	1300000
20/11/2019 01:54:53	1300000
20/11/2019 01:54:54	1300000
20/11/2019 01:54:55	1290000
20/11/2019 01:54:56	1280000
20/11/2019 01:54:57	1250000
20/11/2019 01:54:58	1250000
20/11/2019 01:55:00	1240000
20/11/2019 01:55:01	1240000
20/11/2019 01:55:02	1220000
20/11/2019 01:55:03	1220000
20/11/2019 01:55:04	1220000
20/11/2019 01:55:05	1230000
20/11/2019 01:55:06	1230000
20/11/2019 01:55:07	1210000
20/11/2019 01:55:08	1230000
20/11/2019 01:55:10	1240000
20/11/2019 01:55:11	1250000
20/11/2019 01:55:12	1250000
20/11/2019 01:55:13	1250000
20/11/2019 01:55:14	1260000
20/11/2019 01:55:15	1250000
20/11/2019 01:55:16	1260000
20/11/2019 01:55:17	1260000
20/11/2019 01:55:18	1250000
20/11/2019 01:55:20	1250000
20/11/2019 01:55:21	1240000
20/11/2019 01:55:22	1240000
20/11/2019 01:55:23	1230000
20/11/2019 01:55:24	1260000
20/11/2019 01:55:25	1260000
20/11/2019 01:55:26	1270000
20/11/2019 01:55:27	1300000
20/11/2019 01:55:28	1280000
20/11/2019 01:55:30	1280000
20/11/2019 01:55:31	1270000
20/11/2019 01:55:32	1270000
20/11/2019 01:55:33	1270000
20/11/2019 01:55:34	1270000
20/11/2019 01:55:35	1280000
20/11/2019 01:55:36	1270000
20/11/2019 01:55:37	1260000
20/11/2019 01:55:38	1250000
20/11/2019 01:55:40	1260000
20/11/2019 01:55:41	1250000
20/11/2019 01:55:42	1250000
20/11/2019 01:55:43	1220000
20/11/2019 01:55:44	1220000
20/11/2019 01:55:45	1220000
20/11/2019 01:55:46	1210000
20/11/2019 01:55:47	1220000
20/11/2019 01:55:48	1220000
20/11/2019 01:55:50	1220000
20/11/2019 01:55:51	1220000
20/11/2019 01:55:52	1220000
20/11/2019 01:55:53	1220000
20/11/2019 01:55:54	1220000
20/11/2019 01:55:55	1220000
20/11/2019 01:55:56	1230000
20/11/2019 01:55:57	1220000
20/11/2019 01:55:58	1210000
20/11/2019 01:56:00	1200000
20/11/2019 01:56:01	1200000
20/11/2019 01:56:02	1210000
20/11/2019 01:56:03	1210000
20/11/2019 01:56:04	1230000
20/11/2019 01:56:05	1250000
20/11/2019 01:56:06	1260000
20/11/2019 01:56:07	1250000
20/11/2019 01:56:09	1250000
20/11/2019 01:56:10	1230000
20/11/2019 01:56:11	1210000
20/11/2019 01:56:12	1210000
20/11/2019 01:56:13	1220000
20/11/2019 01:56:14	1210000
20/11/2019 01:56:15	1210000
20/11/2019 01:56:16	1210000
20/11/2019 01:56:17	1200000
20/11/2019 01:56:19	1200000
20/11/2019 01:56:20	1210000
20/11/2019 01:56:21	1210000
20/11/2019 01:56:22	1220000
20/11/2019 01:56:23	1220000
20/11/2019 01:56:24	1220000
20/11/2019 01:56:25	1210000
20/11/2019 01:56:26	1200000
20/11/2019 01:56:27	1220000
20/11/2019 01:56:29	1220000
20/11/2019 01:56:30	1240000
20/11/2019 01:56:31	1250000
20/11/2019 01:56:32	1240000
20/11/2019 01:56:33	1240000
20/11/2019 01:56:34	1260000
20/11/2019 01:56:35	1280000
20/11/2019 01:56:36	1280000
20/11/2019 01:56:37	1280000
20/11/2019 01:56:39	1270000
20/11/2019 01:56:40	1260000
20/11/2019 01:56:41	1260000
20/11/2019 01:56:42	1250000
20/11/2019 01:56:43	1240000
20/11/2019 01:56:44	1240000
20/11/2019 01:56:45	1240000
20/11/2019 01:56:46	1230000
20/11/2019 01:56:48	1230000
20/11/2019 01:56:49	1230000
20/11/2019 01:56:50	1230000
20/11/2019 01:56:51	1230000
20/11/2019 01:56:52	1230000
20/11/2019 01:56:53	1240000
20/11/2019 01:56:54	1250000
20/11/2019 01:56:55	1260000
20/11/2019 01:56:56	1260000
20/11/2019 01:56:58	1280000
20/11/2019 01:56:59	1280000
20/11/2019 01:57:00	1270000
20/11/2019 01:57:01	1250000
20/11/2019 01:57:02	1230000
20/11/2019 01:57:03	1220000
20/11/2019 01:57:04	1220000
20/11/2019 01:57:05	1210000
20/11/2019 01:57:07	1210000
20/11/2019 01:57:08	1220000
20/11/2019 01:57:09	1210000
20/11/2019 01:57:10	1200000
20/11/2019 01:57:11	1200000
20/11/2019 01:57:12	1210000
20/11/2019 01:57:13	1220000
20/11/2019 01:57:14	1230000
20/11/2019 01:57:15	1240000
20/11/2019 01:57:17	1230000
20/11/2019 01:57:18	1240000
20/11/2019 01:57:19	1240000
20/11/2019 01:57:20	1240000
20/11/2019 01:57:21	1240000
20/11/2019 01:57:22	1260000
20/11/2019 01:57:23	1260000
20/11/2019 01:57:24	1270000
20/11/2019 01:57:25	1270000
20/11/2019 01:57:27	1270000
20/11/2019 01:57:28	1260000
20/11/2019 01:57:29	1280000
20/11/2019 01:57:30	1300000
20/11/2019 01:57:31	1300000
20/11/2019 01:57:32	1290000
20/11/2019 01:57:33	1290000
20/11/2019 01:57:34	1290000
20/11/2019 01:57:35	1290000
20/11/2019 01:57:37	1300000
20/11/2019 01:57:38	1290000
20/11/2019 01:57:39	1290000
20/11/2019 01:57:40	1270000
20/11/2019 01:57:41	1240000
20/11/2019 01:57:42	1240000
20/11/2019 01:57:43	1230000
20/11/2019 01:57:44	1230000
20/11/2019 01:57:46	1210000
20/11/2019 01:57:47	1210000
20/11/2019 01:57:48	1210000
20/11/2019 01:57:49	1210000
20/11/2019 01:57:50	1200000
20/11/2019 01:57:51	1190000
20/11/2019 01:57:52	1190000
20/11/2019 01:57:53	1190000
20/11/2019 01:57:55	1190000
20/11/2019 01:57:56	1180000
20/11/2019 01:57:57	1180000
20/11/2019 01:57:58	1180000
20/11/2019 01:57:59	1180000
20/11/2019 01:58:00	1170000
20/11/2019 01:58:01	1170000
20/11/2019 01:58:02	1170000
20/11/2019 01:58:03	1180000
20/11/2019 01:58:05	1170000
20/11/2019 01:58:06	1170000
20/11/2019 01:58:07	1170000
20/11/2019 01:58:08	1170000
20/11/2019 01:58:09	1180000
20/11/2019 01:58:10	1180000
20/11/2019 01:58:11	1180000
20/11/2019 01:58:12	1170000
20/11/2019 01:58:14	1170000
20/11/2019 01:58:15	1170000
20/11/2019 01:58:16	1180000
20/11/2019 01:58:17	1170000
20/11/2019 01:58:18	1170000
20/11/2019 01:58:19	1180000
20/11/2019 01:58:20	1170000
20/11/2019 01:58:21	1190000
20/11/2019 01:58:23	1180000
20/11/2019 01:58:24	1180000
20/11/2019 01:58:25	1180000
20/11/2019 01:58:26	1170000
20/11/2019 01:58:27	1170000
20/11/2019 01:58:28	1170000
20/11/2019 01:58:29	1160000
20/11/2019 01:58:30	1150000
20/11/2019 01:58:31	1140000
20/11/2019 01:58:33	1120000
20/11/2019 01:58:34	1120000
20/11/2019 01:58:35	1110000
20/11/2019 01:58:36	1120000
20/11/2019 01:58:37	1100000
20/11/2019 01:58:38	1100000
20/11/2019 01:58:39	1100000
20/11/2019 01:58:40	1110000
20/11/2019 01:58:41	1110000
20/11/2019 01:58:43	1110000
20/11/2019 01:58:44	1120000
20/11/2019 01:58:45	1110000
20/11/2019 01:58:46	1120000
20/11/2019 01:58:47	1110000
20/11/2019 01:58:48	1080000
20/11/2019 01:58:49	1080000
20/11/2019 01:58:50	1100000
20/11/2019 01:58:52	1100000
20/11/2019 01:58:53	1100000
20/11/2019 01:58:54	1090000
20/11/2019 01:58:55	1090000
20/11/2019 01:58:56	1090000
20/11/2019 01:58:57	1090000
20/11/2019 01:58:58	1080000
20/11/2019 01:58:59	1080000
20/11/2019 01:59:01	1070000
20/11/2019 01:59:02	1070000
20/11/2019 01:59:03	1070000
20/11/2019 01:59:04	1070000
20/11/2019 01:59:05	1070000
20/11/2019 01:59:06	1080000
20/11/2019 01:59:07	1090000
20/11/2019 01:59:08	1080000
20/11/2019 01:59:09	1080000
20/11/2019 01:59:11	1070000
20/11/2019 01:59:12	1080000
20/11/2019 01:59:13	1070000
20/11/2019 01:59:14	1080000
20/11/2019 01:59:15	1070000
20/11/2019 01:59:16	1070000
20/11/2019 01:59:17	1070000
20/11/2019 01:59:19	1080000
20/11/2019 01:59:20	1080000
20/11/2019 01:59:21	1080000
20/11/2019 01:59:22	1080000
20/11/2019 01:59:23	1080000
20/11/2019 01:59:24	1090000
20/11/2019 01:59:25	1090000
20/11/2019 01:59:26	1060000
20/11/2019 01:59:28	1060000
20/11/2019 01:59:29	1060000
20/11/2019 01:59:30	1070000
20/11/2019 01:59:31	1080000
20/11/2019 01:59:32	1090000
20/11/2019 01:59:33	1090000
20/11/2019 01:59:34	1100000
20/11/2019 01:59:35	1120000
20/11/2019 01:59:36	1120000
20/11/2019 01:59:38	1130000
20/11/2019 01:59:39	1130000
20/11/2019 01:59:40	1130000
20/11/2019 01:59:41	1130000
20/11/2019 01:59:42	1120000
20/11/2019 01:59:43	1130000
20/11/2019 01:59:44	1120000
20/11/2019 01:59:45	1120000
20/11/2019 01:59:46	1120000
20/11/2019 01:59:48	1130000
20/11/2019 01:59:49	1100000
20/11/2019 01:59:50	1070000
20/11/2019 01:59:51	1050000
20/11/2019 01:59:52	1030000
20/11/2019 01:59:53	1040000
20/11/2019 01:59:54	1030000
20/11/2019 01:59:55	1010000
20/11/2019 01:59:57	996000
20/11/2019 01:59:58	1000000
20/11/2019 01:59:59	1030000
20/11/2019 02:00:00	1030000
20/11/2019 02:00:01	1030000
20/11/2019 02:00:02	1040000
20/11/2019 02:00:03	1040000
20/11/2019 02:00:04	1040000
20/11/2019 02:00:05	1040000
20/11/2019 02:00:07	1040000
20/11/2019 02:00:08	1040000
20/11/2019 02:00:09	1060000
20/11/2019 02:00:10	1050000
20/11/2019 02:00:11	1040000
20/11/2019 02:00:12	1040000
20/11/2019 02:00:13	1040000
20/11/2019 02:00:14	1030000
20/11/2019 02:00:15	1020000
20/11/2019 02:00:17	1020000
20/11/2019 02:00:18	1010000
20/11/2019 02:00:19	1010000
20/11/2019 02:00:20	1000000
20/11/2019 02:00:21	996000
20/11/2019 02:00:22	993000
20/11/2019 02:00:23	1010000
20/11/2019 02:00:24	1010000
20/11/2019 02:00:25	1010000
20/11/2019 02:00:27	1010000
20/11/2019 02:00:28	1010000
20/11/2019 02:00:29	1020000
20/11/2019 02:00:30	1020000
20/11/2019 02:00:31	1020000
20/11/2019 02:00:32	1020000
20/11/2019 02:00:33	1010000
20/11/2019 02:00:34	1010000
20/11/2019 02:00:36	989000
20/11/2019 02:00:37	979000
20/11/2019 02:00:38	980000
20/11/2019 02:00:39	973000
20/11/2019 02:00:40	972000
20/11/2019 02:00:41	970000
20/11/2019 02:00:42	970000
20/11/2019 02:00:43	953000
20/11/2019 02:00:44	963000
20/11/2019 02:00:46	962000
20/11/2019 02:00:47	954000
20/11/2019 02:00:48	955000
20/11/2019 02:00:49	958000
20/11/2019 02:00:50	941000
20/11/2019 02:00:51	921000
20/11/2019 02:00:52	927000
20/11/2019 02:00:53	929000
20/11/2019 02:00:54	939000
20/11/2019 02:00:56	950000
20/11/2019 02:00:57	946000
20/11/2019 02:00:58	935000
20/11/2019 02:00:59	944000
20/11/2019 02:01:00	945000
20/11/2019 02:01:01	947000
20/11/2019 02:01:02	947000
20/11/2019 02:01:03	940000
20/11/2019 02:01:04	945000
20/11/2019 02:01:06	953000
20/11/2019 02:01:07	955000
20/11/2019 02:01:08	948000
20/11/2019 02:01:09	947000
20/11/2019 02:01:10	946000
20/11/2019 02:01:11	944000
20/11/2019 02:01:12	947000
20/11/2019 02:01:13	932000
20/11/2019 02:01:15	932000
20/11/2019 02:01:16	926000
20/11/2019 02:01:17	924000
20/11/2019 02:01:18	926000
20/11/2019 02:01:19	930000
20/11/2019 02:01:20	926000
20/11/2019 02:01:21	923000
20/11/2019 02:01:22	926000
20/11/2019 02:01:23	925000
20/11/2019 02:01:25	925000
20/11/2019 02:01:26	935000
20/11/2019 02:01:27	935000
20/11/2019 02:01:28	944000
20/11/2019 02:01:29	946000
20/11/2019 02:01:30	942000
20/11/2019 02:01:31	939000
20/11/2019 02:01:32	937000
20/11/2019 02:01:34	936000
20/11/2019 02:01:35	931000
20/11/2019 02:01:36	925000
20/11/2019 02:01:37	924000
20/11/2019 02:01:38	929000
20/11/2019 02:01:39	934000
20/11/2019 02:01:40	931000
20/11/2019 02:01:41	929000
20/11/2019 02:01:42	915000
20/11/2019 02:01:44	915000
20/11/2019 02:01:45	919000
20/11/2019 02:01:46	907000
20/11/2019 02:01:47	929000
20/11/2019 02:01:48	932000
20/11/2019 02:01:49	947000
20/11/2019 02:01:50	953000
20/11/2019 02:01:51	959000
20/11/2019 02:01:52	963000
20/11/2019 02:01:54	960000
20/11/2019 02:01:55	968000
20/11/2019 02:01:56	977000
20/11/2019 02:01:57	979000
20/11/2019 02:01:58	987000
20/11/2019 02:01:59	994000
20/11/2019 02:02:00	998000
20/11/2019 02:02:01	1000000
20/11/2019 02:02:02	1000000
20/11/2019 02:02:04	994000
20/11/2019 02:02:05	994000
20/11/2019 02:02:06	975000
20/11/2019 02:02:07	974000
20/11/2019 02:02:08	971000
20/11/2019 02:02:09	965000
20/11/2019 02:02:10	957000
20/11/2019 02:02:11	948000
20/11/2019 02:02:12	941000
20/11/2019 02:02:14	957000
20/11/2019 02:02:15	958000
20/11/2019 02:02:16	960000
20/11/2019 02:02:17	946000
20/11/2019 02:02:18	954000
20/11/2019 02:02:19	969000
20/11/2019 02:02:20	969000
20/11/2019 02:02:21	969000
20/11/2019 02:02:22	988000
20/11/2019 02:02:24	993000
20/11/2019 02:02:25	997000
20/11/2019 02:02:26	1000000
20/11/2019 02:02:27	994000
20/11/2019 02:02:28	993000
20/11/2019 02:02:29	984000
20/11/2019 02:02:30	984000
20/11/2019 02:02:31	984000
20/11/2019 02:02:33	968000
20/11/2019 02:02:34	970000
20/11/2019 02:02:35	966000
20/11/2019 02:02:36	961000
20/11/2019 02:02:37	966000
20/11/2019 02:02:38	975000
20/11/2019 02:02:39	968000
20/11/2019 02:02:40	975000
20/11/2019 02:02:41	981000
20/11/2019 02:02:43	1010000
20/11/2019 02:02:44	1020000
20/11/2019 02:02:45	1010000
20/11/2019 02:02:46	997000
20/11/2019 02:02:47	1010000
20/11/2019 02:02:48	1010000
20/11/2019 02:02:49	1010000
20/11/2019 02:02:50	996000
20/11/2019 02:02:51	988000
20/11/2019 02:02:53	975000
20/11/2019 02:02:54	977000
20/11/2019 02:02:55	967000
20/11/2019 02:02:56	957000
20/11/2019 02:02:57	962000
20/11/2019 02:02:58	950000
20/11/2019 02:02:59	952000
20/11/2019 02:03:00	946000
20/11/2019 02:03:01	940000
20/11/2019 02:03:02	945000
20/11/2019 02:03:04	938000
20/11/2019 02:03:05	938000
20/11/2019 02:03:06	938000
20/11/2019 02:03:07	944000
20/11/2019 02:03:08	947000
20/11/2019 02:03:09	961000
20/11/2019 02:03:10	961000
20/11/2019 02:03:11	961000
20/11/2019 02:03:12	986000
20/11/2019 02:03:14	974000
20/11/2019 02:03:15	969000
20/11/2019 02:03:16	965000
20/11/2019 02:03:17	974000
20/11/2019 02:03:18	972000
20/11/2019 02:03:19	950000
20/11/2019 02:03:20	955000
20/11/2019 02:03:21	960000
20/11/2019 02:03:22	961000
20/11/2019 02:03:24	970000
20/11/2019 02:03:25	983000
20/11/2019 02:03:26	996000
20/11/2019 02:03:27	1030000
20/11/2019 02:03:28	1030000
20/11/2019 02:03:29	1030000
20/11/2019 02:03:30	1030000
20/11/2019 02:03:31	1040000
20/11/2019 02:03:32	1040000
20/11/2019 02:03:33	1040000
20/11/2019 02:03:35	1040000
20/11/2019 02:03:36	1050000
20/11/2019 02:03:37	1040000
20/11/2019 02:03:38	1040000
20/11/2019 02:03:39	1040000
20/11/2019 02:03:40	1040000
20/11/2019 02:03:41	1040000
20/11/2019 02:03:42	1040000
20/11/2019 02:03:43	1030000
20/11/2019 02:03:45	1040000
20/11/2019 02:03:46	1050000
20/11/2019 02:03:47	1060000
20/11/2019 02:03:48	1080000
20/11/2019 02:03:49	1070000
20/11/2019 02:03:50	1060000
20/11/2019 02:03:51	1060000
20/11/2019 02:03:52	1070000
20/11/2019 02:03:53	1070000
20/11/2019 02:03:55	1070000
20/11/2019 02:03:56	1070000
20/11/2019 02:03:57	1060000
20/11/2019 02:03:58	1060000
20/11/2019 02:03:59	1060000
20/11/2019 02:04:00	1080000
20/11/2019 02:04:01	1100000
20/11/2019 02:04:02	1100000
20/11/2019 02:04:04	1110000
20/11/2019 02:04:05	1090000
20/11/2019 02:04:06	1080000
20/11/2019 02:04:07	1070000
20/11/2019 02:04:08	1080000
20/11/2019 02:04:09	1080000
20/11/2019 02:04:10	1080000
20/11/2019 02:04:16	1080000
20/11/2019 02:04:17	1090000
20/11/2019 02:04:18	1100000
20/11/2019 02:04:19	1100000
20/11/2019 02:04:20	1080000
20/11/2019 02:04:21	1090000
20/11/2019 02:04:22	1090000
20/11/2019 02:04:24	1090000
20/11/2019 02:04:25	1080000
20/11/2019 02:04:26	1070000
20/11/2019 02:04:27	1080000
20/11/2019 02:04:28	1080000
20/11/2019 02:04:29	1080000
20/11/2019 02:04:30	1070000
20/11/2019 02:04:31	1080000
20/11/2019 02:04:32	1080000
20/11/2019 02:04:34	1090000
20/11/2019 02:04:35	1100000
20/11/2019 02:04:36	1110000
20/11/2019 02:04:37	1110000
20/11/2019 02:04:38	1110000
20/11/2019 02:04:39	1110000
20/11/2019 02:04:40	1100000
20/11/2019 02:04:41	1110000
20/11/2019 02:04:42	1110000
20/11/2019 02:04:44	1110000
20/11/2019 02:04:45	1110000
20/11/2019 02:04:46	1120000
20/11/2019 02:04:47	1110000
20/11/2019 02:04:48	1110000
20/11/2019 02:04:49	1110000
20/11/2019 02:04:50	1120000
20/11/2019 02:04:51	1130000
20/11/2019 02:04:52	1120000
20/11/2019 02:04:54	1120000
20/11/2019 02:04:55	1120000
20/11/2019 02:04:56	1130000
20/11/2019 02:04:57	1140000
20/11/2019 02:04:58	1140000
20/11/2019 02:04:59	1140000
20/11/2019 02:05:00	1140000
20/11/2019 02:05:01	1140000
20/11/2019 02:05:02	1130000
20/11/2019 02:05:04	1130000
20/11/2019 02:05:05	1140000
20/11/2019 02:05:06	1160000
20/11/2019 02:05:07	1150000
20/11/2019 02:05:08	1160000
20/11/2019 02:05:09	1160000
20/11/2019 02:05:10	1160000
20/11/2019 02:05:11	1130000
20/11/2019 02:05:12	1130000
20/11/2019 02:05:14	1120000
20/11/2019 02:05:15	1120000
20/11/2019 02:05:16	1120000
20/11/2019 02:05:17	1110000
20/11/2019 02:05:18	1110000
20/11/2019 02:05:19	1110000
20/11/2019 02:05:20	1110000
20/11/2019 02:05:21	1110000
20/11/2019 02:05:22	1110000
20/11/2019 02:05:23	1110000
20/11/2019 02:05:25	1100000
20/11/2019 02:05:26	1090000
20/11/2019 02:05:27	1100000
20/11/2019 02:05:28	1110000
20/11/2019 02:05:29	1100000
20/11/2019 02:05:30	1100000
20/11/2019 02:05:31	1090000
20/11/2019 02:05:32	1110000
20/11/2019 02:05:33	1110000
20/11/2019 02:05:35	1120000
20/11/2019 02:05:36	1130000
20/11/2019 02:05:37	1140000
20/11/2019 02:05:38	1120000
20/11/2019 02:05:39	1130000
20/11/2019 02:05:40	1130000
20/11/2019 02:05:41	1130000
20/11/2019 02:05:42	1130000
20/11/2019 02:05:43	1110000
20/11/2019 02:05:45	1110000
20/11/2019 02:05:46	1110000
20/11/2019 02:05:47	1110000
20/11/2019 02:05:48	1110000
20/11/2019 02:05:49	1110000
20/11/2019 02:05:50	1110000
20/11/2019 02:05:51	1110000
20/11/2019 02:05:52	1100000
20/11/2019 02:05:53	1110000
20/11/2019 02:05:55	1130000
20/11/2019 02:05:56	1140000
20/11/2019 02:05:57	1150000
20/11/2019 02:05:58	1150000
20/11/2019 02:05:59	1150000
20/11/2019 02:06:00	1150000
20/11/2019 02:06:01	1140000
20/11/2019 02:06:02	1140000
20/11/2019 02:06:03	1140000
20/11/2019 02:06:05	1130000
20/11/2019 02:06:06	1130000
20/11/2019 02:06:07	1100000
20/11/2019 02:06:08	1100000
20/11/2019 02:06:09	1090000
20/11/2019 02:06:10	1080000
20/11/2019 02:06:11	1070000
20/11/2019 02:06:12	1080000
20/11/2019 02:06:13	1080000
20/11/2019 02:06:15	1080000
20/11/2019 02:06:16	1080000
20/11/2019 02:06:17	1090000
20/11/2019 02:06:18	1090000
20/11/2019 02:06:19	1100000
20/11/2019 02:06:20	1100000
20/11/2019 02:06:21	1090000
20/11/2019 02:06:22	1090000
20/11/2019 02:06:23	1100000
20/11/2019 02:06:25	1110000
20/11/2019 02:06:26	1110000
20/11/2019 02:06:27	1120000
20/11/2019 02:06:28	1120000
20/11/2019 02:06:29	1130000
20/11/2019 02:06:30	1140000
20/11/2019 02:06:31	1140000
20/11/2019 02:06:32	1140000
20/11/2019 02:06:33	1140000
20/11/2019 02:06:35	1140000
20/11/2019 02:06:36	1140000
20/11/2019 02:06:37	1110000
20/11/2019 02:06:38	1130000
20/11/2019 02:06:39	1130000
20/11/2019 02:06:40	1140000
20/11/2019 02:06:41	1140000
20/11/2019 02:06:42	1150000
20/11/2019 02:06:43	1140000
20/11/2019 02:06:45	1140000
20/11/2019 02:06:46	1140000
20/11/2019 02:06:47	1150000
20/11/2019 02:06:48	1150000
20/11/2019 02:06:49	1130000
20/11/2019 02:06:50	1110000
20/11/2019 02:06:51	1090000
20/11/2019 02:06:52	1090000
20/11/2019 02:06:53	1070000
20/11/2019 02:06:55	1070000
20/11/2019 02:06:56	1060000
20/11/2019 02:06:57	1060000
20/11/2019 02:06:58	1070000
20/11/2019 02:06:59	1070000
20/11/2019 02:07:00	1070000
20/11/2019 02:07:01	1080000
20/11/2019 02:07:02	1100000
20/11/2019 02:07:03	1100000
20/11/2019 02:07:05	1100000
20/11/2019 02:07:06	1100000
20/11/2019 02:07:07	1100000
20/11/2019 02:07:08	1100000
20/11/2019 02:07:09	1090000
20/11/2019 02:07:10	1080000
20/11/2019 02:07:11	1080000
20/11/2019 02:07:12	1060000
20/11/2019 02:07:13	1070000
20/11/2019 02:07:15	1070000
20/11/2019 02:07:16	1070000
20/11/2019 02:07:17	1060000
20/11/2019 02:07:18	1050000
[truncated: 14,149 more rows]

## Sheet: c
Time (UTC)	Sulfate conc. (ug m^-3)	Nitrate conc. (ug m^-3)	Sulfate/Nitrate (mol/mol)
20/11/2019 02:50	0	6.379	0
20/11/2019 02:55	0	7.005	0
20/11/2019 03:00	0.001	7.804	0
20/11/2019 03:05	0	8.604	0
20/11/2019 03:10	0.001	9.133	0
20/11/2019 03:15	0	9.631	0
20/11/2019 03:20	0	9.772	0
20/11/2019 03:25	0	9.737	0
20/11/2019 03:30	0	9.346	0
20/11/2019 03:35	0.003	8.812	0
20/11/2019 03:40	0	8.331	0
20/11/2019 03:45	0	7.983	0
20/11/2019 03:50	0.004	7.39	0
20/11/2019 03:55	0	7.065	0
20/11/2019 04:00	0	6.674	0
20/11/2019 04:05	0	6.267	0
20/11/2019 04:10	0	5.982	0
20/11/2019 04:15	0.004	5.617	0
20/11/2019 04:20	0	5.309	0
20/11/2019 04:25	0	5.051	0
20/11/2019 04:30	0	4.769	0
20/11/2019 04:35	0.002	4.505	0
20/11/2019 04:40	0.004	4.275	0.001
20/11/2019 04:45	0.005	4.043	0.001
20/11/2019 04:50	0.003	3.794	0
20/11/2019 04:55	0.012	3.905	0.002
20/11/2019 05:00	0.009	3.444	0.002
20/11/2019 05:05	0.005	3.197	0.001
20/11/2019 05:10	0.006	3.036	0.001
20/11/2019 05:15	0.014	2.878	0.003
20/11/2019 05:20	0.01	2.708	0.002
20/11/2019 05:25	0.019	2.584	0.005
20/11/2019 05:30	0.015	2.401	0.004
20/11/2019 05:35	0.016	2.292	0.004
20/11/2019 05:40	0.021	2.178	0.006
20/11/2019 05:45	0.019	2.093	0.006
20/11/2019 05:50	0.023	1.966	0.008
20/11/2019 05:55	0.03	1.911	0.01
20/11/2019 06:00	0.033	1.837	0.011
20/11/2019 06:05	0.027	1.731	0.01
20/11/2019 06:10	0.029	1.709	0.011
20/11/2019 06:15	0.036	1.629	0.014
20/11/2019 06:20	0.035	1.566	0.014
20/11/2019 06:25	0.034	1.495	0.015
20/11/2019 06:30	0.025	0.943	0.017
20/11/2019 06:35	0.036	1.381	0.017
20/11/2019 06:40	0.044	1.312	0.022
20/11/2019 06:45	0.045	1.249	0.023
20/11/2019 06:50	0.045	1.17	0.025
20/11/2019 06:55	0.045	1.064	0.027
20/11/2019 07:00	0.054	1.029	0.034
20/11/2019 07:05	0.048	0.938	0.033
20/11/2019 07:10	0.056	0.882	0.041
20/11/2019 07:15	0.054	0.818	0.043
20/11/2019 07:20	0.044	0.746	0.038
20/11/2019 07:25	0.046	0.701	0.042
20/11/2019 07:30	0.047	0.643	0.047
20/11/2019 07:35	0.051	0.603	0.055
20/11/2019 07:40	0.056	0.543	0.067
20/11/2019 07:45	0.052	0.525	0.064
20/11/2019 07:50	0.051	0.473	0.07
20/11/2019 07:55	0.046	0.428	0.07
20/11/2019 08:00	0.045	0.401	0.073

## Sheet: d
Time_1 (UTC)	S_ice_1	f_ice_1		Time_2	S_ice_2	f_ice_2		Time_3	S_ice_3	f_ice_3		Time_4	S_ice_4	f_ice_4		Time_5	S_ice_5	f_ice_5		Time_6	S_ice_6	f_ice_6		Time_7	S_ice_7	f_ice_7		Time_8	S_ice_8	f_ice_8
20/11/2019 03:02	1.11	NaN		20/11/2019 03:34	1.12	NaN		20/11/2019 04:03	1.12	NaN		20/11/2019 04:28	1.12	NaN		20/11/2019 04:55	1.12	NaN		20/11/2019 05:21	1.12	NaN		20/11/2019 05:43	1.2	NaN		20/11/2019 06:08	1.13	NaN
20/11/2019 03:02	1.11	NaN		20/11/2019 03:34	1.12	NaN		20/11/2019 04:03	1.12	NaN		20/11/2019 04:28	1.12	NaN		20/11/2019 04:55	1.12	NaN		20/11/2019 05:21	1.12	NaN		20/11/2019 05:43	1.19	NaN		20/11/2019 06:08	1.13	NaN
20/11/2019 03:02	1.11	NaN		20/11/2019 03:34	1.12	NaN		20/11/2019 04:03	1.12	NaN		20/11/2019 04:28	1.12	NaN		20/11/2019 04:55	1.12	NaN		20/11/2019 05:21	1.12	NaN		20/11/2019 05:43	1.19	NaN		20/11/2019 06:08	1.13	NaN
20/11/2019 03:02	1.11	NaN		20/11/2019 03:34	1.12	NaN		20/11/2019 04:03	1.12	NaN		20/11/2019 04:28	1.12	NaN		20/11/2019 04:55	1.12	NaN		20/11/2019 05:21	1.12	NaN		20/11/2019 05:43	1.18	NaN		20/11/2019 06:08	1.12	NaN
20/11/2019 03:02	1.11	NaN		20/11/2019 03:34	1.12	NaN		20/11/2019 04:03	1.12	NaN		20/11/2019 04:28	1.12	NaN		20/11/2019 04:56	1.12	NaN		20/11/2019 05:21	1.12	NaN		20/11/2019 05:43	1.17	NaN		20/11/2019 06:08	1.12	NaN
20/11/2019 03:02	1.11	NaN		20/11/2019 03:34	1.12	NaN		20/11/2019 04:03	1.12	NaN		20/11/2019 04:28	1.12	NaN		20/11/2019 04:56	1.12	NaN		20/11/2019 05:21	1.12	NaN		20/11/2019 05:43	1.17	NaN		20/11/2019 06:08	1.12	NaN
20/11/2019 03:03	1.11	NaN		20/11/2019 03:35	1.12	NaN		20/11/2019 04:04	1.12	NaN		20/11/2019 04:29	1.12	NaN		20/11/2019 04:56	1.12	NaN		20/11/2019 05:22	1.12	NaN		20/11/2019 05:44	1.16	NaN		20/11/2019 06:09	1.12	NaN
20/11/2019 03:03	1.11	NaN		20/11/2019 03:35	1.12	NaN		20/11/2019 04:04	1.12	NaN		20/11/2019 04:29	1.12	NaN		20/11/2019 04:56	1.12	NaN		20/11/2019 05:22	1.12	NaN		20/11/2019 05:44	1.15	NaN		20/11/2019 06:09	1.12	NaN
20/11/2019 03:03	1.11	NaN		20/11/2019 03:35	1.12	NaN		20/11/2019 04:04	1.12	NaN		20/11/2019 04:29	1.12	NaN		20/11/2019 04:56	1.12	NaN		20/11/2019 05:22	1.12	NaN		20/11/2019 05:44	1.15	NaN		20/11/2019 06:09	1.12	NaN
20/11/2019 03:03	1.11	NaN		20/11/2019 03:35	1.12	NaN		20/11/2019 04:04	1.12	NaN		20/11/2019 04:29	1.12	NaN		20/11/2019 04:56	1.12	NaN		20/11/2019 05:22	1.12	NaN		20/11/2019 05:44	1.15	NaN		20/11/2019 06:09	1.12	NaN
20/11/2019 03:03	1.11	NaN		20/11/2019 03:35	1.12	NaN		20/11/2019 04:04	1.12	NaN		20/11/2019 04:29	1.12	NaN		20/11/2019 04:57	1.12	NaN		20/11/2019 05:22	1.12	NaN		20/11/2019 05:44	1.14	NaN		20/11/2019 06:09	1.12	NaN
20/11/2019 03:03	1.11	NaN		20/11/2019 03:35	1.12	NaN		20/11/2019 04:04	1.12	NaN		20/11/2019 04:29	1.12	NaN		20/11/2019 04:57	1.12	NaN		20/11/2019 05:22	1.12	NaN		20/11/2019 05:44	1.14	NaN		20/11/2019 06:09	1.12	NaN
20/11/2019 03:04	1.11	NaN		20/11/2019 03:36	1.12	NaN		20/11/2019 04:05	1.12	NaN		20/11/2019 04:30	1.12	NaN		20/11/2019 04:57	1.12	NaN		20/11/2019 05:23	1.12	NaN		20/11/2019 05:45	1.14	NaN		20/11/2019 06:10	1.12	NaN
20/11/2019 03:04	1.11	NaN		20/11/2019 03:36	1.12	NaN		20/11/2019 04:05	1.12	NaN		20/11/2019 04:30	1.12	NaN		20/11/2019 04:57	1.12	NaN		20/11/2019 05:23	1.12	NaN		20/11/2019 05:45	1.13	NaN		20/11/2019 06:10	1.12	NaN
20/11/2019 03:04	1.11	NaN		20/11/2019 03:36	1.12	NaN		20/11/2019 04:05	1.12	NaN		20/11/2019 04:30	1.12	NaN		20/11/2019 04:57	1.12	NaN		20/11/2019 05:23	1.12	NaN		20/11/2019 05:45	1.13	NaN		20/11/2019 06:10	1.12	NaN
20/11/2019 03:04	1.12	NaN		20/11/2019 03:36	1.12	NaN		20/11/2019 04:05	1.12	NaN		20/11/2019 04:30	1.12	NaN		20/11/2019 04:57	1.12	NaN		20/11/2019 05:23	1.12	NaN		20/11/2019 05:45	1.13	NaN		20/11/2019 06:10	1.12	NaN
20/11/2019 03:04	1.12	NaN		20/11/2019 03:36	1.12	NaN		20/11/2019 04:05	1.12	NaN		20/11/2019 04:30	1.12	NaN		20/11/2019 04:58	1.12	NaN		20/11/2019 05:23	1.12	NaN		20/11/2019 05:45	1.13	NaN		20/11/2019 06:10	1.12	NaN
20/11/2019 03:04	1.12	NaN		20/11/2019 03:36	1.12	NaN		20/11/2019 04:05	1.12	NaN		20/11/2019 04:30	1.12	NaN		20/11/2019 04:58	1.12	NaN		20/11/2019 05:23	1.12	NaN		20/11/2019 05:45	1.13	NaN		20/11/2019 06:10	1.12	NaN
20/11/2019 03:05	1.12	NaN		20/11/2019 03:37	1.12	NaN		20/11/2019 04:06	1.13	NaN		20/11/2019 04:31	1.12	NaN		20/11/2019 04:58	1.13	NaN		20/11/2019 05:24	1.13	NaN		20/11/2019 05:46	1.13	NaN		20/11/2019 06:11	1.12	NaN
20/11/2019 03:05	1.12	NaN		20/11/2019 03:37	1.12	NaN		20/11/2019 04:06	1.13	NaN		20/11/2019 04:31	1.12	NaN		20/11/2019 04:58	1.13	NaN		20/11/2019 05:24	1.13	NaN		20/11/2019 05:46	1.13	NaN		20/11/2019 06:11	1.12	NaN
20/11/2019 03:05	1.12	NaN		20/11/2019 03:37	1.12	NaN		20/11/2019 04:06	1.13	NaN		20/11/2019 04:31	1.12	NaN		20/11/2019 04:58	1.13	NaN		20/11/2019 05:24	1.13	NaN		20/11/2019 05:46	1.13	NaN		20/11/2019 06:11	1.13	NaN
20/11/2019 03:05	1.12	NaN		20/11/2019 03:37	1.12	NaN		20/11/2019 04:06	1.13	NaN		20/11/2019 04:31	1.12	NaN		20/11/2019 04:58	1.13	NaN		20/11/2019 05:24	1.13	NaN		20/11/2019 05:46	1.13	NaN		20/11/2019 06:11	1.13	NaN
20/11/2019 03:05	1.12	NaN		20/11/2019 03:37	1.12	NaN		20/11/2019 04:06	1.13	NaN		20/11/2019 04:31	1.12	NaN		20/11/2019 04:59	1.14	NaN		20/11/2019 05:24	1.13	NaN		20/11/2019 05:46	1.13	NaN		20/11/2019 06:11	1.13	NaN
20/11/2019 03:05	1.12	NaN		20/11/2019 03:37	1.12	NaN		20/11/2019 04:06	1.14	NaN		20/11/2019 04:31	1.12	NaN		20/11/2019 04:59	1.14	NaN		20/11/2019 05:24	1.14	NaN		20/11/2019 05:46	1.13	NaN		20/11/2019 06:11	1.13	NaN
20/11/2019 03:06	1.13	NaN		20/11/2019 03:38	1.13	NaN		20/11/2019 04:07	1.14	NaN		20/11/2019 04:32	1.13	NaN		20/11/2019 04:59	1.14	NaN		20/11/2019 05:25	1.14	NaN		20/11/2019 05:47	1.13	NaN		20/11/2019 06:12	1.13	NaN
20/11/2019 03:06	1.13	NaN		20/11/2019 03:38	1.13	NaN		20/11/2019 04:07	1.14	NaN		20/11/2019 04:32	1.13	NaN		20/11/2019 04:59	1.14	NaN		20/11/2019 05:25	1.14	NaN		20/11/2019 05:47	1.13	NaN		20/11/2019 06:12	1.14	NaN
20/11/2019 03:06	1.13	NaN		20/11/2019 03:38	1.13	NaN		20/11/2019 04:07	1.15	NaN		20/11/2019 04:32	1.13	NaN		20/11/2019 04:59	1.15	NaN		20/11/2019 05:25	1.15	NaN		20/11/2019 05:47	1.14	NaN		20/11/2019 06:12	1.14	NaN
20/11/2019 03:06	1.13	NaN		20/11/2019 03:38	1.13	NaN		20/11/2019 04:07	1.15	NaN		20/11/2019 04:32	1.13	NaN		20/11/2019 04:59	1.15	NaN		20/11/2019 05:25	1.15	NaN		20/11/2019 05:47	1.14	NaN		20/11/2019 06:12	1.14	NaN
20/11/2019 03:06	1.14	NaN		20/11/2019 03:38	1.14	NaN		20/11/2019 04:07	1.15	NaN		20/11/2019 04:32	1.14	NaN		20/11/2019 05:00	1.15	NaN		20/11/2019 05:25	1.15	NaN		20/11/2019 05:47	1.14	NaN		20/11/2019 06:12	1.14	NaN
20/11/2019 03:06	1.14	NaN		20/11/2019 03:38	1.14	NaN		20/11/2019 04:07	1.16	NaN		20/11/2019 04:32	1.14	NaN		20/11/2019 05:00	1.16	NaN		20/11/2019 05:25	1.16	NaN		20/11/2019 05:47	1.14	NaN		20/11/2019 06:12	1.15	NaN
20/11/2019 03:07	1.14	NaN		20/11/2019 03:39	1.14	NaN		20/11/2019 04:08	1.16	NaN		20/11/2019 04:33	1.14	NaN		20/11/2019 05:00	1.16	NaN		20/11/2019 05:26	1.16	NaN		20/11/2019 05:48	1.15	NaN		20/11/2019 06:13	1.15	NaN
20/11/2019 03:07	1.14	NaN		20/11/2019 03:39	1.15	NaN		20/11/2019 04:08	1.16	NaN		20/11/2019 04:33	1.14	NaN		20/11/2019 05:00	1.16	NaN		20/11/2019 05:26	1.16	NaN		20/11/2019 05:48	1.15	NaN		20/11/2019 06:13	1.16	NaN
20/11/2019 03:07	1.15	NaN		20/11/2019 03:39	1.15	NaN		20/11/2019 04:08	1.17	NaN		20/11/2019 04:33	1.15	NaN		20/11/2019 05:00	1.17	NaN		20/11/2019 05:26	1.17	NaN		20/11/2019 05:48	1.15	NaN		20/11/2019 06:13	1.16	NaN
20/11/2019 03:07	1.15	NaN		20/11/2019 03:39	1.15	NaN		20/11/2019 04:08	1.17	NaN		20/11/2019 04:33	1.15	NaN		20/11/2019 05:00	1.17	NaN		20/11/2019 05:26	1.17	NaN		20/11/2019 05:48	1.16	NaN		20/11/2019 06:13	1.16	NaN
20/11/2019 03:07	1.15	NaN		20/11/2019 03:39	1.15	NaN		20/11/2019 04:08	1.18	NaN		20/11/2019 04:33	1.15	NaN		20/11/2019 05:01	1.18	NaN		20/11/2019 05:26	1.18	NaN		20/11/2019 05:48	1.16	NaN		20/11/2019 06:13	1.17	NaN
20/11/2019 03:07	1.16	NaN		20/11/2019 03:39	1.16	NaN		20/11/2019 04:08	1.18	NaN		20/11/2019 04:33	1.16	NaN		20/11/2019 05:01	1.18	NaN		20/11/2019 05:26	1.18	NaN		20/11/2019 05:48	1.17	NaN		20/11/2019 06:13	1.17	NaN
20/11/2019 03:08	1.16	NaN		20/11/2019 03:40	1.16	NaN		20/11/2019 04:09	1.19	NaN		20/11/2019 04:34	1.16	NaN		20/11/2019 05:01	1.19	NaN		20/11/2019 05:27	1.18	NaN		20/11/2019 05:49	1.17	NaN		20/11/2019 06:14	1.18	NaN
20/11/2019 03:08	1.17	NaN		20/11/2019 03:40	1.17	NaN		20/11/2019 04:09	1.19	NaN		20/11/2019 04:34	1.17	NaN		20/11/2019 05:01	1.19	NaN		20/11/2019 05:27	1.19	NaN		20/11/2019 05:49	1.17	NaN		20/11/2019 06:14	1.18	NaN
20/11/2019 03:08	1.17	NaN		20/11/2019 03:40	1.17	NaN		20/11/2019 04:09	1.2	NaN		20/11/2019 04:34	1.17	NaN		20/11/2019 05:01	1.2	NaN		20/11/2019 05:27	1.19	NaN		20/11/2019 05:49	1.18	NaN		20/11/2019 06:14	1.18	NaN
20/11/2019 03:08	1.17	NaN		20/11/2019 03:40	1.17	NaN		20/11/2019 04:09	1.2	NaN		20/11/2019 04:34	1.17	NaN		20/11/2019 05:01	1.2	NaN		20/11/2019 05:27	1.2	NaN		20/11/2019 05:49	1.18	NaN		20/11/2019 06:14	1.19	NaN
20/11/2019 03:08	1.18	NaN		20/11/2019 03:40	1.18	NaN		20/11/2019 04:09	1.21	NaN		20/11/2019 04:34	1.18	NaN		20/11/2019 05:02	1.21	NaN		20/11/2019 05:27	1.2	NaN		20/11/2019 05:49	1.19	NaN		20/11/2019 06:14	1.19	NaN
20/11/2019 03:08	1.18	NaN		20/11/2019 03:40	1.18	NaN		20/11/2019 04:09	1.21	NaN		20/11/2019 04:34	1.18	NaN		20/11/2019 05:02	1.21	NaN		20/11/2019 05:27	1.21	NaN		20/11/2019 05:49	1.19	NaN		20/11/2019 06:14	1.2	NaN
20/11/2019 03:09	1.19	NaN		20/11/2019 03:41	1.19	NaN		20/11/2019 04:10	1.22	NaN		20/11/2019 04:35	1.19	NaN		20/11/2019 05:02	1.22	NaN		20/11/2019 05:28	1.21	NaN		20/11/2019 05:50	1.2	NaN		20/11/2019 06:15	1.2	NaN
20/11/2019 03:09	1.19	NaN		20/11/2019 03:41	1.19	NaN		20/11/2019 04:10	1.22	NaN		20/11/2019 04:35	1.19	NaN		20/11/2019 05:02	1.22	NaN		20/11/2019 05:28	1.22	NaN		20/11/2019 05:50	1.2	NaN		20/11/2019 06:15	1.21	NaN
20/11/2019 03:09	1.2	NaN		20/11/2019 03:41	1.2	NaN		20/11/2019 04:10	1.23	NaN		20/11/2019 04:35	1.2	NaN		20/11/2019 05:02	1.23	NaN		20/11/2019 05:28	1.23	NaN		20/11/2019 05:50	1.21	NaN		20/11/2019 06:15	1.21	NaN
20/11/2019 03:09	1.2	NaN		20/11/2019 03:41	1.2	NaN		20/11/2019 04:10	1.23	NaN		20/11/2019 04:35	1.2	NaN		20/11/2019 05:02	1.23	NaN		20/11/2019 05:28	1.23	NaN		20/11/2019 05:50	1.21	NaN		20/11/2019 06:15	1.22	NaN
20/11/2019 03:09	1.21	NaN		20/11/2019 03:41	1.21	NaN		20/11/2019 04:10	1.24	NaN		20/11/2019 04:35	1.21	NaN		20/11/2019 05:03	1.24	NaN		20/11/2019 05:28	1.24	NaN		20/11/2019 05:50	1.22	NaN		20/11/2019 06:15	1.22	6.52e-05
20/11/2019 03:09	1.21	NaN		20/11/2019 03:41	1.21	NaN		20/11/2019 04:10	1.24	NaN		20/11/2019 04:35	1.21	NaN		20/11/2019 05:03	1.25	NaN		20/11/2019 05:28	1.24	NaN		20/11/2019 05:50	1.22	NaN		20/11/2019 06:15	1.23	9.08e-05
20/11/2019 03:10	1.21	NaN		20/11/2019 03:42	1.22	NaN		20/11/2019 04:11	1.25	NaN		20/11/2019 04:36	1.22	NaN		20/11/2019 05:03	1.25	NaN		20/11/2019 05:29	1.25	NaN		20/11/2019 05:51	1.23	NaN		20/11/2019 06:16	1.24	0.000103
20/11/2019 03:10	1.22	NaN		20/11/2019 03:42	1.22	NaN		20/11/2019 04:11	1.25	NaN		20/11/2019 04:36	1.22	NaN		20/11/2019 05:03	1.26	NaN		20/11/2019 05:29	1.26	NaN		20/11/2019 05:51	1.23	5.14e-05		20/11/2019 06:16	1.24	0.000146
20/11/2019 03:10	1.23	NaN		20/11/2019 03:42	1.23	NaN		20/11/2019 04:11	1.26	NaN		20/11/2019 04:36	1.23	NaN		20/11/2019 05:03	1.26	NaN		20/11/2019 05:29	1.26	NaN		20/11/2019 05:51	1.24	6.81e-05		20/11/2019 06:16	1.25	0.000179
20/11/2019 03:10	1.23	NaN		20/11/2019 03:42	1.24	NaN		20/11/2019 04:11	1.27	NaN		20/11/2019 04:36	1.23	NaN		20/11/2019 05:03	1.27	NaN		20/11/2019 05:29	1.27	NaN		20/11/2019 05:51	1.25	9.34e-05		20/11/2019 06:16	1.25	0.000216
20/11/2019 03:10	1.24	NaN		20/11/2019 03:42	1.24	NaN		20/11/2019 04:11	1.27	NaN		20/11/2019 04:36	1.24	NaN		20/11/2019 05:04	1.28	NaN		20/11/2019 05:29	1.27	NaN		20/11/2019 05:51	1.25	8.21e-05		20/11/2019 06:16	1.26	0.000273
20/11/2019 03:10	1.24	NaN		20/11/2019 03:42	1.25	NaN		20/11/2019 04:11	1.28	NaN		20/11/2019 04:36	1.25	NaN		20/11/2019 05:04	1.28	NaN		20/11/2019 05:29	1.28	NaN		20/11/2019 05:51	1.26	0.00015		20/11/2019 06:16	1.27	0.000331
20/11/2019 03:11	1.25	NaN		20/11/2019 03:43	1.25	NaN		20/11/2019 04:12	1.29	NaN		20/11/2019 04:37	1.25	NaN		20/11/2019 05:04	1.29	NaN		20/11/2019 05:30	1.29	NaN		20/11/2019 05:52	1.26	0.000204		20/11/2019 06:17	1.27	0.000538
20/11/2019 03:11	1.25	NaN		20/11/2019 03:43	1.26	NaN		20/11/2019 04:12	1.29	NaN		20/11/2019 04:37	1.26	NaN		20/11/2019 05:04	1.29	NaN		20/11/2019 05:30	1.29	6.7e-05		20/11/2019 05:52	1.27	0.000255		20/11/2019 06:17	1.28	0.000686
20/11/2019 03:11	1.26	NaN		20/11/2019 03:43	1.27	NaN		20/11/2019 04:12	1.3	NaN		20/11/2019 04:37	1.26	NaN		20/11/2019 05:04	1.3	NaN		20/11/2019 05:30	1.3	9.71e-05		20/11/2019 05:52	1.28	0.000196		20/11/2019 06:17	1.29	0.000639
20/11/2019 03:11	1.26	NaN		20/11/2019 03:43	1.27	NaN		20/11/2019 04:12	1.3	NaN		20/11/2019 04:37	1.27	NaN		20/11/2019 05:04	1.3	NaN		20/11/2019 05:30	1.3	0.000126		20/11/2019 05:52	1.28	0.000292		20/11/2019 06:17	1.29	0.000823
20/11/2019 03:11	1.27	NaN		20/11/2019 03:43	1.28	NaN		20/11/2019 04:12	1.31	NaN		20/11/2019 04:37	1.28	NaN		20/11/2019 05:05	1.31	NaN		20/11/2019 05:30	1.31	9.01e-05		20/11/2019 05:52	1.29	0.000423		20/11/2019 06:17	1.3	0.000871
20/11/2019 03:11	1.27	NaN		20/11/2019 03:43	1.28	NaN		20/11/2019 04:12	1.31	NaN		20/11/2019 04:37	1.28	NaN		20/11/2019 05:05	1.32	NaN		20/11/2019 05:30	1.31	0.000118		20/11/2019 05:52	1.3	0.000562		20/11/2019 06:17	1.3	0.00104
20/11/2019 03:12	1.28	NaN		20/11/2019 03:44	1.29	NaN		20/11/2019 04:13	1.32	NaN		20/11/2019 04:38	1.29	NaN		20/11/2019 05:05	1.32	NaN		20/11/2019 05:31	1.32	0.000137		20/11/2019 05:53	1.3	0.000539		20/11/2019 06:18	1.31	0.00112
20/11/2019 03:12	1.28	NaN		20/11/2019 03:44	1.29	NaN		20/11/2019 04:13	1.32	NaN		20/11/2019 04:38	1.3	NaN		20/11/2019 05:05	1.32	NaN		20/11/2019 05:31	1.32	0.000191		20/11/2019 05:53	1.31	0.000451		20/11/2019 06:18	1.31	0.00134
20/11/2019 03:12	1.29	NaN		20/11/2019 03:44	1.3	NaN		20/11/2019 04:13	1.33	NaN		20/11/2019 04:38	1.3	NaN		20/11/2019 05:05	1.33	NaN		20/11/2019 05:31	1.33	0.00019		20/11/2019 05:53	1.31	0.000656		20/11/2019 06:18	1.32	0.00138
20/11/2019 03:12	1.29	NaN		20/11/2019 03:44	1.3	NaN		20/11/2019 04:13	1.34	NaN		20/11/2019 04:38	1.31	NaN		20/11/2019 05:05	1.34	NaN		20/11/2019 05:31	1.33	0.000206		20/11/2019 05:53	1.32	0.000712		20/11/2019 06:18	1.32	0.00141
20/11/2019 03:12	1.3	NaN		20/11/2019 03:44	1.31	NaN		20/11/2019 04:13	1.34	NaN		20/11/2019 04:38	1.31	NaN		20/11/2019 05:06	1.34	NaN		20/11/2019 05:31	1.34	0.00029		20/11/2019 05:53	1.32	0.000857		20/11/2019 06:18	1.33	0.00148
20/11/2019 03:12	1.3	NaN		20/11/2019 03:44	1.31	NaN		20/11/2019 04:13	1.35	NaN		20/11/2019 04:38	1.32	NaN		20/11/2019 05:06	1.35	NaN		20/11/2019 05:31	1.35	0.000269		20/11/2019 05:53	1.33	0.00101		20/11/2019 06:18	1.33	0.00181
20/11/2019 03:13	1.31	NaN		20/11/2019 03:45	1.32	NaN		20/11/2019 04:14	1.35	NaN		20/11/2019 04:39	1.32	NaN		20/11/2019 05:06	1.36	NaN		20/11/2019 05:32	1.35	0.000338		20/11/2019 05:54	1.33	0.00104		20/11/2019 06:19	1.34	0.00214
20/11/2019 03:13	1.31	NaN		20/11/2019 03:45	1.32	NaN		20/11/2019 04:14	1.36	NaN		20/11/2019 04:39	1.33	NaN		20/11/2019 05:06	1.36	NaN		20/11/2019 05:32	1.36	0.000386		20/11/2019 05:54	1.34	0.00116		20/11/2019 06:19	1.35	0.00248
20/11/2019 03:13	1.32	NaN		20/11/2019 03:45	1.33	NaN		20/11/2019 04:14	1.37	NaN		20/11/2019 04:39	1.33	NaN		20/11/2019 05:06	1.37	NaN		20/11/2019 05:32	1.37	0.000452		20/11/2019 05:54	1.34	0.00144		20/11/2019 06:19	1.35	0.00257
20/11/2019 03:13	1.32	NaN		20/11/2019 03:45	1.33	NaN		20/11/2019 04:14	1.38	NaN		20/11/2019 04:39	1.34	NaN		20/11/2019 05:06	1.38	NaN		20/11/2019 05:32	1.37	0.000505		20/11/2019 05:54	1.35	0.00164		20/11/2019 06:19	1.36	0.00262
20/11/2019 03:13	1.33	NaN		20/11/2019 03:45	1.34	NaN		20/11/2019 04:14	1.38	NaN		20/11/2019 04:39	1.34	NaN		20/11/2019 05:07	1.38	NaN		20/11/2019 05:32	1.38	0.000623		20/11/2019 05:54	1.36	0.00188		20/11/2019 06:19	1.36	0.00282
20/11/2019 03:13	1.34	NaN		20/11/2019 03:45	1.35	NaN		20/11/2019 04:14	1.39	NaN		20/11/2019 04:39	1.35	NaN		20/11/2019 05:07	1.39	NaN		20/11/2019 05:32	1.39	0.000842		20/11/2019 05:54	1.36	0.00193		20/11/2019 06:19	1.37	0.00353
20/11/2019 03:14	1.34	NaN		20/11/2019 03:46	1.35	NaN		20/11/2019 04:15	1.4	NaN		20/11/2019 04:40	1.36	NaN		20/11/2019 05:07	1.4	6.36e-05		20/11/2019 05:33	1.4	0.00088		20/11/2019 05:55	1.37	0.00226		20/11/2019 06:20	1.38	0.00352
20/11/2019 03:14	1.35	NaN		20/11/2019 03:46	1.36	NaN		20/11/2019 04:15	1.41	NaN		20/11/2019 04:40	1.36	NaN		20/11/2019 05:07	1.41	NaN		20/11/2019 05:33	1.4	0.00105		20/11/2019 05:55	1.38	0.0027		20/11/2019 06:20	1.39	0.00421
20/11/2019 03:14	1.36	NaN		20/11/2019 03:46	1.37	NaN		20/11/2019 04:15	1.42	NaN		20/11/2019 04:40	1.37	NaN		20/11/2019 05:07	1.42	NaN		20/11/2019 05:33	1.41	0.00131		20/11/2019 05:55	1.38	0.00276		20/11/2019 06:20	1.39	0.00478
20/11/2019 03:14	1.36	NaN		20/11/2019 03:46	1.38	NaN		20/11/2019 04:15	1.42	NaN		20/11/2019 04:40	1.38	NaN		20/11/2019 05:07	1.43	7.81e-05		20/11/2019 05:33	1.42	0.00138		20/11/2019 05:55	1.39	0.00317		20/11/2019 06:20	1.4	0.00497
20/11/2019 03:14	1.37	NaN		20/11/2019 03:46	1.39	NaN		20/11/2019 04:15	1.43	NaN		20/11/2019 04:40	1.38	NaN		20/11/2019 05:08	1.44	6.36e-05		20/11/2019 05:33	1.43	0.00154		20/11/2019 05:55	1.4	0.00359		20/11/2019 06:20	1.41	0.0052
20/11/2019 03:14	1.38	NaN		20/11/2019 03:46	1.39	NaN		20/11/2019 04:15	1.44	NaN		20/11/2019 04:40	1.39	NaN		20/11/2019 05:08	1.44	6.87e-05		20/11/2019 05:33	1.44	0.00178		20/11/2019 05:55	1.41	0.00409		20/11/2019 06:20	1.42	0.00587
20/11/2019 03:15	1.39	NaN		20/11/2019 03:47	1.4	NaN		20/11/2019 04:16	1.45	NaN		20/11/2019 04:41	1.4	NaN		20/11/2019 05:08	1.45	0.000107		20/11/2019 05:34	1.45	0.00201		20/11/2019 05:56	1.42	0.00463		20/11/2019 06:21	1.43	0.00652
20/11/2019 03:15	1.4	NaN		20/11/2019 03:47	1.41	NaN		20/11/2019 04:16	1.46	NaN		20/11/2019 04:41	1.41	NaN		20/11/2019 05:08	1.46	0.000117		20/11/2019 05:34	1.46	0.00219		20/11/2019 05:56	1.43	0.00517		20/11/2019 06:21	1.44	0.00729
20/11/2019 03:15	1.4	NaN		20/11/2019 03:47	1.42	NaN		20/11/2019 04:16	1.47	NaN		20/11/2019 04:41	1.42	NaN		20/11/2019 05:08	1.47	0.000186		20/11/2019 05:34	1.47	0.00263		20/11/2019 05:56	1.44	0.00604		20/11/2019 06:21	1.45	0.00799
20/11/2019 03:15	1.41	NaN		20/11/2019 03:47	1.43	NaN		20/11/2019 04:16	1.48	NaN		20/11/2019 04:41	1.43	NaN		20/11/2019 05:08	1.49	0.000151		20/11/2019 05:34	1.48	0.0028		20/11/2019 05:56	1.45	0.00622		20/11/2019 06:21	1.46	0.00893
20/11/2019 03:15	1.42	NaN		20/11/2019 03:47	1.44	NaN		20/11/2019 04:16	1.5	NaN		20/11/2019 04:41	1.44	NaN		20/11/2019 05:09	1.5	0.000185		20/11/2019 05:34	1.49	0.00315		20/11/2019 05:56	1.46	0.00687		20/11/2019 06:21	1.47	0.00987
20/11/2019 03:15	1.43	NaN		20/11/2019 03:47	1.45	NaN		20/11/2019 04:16	1.51	NaN		20/11/2019 04:41	1.45	NaN		20/11/2019 05:09	1.51	0.000192		20/11/2019 05:34	1.5	0.00343		20/11/2019 05:56	1.47	0.00792		20/11/2019 06:21	1.48	0.0116
20/11/2019 03:16	1.44	NaN		20/11/2019 03:48	1.46	NaN		20/11/2019 04:17	1.52	NaN		20/11/2019 04:42	1.46	NaN		20/11/2019 05:09	1.52	0.000177		20/11/2019 05:35	1.52	0.00344		20/11/2019 05:57	1.48	0.0086		20/11/2019 06:22	1.49	0.0129
20/11/2019 03:16	1.45	NaN		20/11/2019 03:48	1.47	NaN		20/11/2019 04:17	1.53	NaN		20/11/2019 04:42	1.47	NaN		20/11/2019 05:09	1.53	0.000268		20/11/2019 05:35	1.53	0.00401		20/11/2019 05:57	1.49	0.00951		20/11/2019 06:22	1.5	0.0145
20/11/2019 03:16	1.46	NaN		20/11/2019 03:48	1.48	NaN		20/11/2019 04:17	1.54	NaN		20/11/2019 04:42	1.48	NaN		20/11/2019 05:09	1.54	0.00026		20/11/2019 05:35	1.54	0.00443		20/11/2019 05:57	1.5	0.0107		20/11/2019 06:22	1.51	0.0162
20/11/2019 03:16	1.47	NaN		20/11/2019 03:48	1.49	NaN		20/11/2019 04:17	1.56	NaN		20/11/2019 04:42	1.49	NaN		20/11/2019 05:09	1.56	0.00032		20/11/2019 05:35	1.55	0.00512		20/11/2019 05:57	1.51	0.0116		20/11/2019 06:22	1.52	0.0185
20/11/2019 03:16	1.48	NaN		20/11/2019 03:48	1.51	NaN		20/11/2019 04:17	1.57	NaN		20/11/2019 04:42	1.5	NaN		20/11/2019 05:10	1.57	0.000381		20/11/2019 05:35	1.56	0.00564		20/11/2019 05:57	1.52	0.0132		20/11/2019 06:22	1.54	0.0217
20/11/2019 03:16	1.49	NaN		20/11/2019 03:48	1.52	NaN		20/11/2019 04:17	1.58	NaN		20/11/2019 04:42	1.51	NaN		20/11/2019 05:10	1.58	0.000395		20/11/2019 05:35	1.58	0.00634		20/11/2019 05:57	1.53	0.0157		20/11/2019 06:22	1.55	0.0264
20/11/2019 03:17	1.5	NaN		20/11/2019 03:49	1.53	NaN		20/11/2019 04:18	1.6	5.5e-05		20/11/2019 04:43	1.52	NaN		20/11/2019 05:10	1.59	0.000451		20/11/2019 05:36	1.59	0.00752		20/11/2019 05:58	1.54	0.0165		20/11/2019 06:23	1.56	0.0291
20/11/2019 03:17	1.52	NaN		20/11/2019 03:49	1.54	NaN		20/11/2019 04:18	1.61	6.02e-05		20/11/2019 04:43	1.53	NaN		20/11/2019 05:10	1.61	0.000428		20/11/2019 05:36	1.6	0.00858		20/11/2019 05:58	1.56	0.0191		20/11/2019 06:23	1.57	0.0326
20/11/2019 03:17	1.53	NaN		20/11/2019 03:49	1.55	NaN		20/11/2019 04:18	1.62	0.000132		20/11/2019 04:43	1.55	NaN		20/11/2019 05:10	1.62	0.000984		20/11/2019 05:36	1.62	0.0104		20/11/2019 05:58	1.57	0.0215		20/11/2019 06:23	1.59	0.039
20/11/2019 03:17	1.54	NaN		20/11/2019 03:49	1.57	NaN		20/11/2019 04:18	1.63	0.00567		20/11/2019 04:43	1.56	NaN		20/11/2019 05:10	1.64	0.00768		20/11/2019 05:36	1.63	0.0142		20/11/2019 05:58	1.58	0.0256		20/11/2019 06:23	1.6	0.0438
20/11/2019 03:17	1.55	NaN		20/11/2019 03:49	1.58	NaN		20/11/2019 04:18	1.65	0.0233		20/11/2019 04:43	1.57	6.43e-05		20/11/2019 05:11	1.65	0.0286		20/11/2019 05:36	1.65	0.0296		20/11/2019 05:58	1.6	0.0294		20/11/2019 06:23	1.61	0.0575
20/11/2019 03:17	1.56	NaN		20/11/2019 03:49	1.59	NaN		20/11/2019 04:18	1.67	0.0645		20/11/2019 04:43	1.58	7.14e-05		20/11/2019 05:11	1.67	0.068		20/11/2019 05:36	1.66	0.0622		20/11/2019 05:58	1.61	0.035		20/11/2019 06:23	1.63	0.0717
20/11/2019 03:18	1.57	NaN		20/11/2019 03:50	1.61	NaN		20/11/2019 04:19	1.68	0.117		20/11/2019 04:44	1.6	5.33e-05		20/11/2019 05:11	1.68	0.127		20/11/2019 05:37	1.68	0.112		20/11/2019 05:59	1.62	0.0412		20/11/2019 06:24	1.64	0.084
20/11/2019 03:18	1.59	NaN		20/11/2019 03:50	1.62	9.9e-05		20/11/2019 04:19	1.7	0.178		20/11/2019 04:44	1.61	0.000109		20/11/2019 05:11	1.7	0.196		20/11/2019 05:37	1.69	0.17		20/11/2019 05:59	1.64	0.0525		20/11/2019 06:24	1.66	0.108
20/11/2019 03:18	1.6	NaN		20/11/2019 03:50	1.64	0.00354		20/11/2019 04:19	1.71	0.235		20/11/2019 04:44	1.62	0.00085		20/11/2019 05:11	1.71	0.258		20/11/2019 05:37	1.71	0.219		20/11/2019 05:59	1.65	0.0692		20/11/2019 06:24	1.67	0.137
20/11/2019 03:18	1.61	NaN		20/11/2019 03:50	1.65	0.0224		20/11/2019 04:19	1.72	0.277		20/11/2019 04:44	1.64	0.0107		20/11/2019 05:11	1.73	0.298		20/11/2019 05:37	1.72	0.282		20/11/2019 05:59	1.67	0.108		20/11/2019 06:24	1.69	0.168
20/11/2019 03:18	1.63	0.00024		20/11/2019 03:50	1.67	0.0614		20/11/2019 04:19	1.74	0.314		20/11/2019 04:44	1.65	0.037		20/11/2019 05:12	1.75	0.353		20/11/2019 05:37	1.74	0.314		20/11/2019 05:59	1.68	0.147		20/11/2019 06:24	1.7	0.203
20/11/2019 03:18	1.64	0.00594		20/11/2019 03:50	1.68	0.117		20/11/2019 04:19	1.76	0.355		20/11/2019 04:44	1.67	0.0773		20/11/2019 05:12	1.76	0.372		20/11/2019 05:37	1.75	0.358		20/11/2019 05:59	1.69	0.188		20/11/2019 06:24	1.72	0.256
20/11/2019 03:19	1.65	0.0238		20/11/2019 03:51	1.69	0.103		20/11/2019 04:20	1.77	0.366		20/11/2019 04:45	1.68	0.13		20/11/2019 05:12	1.78	0.386		20/11/2019 05:38	1.77	0.38		20/11/2019 06:00	1.71	0.247		20/11/2019 06:25	1.73	0.301
20/11/2019 03:19	1.67	0.0597		20/11/2019 03:51	1.71	NaN						20/11/2019 04:45	1.7	0.208		20/11/2019 05:12	1.8	0.412		20/11/2019 05:38	1.78	0.379		20/11/2019 06:00	1.73	0.287		20/11/2019 06:25	1.75	0.342
20/11/2019 03:19	1.68	0.115		20/11/2019 03:51	1.73	0.175						20/11/2019 04:45	1.71	0.259										20/11/2019 06:00	1.74	0.316		20/11/2019 06:25	1.77	0.363
20/11/2019 03:19	1.7	0.17		20/11/2019 03:51	1.74	0.308						20/11/2019 04:45	1.73	0.293										20/11/2019 06:00	1.76	0.365		20/11/2019 06:25	1.78	0.399
20/11/2019 03:19	1.71	0.217		20/11/2019 03:51	1.76	0.35						20/11/2019 04:45	1.75	0.342										20/11/2019 06:00	1.77	0.382		20/11/2019 06:25	1.8	0.426
20/11/2019 03:19	1.73	0.253		20/11/2019 03:51	1.78	0.349						20/11/2019 04:45	1.76	0.362														20/11/2019 06:25	1.82	0.468
20/11/2019 03:20	1.74	0.29		20/11/2019 03:52	1.79	0.362						20/11/2019 04:46	1.78	0.399														20/11/2019 06:26	1.83	0.48
				20/11/2019 03:52	1.81	0.374
				20/11/2019 03:52	1.82	0.38
