# Supplementary material for: Synergistic HNO3–H2SO4–NH3 upper tropospheric particle formation
Source: Nature. 2022 May 18;605(7910):483–9. doi: 10.1038/s41586-022-04605-4 (PMC9117139; doi:10.1038/s41586-022-04605-4)
Supplement: Supplementary file 10 — Source Data Extended Data Fig. 5 [file 41586_2022_4605_MOESM10_ESM.xlsx]

## Sheet: a
H2SO4 conc. (cm^-3)	J_1.7_H2SO4 (cm^-3 s^-1)
459000	1.74514
773000	5.45174
955000	8.00526
1100000	8.35904
1410000	43.7434
1620000	138.889
1810000	204.501
1990000	213.683
2380000	242.333
2390000	304.088
2770000	349.59
2310000	349.59
2690000	347.606

## Sheet: b
HNO3 conc. (cm^-3)	J_1.7_HNO3 (cm^-3 s^-1)
225650000	18.2199
364190000	30.2692
421766000	41.8509
567404000	53.4137
750917000	78.8755
889862000	116.983
1020470000	148.803
1101260000	171.935
1316010000	203.736
1334260000	245.602
1630310000	277.512
1429760000	295.605
1656160000	311.905
1570610000	334.242
1593960000	354.959
1683970000	376.927

## Sheet: c
NH3 conc. (cm^-3)	J_1.7_NH3 (cm^-3 s^-1)
174530000	11.3627
242920000	41.1575
301190000	61.6605
350780000	64.4071
393030000	98.1614
429030000	184.375
459730000	244.813
485930000	252.058

## Sheet: d
[H2SO4]^3*[HNO3]^2*[NH3]^4 (cm^-27)	J_1.7_H2SO4 (cm^-3 s^-1)		[H2SO4]^3*[HNO3]^2*[NH3]^4 (cm^-27)	J_1.7_HNO3 (cm^-3 s^-1)		[H2SO4]^3*[HNO3]^2*[NH3]^4 (cm^-27)	J_1.7_NH3 (cm^-3 s^-1)
4.11715e+70	1.74514		3.39344e+71	18.2199		8.13885e+71	11.3627
1.91749e+71	5.45174		1.47644e+72	30.2692		1.31126e+72	41.1575
3.99594e+71	8.00526		1.45393e+72	41.8509		3.1342e+72	61.6605
6.8424e+71	8.35904		2.03808e+72	53.4137		7.17853e+72	64.4071
1.42651e+72	43.7434		3.05781e+72	78.8755		5.82276e+72	98.1614
1.99685e+72	138.889		2.61338e+72	116.983		1.04979e+73	184.375
3.08663e+72	204.501		3.36334e+72	148.803		8.33568e+72	244.813
3.76459e+72	213.683		8.47939e+72	171.935		2.62809e+72	252.058
6.7007e+72	242.333		1.0906e+73	203.736
7.62918e+72	304.088		6.8765e+72	245.602
1.10725e+73	349.59		1.1044e+73	277.512
6.30004e+72	349.59		6.08338e+72	295.605
9.65645e+72	347.606		7.96676e+72	311.905
			6.66387e+72	334.242
			8.9916e+72	354.959
			1.1389e+73	376.927

## Sheet: e
Temperature (K)	J_1.7_meas (cm^-3 s^-1)	J_1.7_kinetic (cm^-3 s^-1)
268	0.00872	668521000
267	0.0106	667272000
266	0.0129	666021000
265	0.0157	664768000
264	0.0191	663513000
263	0.0234	662255000
262	0.0286	660995000
261	0.035	659732000
260	0.043	658467000
259	0.0528	657200000
258	0.0651	655930000
257	0.0802	654657000
256	0.0991	653382000
255	0.123	652105000
254	0.152	650825000
253	0.189	649543000
252	0.235	648258000
251	0.292	646970000
250	0.365	645680000
249	0.456	644387000
248	0.571	643092000
247	0.717	641794000
246	0.901	640494000
245	1.13	639191000
244	1.43	637885000
243	1.81	636576000
242	2.29	635265000
241	2.91	633951000
240	3.7	632635000
239	4.71	631315000
238	6.02	629993000
237	7.7	628668000
236	9.88	627341000
235	12.7	626010000
234	16.3	624677000
233	21.1	623341000
232	27.3	622001000
231	35.3	620659000
230	45.9	619315000
229	59.8	617967000
228	78	616616000
227	102	615262000
226	134	613906000
225	176	612546000
224	232	611183000
223	306	609817000
222	405	608449000
221	538	607077000
220	716	605702000
219	955	604323000
218	1280	602942000
217	1710	601558000
216	2310	600170000
215	3110	598779000
214	4210	597385000
213	5710	595988000
212	7770	594587000
211	10600	593183000
210	14500	591776000
209	19900	590365000
208	27400	588951000
207	37900	587533000
206	52400	586113000
205	72900	584688000
204	102000	583260000
203	142000	581829000
202	200000	580394000
201	281000	578956000
200	397000	577514000
199	563000	576068000
198	801000	574619000
