# Supplementary material for: Synergistic HNO3–H2SO4–NH3 upper tropospheric particle formation
Source: Nature. 2022 May 18;605(7910):483–9. doi: 10.1038/s41586-022-04605-4 (PMC9117139; doi:10.1038/s41586-022-04605-4)
Supplement: Supplementary file 11 — Source Data Extended Data Fig. 8 [file 41586_2022_4605_MOESM11_ESM.xlsx]

## Sheet: b
Time (s)	Hydrometeor_water (g m^-3)	Hydrometeor_ice (g m^-3)	Altitude (m)
0	0	0	1000.03
0.873417	0	0	1000.04
1.74683	0	0	1000.05
2.62025	0	0	1000.06
3.49367	0	0	1000.09
4.36709	0	0	1000.13
5.2405	0	0	1000.16
6.11392	0	0	1000.19
6.98734	0	0	1000.22
7.86076	0	0	1000.26
8.73417	0	0	1000.29
9.60759	0	0	1000.32
10.481	0	0	1000.36
11.3544	0	0	1000.4
12.2278	0	0	1000.43
13.1013	0	0	1000.47
13.9747	0	0	1000.51
14.8481	0	0	1000.55
15.7215	0	0	1000.59
16.5949	0	0	1000.63
17.4683	0	0	1000.67
18.3418	0	0	1000.71
19.2152	0	0	1000.75
20.0886	0	0	1000.8
20.962	0	0	1000.84
21.8354	0	0	1000.88
22.7089	0	0	1000.93
23.5823	0	0	1000.97
24.4557	0	0	1001.02
25.3291	0	0	1001.07
26.2025	0	0	1001.11
27.0759	0	0	1001.16
27.9494	0	0	1001.21
28.8228	0	0	1001.26
29.6962	0	0	1001.31
30.5696	0	0	1001.36
31.443	0	0	1001.42
32.3164	0	0	1001.47
33.1899	0	0	1001.52
34.0633	0	0	1001.58
34.9367	0	0	1001.63
35.8101	0	0	1001.69
36.6835	0	0	1001.74
37.5569	0	0	1001.8
38.4304	0	0	1001.86
39.3038	0	0	1001.92
40.1772	0	0	1001.98
41.0506	0	0	1002.04
41.924	0	0	1002.1
42.7974	0	0	1002.16
43.6709	0	0	1002.22
44.5443	0	0	1002.29
45.4177	0	0	1002.35
46.2911	0	0	1002.42
47.1645	0	0	1002.48
48.038	0	0	1002.55
48.9114	0	0	1002.62
49.7848	0	0	1002.69
50.6582	0	0	1002.76
51.5316	0	0	1002.83
52.405	0	0	1002.9
53.2785	0	0	1002.97
54.1519	0	0	1003.05
55.0253	0	0	1003.12
55.8987	0	0	1003.2
56.7721	0	0	1003.27
57.6455	0	0	1003.35
58.519	0	0	1003.43
59.3924	0	0	1003.51
60.2658	0	0	1003.59
61.1392	0	0	1003.67
62.0126	0	0	1003.75
62.886	0	0	1003.84
63.7595	0	0	1003.92
64.6329	0	0	1004.01
65.5063	0	0	1004.1
66.3797	0	0	1004.18
67.2531	0	0	1004.27
68.1266	0	0	1004.37
69	0	0	1004.46
69.8734	0	0	1004.55
70.7468	0	0	1004.65
71.6202	0	0	1004.74
72.4936	0	0	1004.84
73.3671	0	0	1004.94
74.2405	0	0	1005.04
75.1139	0	0	1005.14
75.9873	0	0	1005.24
76.8607	0	0	1005.34
77.7341	0	0	1005.45
78.6076	0	0	1005.55
79.481	0	0	1005.66
80.3544	0	0	1005.77
81.2278	0	0	1005.88
82.1012	0	0	1005.99
82.9746	0	0	1006.1
83.8481	0	0	1006.22
84.7215	0	0	1006.33
85.5949	0	0	1006.45
86.4683	0	0	1006.57
87.3417	0	0	1006.68
88.2152	0	0	1006.8
89.0886	0	0	1006.93
89.962	0	0	1007.05
90.8354	0	0	1007.17
91.7088	0	0	1007.3
92.5822	0	0	1007.42
93.4557	0	0	1007.55
94.3291	0	0	1007.68
95.2025	0	0	1007.81
96.0759	0	0	1007.94
96.9493	0	0	1008.08
97.8227	0	0	1008.21
98.6962	0	0	1008.34
99.5696	0	0	1008.48
100.443	0	0	1008.62
101.316	0	0	1008.76
102.19	0	0	1008.89
103.063	0	0	1009.03
103.937	0	0	1009.18
104.81	0	0	1009.32
105.683	0	0	1009.46
106.557	0	0	1009.61
107.43	0	0	1009.75
108.304	0	0	1009.9
109.177	0	0	1010.04
110.051	0	0	1010.19
110.924	0	0	1010.34
111.797	0	0	1010.49
112.671	0	0	1010.64
113.544	0	0	1010.79
114.418	0	0	1010.94
115.291	0	0	1011.1
116.165	0	0	1011.25
117.038	0	0	1011.41
117.911	0	0	1011.56
118.785	0	0	1011.72
119.658	0	0	1011.87
120.532	0	0	1012.03
121.405	0	0	1012.19
122.278	0	0	1012.35
123.152	0	0	1012.51
124.025	0	0	1012.67
124.899	0	0	1012.83
125.772	0	0	1012.99
126.646	0	0	1013.15
127.519	0	0	1013.32
128.392	0	0	1013.48
129.266	0	0	1013.64
130.139	0	0	1013.81
131.013	0	0	1013.97
131.886	0	0	1014.14
132.759	0	0	1014.31
133.633	0	0	1014.48
134.506	0	0	1014.64
135.38	0	0	1014.81
136.253	0	0	1014.98
137.127	0	0	1015.15
138	0	0	1015.32
138.873	0	0	1015.5
139.747	0	0	1015.67
140.62	0	0	1015.84
141.494	0	0	1016.02
142.367	0	0	1016.19
143.24	0	0	1016.37
144.114	0	0	1016.54
144.987	0	0	1016.72
145.861	0	0	1016.9
146.734	0	0	1017.08
147.608	0	0	1017.26
148.481	0	0	1017.44
149.354	0	0	1017.62
150.228	0	0	1017.8
151.101	0	0	1017.98
151.975	0	0	1018.17
152.848	0	0	1018.35
153.721	0	0	1018.54
154.595	0	0	1018.72
155.468	0	0	1018.91
156.342	0	0	1019.1
157.215	0	0	1019.29
158.089	0	0	1019.48
158.962	0	0	1019.67
159.835	0	0	1019.86
160.709	0	0	1020.05
161.582	0	0	1020.24
162.456	0	0	1020.44
163.329	0	0	1020.63
164.202	0	0	1020.83
165.076	0	0	1021.03
165.949	0	0	1021.23
166.823	0	0	1021.43
167.696	0	0	1021.63
168.57	0	0	1021.83
169.443	0	0	1022.03
170.316	0	0	1022.23
171.19	0	0	1022.44
172.063	0	0	1022.64
172.937	0	0	1022.85
173.81	0	0	1023.06
174.683	0	0	1023.27
175.557	0	0	1023.48
176.43	0	0	1023.69
177.304	0	0	1023.9
178.177	0	0	1024.11
179.051	0	0	1024.33
179.924	0	0	1024.55
180.797	0	0	1024.76
181.671	0	0	1024.98
182.544	0	0	1025.2
183.418	0	0	1025.42
184.291	0	0	1025.64
185.164	0	0	1025.86
186.038	0	0	1026.09
186.911	0	0	1026.31
187.785	0	0	1026.54
188.658	0	0	1026.77
189.532	0	0	1027
190.405	0	0	1027.23
191.278	0	0	1027.46
192.152	0	0	1027.69
193.025	0	0	1027.92
193.899	0	0	1028.16
194.772	0	0	1028.39
195.645	0	0	1028.63
196.519	0	0	1028.87
197.392	0	0	1029.11
198.266	0	0	1029.35
199.139	0	0	1029.59
200.013	0	0	1029.83
200.886	0	0	1030.08
201.759	0	0	1030.32
202.633	0	0	1030.57
203.506	0	0	1030.82
204.38	0	0	1031.07
205.253	0	0	1031.32
206.126	0	0	1031.57
207	0	0	1031.82
207.873	0	0	1032.07
208.747	0	0	1032.33
209.62	0	0	1032.58
210.494	0	0	1032.84
211.367	0	0	1033.1
212.24	0	0	1033.36
213.114	0	0	1033.61
213.987	0	0	1033.88
214.861	0	0	1034.14
215.734	0	0	1034.4
216.607	0	0	1034.66
217.481	0	0	1034.93
218.354	0	0	1035.2
219.228	0	0	1035.46
220.101	0	0	1035.73
220.975	0	0	1036
221.848	0	0	1036.27
222.721	0	0	1036.54
223.595	0	0	1036.81
224.468	0	0	1037.09
225.342	0	0	1037.36
226.215	0	0	1037.64
227.089	0	0	1037.91
227.962	0	0	1038.19
228.835	0	0	1038.47
229.709	0	0	1038.75
230.582	0	0	1039.03
231.456	0	0	1039.31
232.329	0	0	1039.59
233.202	0	0	1039.87
234.076	0	0	1040.16
234.949	0	0	1040.44
235.823	0	0	1040.73
236.696	0	0	1041.01
237.57	0	0	1041.3
238.443	0	0	1041.59
239.316	0	0	1041.88
240.19	0	0	1042.17
241.063	0	0	1042.46
241.937	0	0	1042.75
242.81	0	0	1043.04
243.683	0	0	1043.34
244.557	0	0	1043.63
245.43	0	0	1043.93
246.304	0	0	1044.22
247.177	0	0	1044.52
248.051	0	0	1044.82
248.924	0	0	1045.12
249.797	0	0	1045.42
250.671	0	0	1045.72
251.544	0	0	1046.02
252.418	0	0	1046.32
253.291	0	0	1046.63
254.164	0	0	1046.93
255.038	0	0	1047.24
255.911	0	0	1047.54
256.785	0	0	1047.85
257.658	0	0	1048.16
258.532	0	0	1048.47
259.405	0	0	1048.78
260.278	0	0	1049.09
261.152	0	0	1049.4
262.025	0	0	1049.72
262.899	0	0	1050.03
263.772	0	0	1050.35
264.645	0	0	1050.66
265.519	0	0	1050.98
266.392	0	0	1051.3
267.266	0	0	1051.62
268.139	0	0	1051.94
269.013	0	0	1052.26
269.886	0	0	1052.58
270.759	0	0	1052.9
271.633	0	0	1053.23
272.506	0	0	1053.55
273.38	0	0	1053.88
274.253	0	0	1054.21
275.126	0	0	1054.53
276	0	0	1054.86
276.873	0	0	1055.19
277.747	0	0	1055.53
278.62	0	0	1055.86
279.494	0	0	1056.19
280.367	0	0	1056.53
281.24	0	0	1056.86
282.114	0	0	1057.2
282.987	0	0	1057.54
283.861	0	0	1057.88
284.734	0	0	1058.21
285.607	0	0	1058.56
286.481	0	0	1058.9
287.354	0	0	1059.24
288.228	0	0	1059.58
289.101	0	0	1059.93
289.975	0	0	1060.28
290.848	0	0	1060.62
291.721	0	0	1060.97
292.595	0	0	1061.32
293.468	0	0	1061.67
294.342	0	0	1062.02
295.215	0	0	1062.38
296.088	0	0	1062.73
296.962	0	0	1063.08
297.835	0	0	1063.44
298.709	0	0	1063.8
299.582	0	0	1064.15
300.456	0	0	1064.51
301.329	0	0	1064.87
302.202	0	0	1065.23
303.076	0	0	1065.59
303.949	0	0	1065.96
304.823	0	0	1066.32
305.696	0	0	1066.69
306.569	0	0	1067.05
307.443	0	0	1067.42
308.316	0	0	1067.79
309.19	0	0	1068.16
310.063	0	0	1068.53
310.937	0	0	1068.9
311.81	0	0	1069.27
312.683	0	0	1069.64
313.557	0	0	1070.02
314.43	0	0	1070.39
315.304	0	0	1070.77
316.177	0	0	1071.15
317.05	0	0	1071.52
317.924	0	0	1071.9
318.797	0	0	1072.28
319.671	0	0	1072.66
320.544	0	0	1073.05
321.418	0	0	1073.43
322.291	0	0	1073.81
323.164	0	0	1074.2
324.038	0	0	1074.58
324.911	0	0	1074.97
325.785	0	0	1075.36
326.658	0	0	1075.74
327.532	0	0	1076.13
328.405	0	0	1076.52
329.278	0	0	1076.91
330.152	0	0	1077.31
331.025	0	0	1077.7
331.899	0	0	1078.09
332.772	0	0	1078.49
333.645	0	0	1078.88
334.519	0	0	1079.28
335.392	0	0	1079.68
336.266	0	0	1080.07
337.139	0	0	1080.47
338.013	0	0	1080.87
338.886	0	0	1081.27
339.759	0	0	1081.67
340.633	0	0	1082.08
341.506	0	0	1082.48
342.38	0	0	1082.88
343.253	0	0	1083.29
344.126	0	0	1083.69
345	0	0	1084.1
345.873	0	0	1084.51
346.747	0	0	1084.91
347.62	0	0	1085.32
348.494	0	0	1085.73
349.367	0	0	1086.14
350.24	0	0	1086.55
351.114	0	0	1086.96
351.987	0	0	1087.38
352.861	0	0	1087.79
353.734	0	0	1088.2
354.607	0	0	1088.62
355.481	0	0	1089.03
356.354	0	0	1089.45
357.228	0	0	1089.87
358.101	0	0	1090.29
358.975	0	0	1090.7
359.848	0	0	1091.12
360.721	0	0	1091.54
361.595	0	0	1091.96
362.468	0	0	1092.39
363.342	0	0	1092.81
364.215	0	0	1093.23
365.088	0	0	1093.66
365.962	0	0	1094.08
366.835	0	0	1094.51
367.709	0	0	1094.93
368.582	0	0	1095.36
369.456	0	0	1095.79
370.329	0	0	1096.21
371.202	0	0	1096.64
372.076	0	0	1097.07
372.949	0	0	1097.5
373.823	0	0	1097.93
374.696	0	0	1098.36
375.569	0	0	1098.8
376.443	0	0	1099.23
377.316	0	0	1099.66
378.19	0	0	1100.1
379.063	0	0	1100.53
379.937	0	0	1100.97
380.81	0	0	1101.41
381.683	0	0	1101.84
382.557	0	0	1102.28
383.43	0	0	1102.72
384.304	0	0	1103.16
385.177	0	0	1103.6
386.05	0	0	1104.04
386.924	0	0	1104.48
387.797	0	0	1104.92
388.671	0	0	1105.36
389.544	0	0	1105.8
390.418	0	0	1106.25
391.291	0	0	1106.69
392.164	0	0	1107.14
393.038	0	0	1107.58
393.911	0	0	1108.03
394.785	0	0	1108.47
395.658	0	0	1108.92
396.531	0	0	1109.37
397.405	0	0	1109.82
398.278	0	0	1110.27
399.152	0	0	1110.71
400.025	0	0	1111.16
400.899	0	0	1111.61
401.772	0	0	1112.07
402.645	0	0	1112.52
403.519	0	0	1112.97
404.392	0	0	1113.42
405.266	0	0	1113.88
406.139	0	0	1114.33
407.012	0	0	1114.78
407.886	0	0	1115.24
408.759	0	0	1115.69
409.633	0	0	1116.15
410.506	0	0	1116.61
411.38	0	0	1117.06
412.253	0	0	1117.52
413.126	0	0	1117.98
414	0	0	1118.44
414.873	0	0	1118.9
415.747	0	0	1119.36
416.62	0	0	1119.82
417.493	0	0	1120.28
418.367	0	0	1120.74
419.24	0	0	1121.2
420.114	0	0	1121.66
420.987	0	0	1122.12
421.861	0	0	1122.59
422.734	0	0	1123.05
423.607	0	0	1123.51
424.481	0	0	1123.98
425.354	0	0	1124.44
426.228	0	0	1124.91
427.101	0	0	1125.37
427.974	0	0	1125.84
428.848	0	0	1126.31
429.721	0	0	1126.77
430.595	0	0	1127.24
431.468	0	0	1127.71
432.342	0	0	1128.18
433.215	0	0	1128.65
434.088	0	0	1129.12
434.962	0	0	1129.59
435.835	0	0	1130.06
436.709	0	0	1130.53
437.582	0	0	1131
438.456	0	0	1131.47
439.329	0	0	1131.94
440.202	0	0	1132.41
441.076	0	0	1132.88
441.949	0	0	1133.36
442.823	0	0	1133.83
443.696	0	0	1134.3
444.569	0	0	1134.78
445.443	0	0	1135.25
446.316	0	0	1135.73
447.19	0	0	1136.2
448.063	0	0	1136.68
448.937	0	0	1137.15
449.81	0	0	1137.63
450.683	0	0	1138.11
451.557	0	0	1138.58
452.43	0	0	1139.06
453.304	0	0	1139.54
454.177	0	0	1140.02
455.05	0	0	1140.5
455.924	0	0	1140.97
456.797	0	0	1141.45
457.671	4.64553e-06	0	1141.93
458.544	3.79298e-05	0	1142.41
459.418	8.81799e-05	0	1142.89
460.291	0.000141466	0	1143.37
461.164	0.000197906	0	1143.85
462.038	0.000257622	0	1144.34
462.911	0.000321059	0	1144.82
463.785	0.000388301	0	1145.3
464.658	0.000459199	0	1145.78
465.531	0.000533854	0	1146.27
466.405	0.000612365	0	1146.75
467.278	0.000694822	0	1147.23
468.152	0.000781316	0	1147.72
469.025	0.000871944	0	1148.2
469.899	0.000967293	0	1148.68
470.772	0.00106729	0	1149.17
471.645	0.0011718	0	1149.66
472.519	0.00128093	0	1150.14
473.392	0.0013948	0	1150.63
474.266	0.00151348	0	1151.11
475.139	0.00163704	0	1151.6
476.012	0.00176547	0	1152.09
476.886	0.00189945	0	1152.58
477.759	0.00203861	0	1153.06
478.633	0.00218281	0	1153.55
479.506	0.00233211	0	1154.04
480.38	0.00248654	0	1154.53
481.253	0.00264614	0	1155.02
482.126	0.00281094	0	1155.51
483	0.00298098	0	1156
483.873	0.00315712	0	1156.49
484.747	0.00333869	0	1156.98
485.62	0.00352562	0	1157.47
486.493	0.00371795	0	1157.96
487.367	0.00391568	0	1158.45
488.24	0.00411878	0	1158.94
489.114	0.00432726	0	1159.43
489.987	0.00454113	0	1159.92
490.861	0.00476122	0	1160.42
491.734	0.00498667	0	1160.91
492.607	0.00521747	0	1161.4
493.481	0.00545362	0	1161.89
494.354	0.00569509	0	1162.39
495.228	0.00594188	0	1162.88
496.101	0.00619397	0	1163.37
496.974	0.00645152	0	1163.87
497.848	0.00671506	0	1164.36
498.721	0.00698387	0	1164.86
499.595	0.00725796	0	1165.35
500.468	0.00753733	0	1165.85
501.342	0.00782198	0	1166.34
502.215	0.00811187	0	1166.84
503.088	0.008407	0	1167.33
503.962	0.00870762	0	1167.83
504.835	0.009014	0	1168.32
505.709	0.00932552	0	1168.82
506.582	0.00964216	0	1169.31
507.455	0.00996391	0	1169.81
508.329	0.0102907	0	1170.31
509.202	0.0106226	0	1170.8
510.076	0.0109596	0	1171.3
510.949	0.0113019	0	1171.8
511.823	0.0116497	0	1172.3
512.696	0.0120025	0	1172.79
513.569	0.0123603	0	1173.29
514.443	0.0127229	0	1173.79
515.316	0.0130904	0	1174.29
516.19	0.0134627	0	1174.78
517.063	0.0138397	0	1175.28
517.936	0.014222	0	1175.78
518.81	0.0146093	0	1176.28
519.683	0.0150012	0	1176.78
520.557	0.0153977	0	1177.27
521.43	0.0157988	0	1177.77
522.304	0.0162043	0	1178.27
523.177	0.0166144	0	1178.77
524.05	0.0170288	0	1179.27
524.924	0.0174481	0	1179.77
525.797	0.017872	0	1180.27
526.671	0.0183003	0	1180.77
527.544	0.0187328	0	1181.26
528.417	0.0191696	0	1181.76
529.291	0.0196106	0	1182.26
530.164	0.0200557	0	1182.76
531.038	0.0205049	0	1183.26
531.911	0.0209586	0	1183.76
532.785	0.0214163	0	1184.26
533.658	0.0218778	0	1184.76
534.531	0.0223431	0	1185.26
535.405	0.022812	0	1185.76
536.278	0.0232846	0	1186.26
537.152	0.0237606	0	1186.76
538.025	0.0242402	0	1187.26
538.898	0.0247237	0	1187.76
539.772	0.0252107	0	1188.26
540.645	0.025701	0	1188.76
541.519	0.0261946	0	1189.26
542.392	0.0266914	0	1189.76
543.266	0.0271914	0	1190.26
544.139	0.0276943	0	1190.76
545.012	0.0282002	0	1191.26
545.886	0.0287095	0	1191.76
546.759	0.0292216	0	1192.26
547.633	0.0297364	0	1192.76
548.506	0.030254	0	1193.26
549.38	0.0307743	0	1193.76
550.253	0.0312973	0	1194.26
551.126	0.0318228	0	1194.76
552	0.0323508	0	1195.26
552.873	0.0328817	0	1195.76
553.747	0.033415	0	1196.26
554.62	0.0339506	0	1196.76
555.493	0.0344885	0	1197.25
556.367	0.0350287	0	1197.75
557.24	0.0355711	0	1198.25
558.114	0.0361157	0	1198.75
558.987	0.0366624	0	1199.25
559.861	0.0372115	0	1199.75
560.734	0.0377627	0	1200.25
561.607	0.0383158	0	1200.75
562.481	0.0388708	0	1201.25
563.354	0.0394276	0	1201.75
564.228	0.0399864	0	1202.25
565.101	0.0405469	0	1202.75
565.974	0.0411093	0	1203.25
566.848	0.0416737	0	1203.75
567.721	0.0422398	0	1204.25
568.595	0.0428076	0	1204.75
569.468	0.0433772	0	1205.26
570.342	0.0439484	0	1205.76
571.215	0.0445213	0	1206.26
572.088	0.0450959	0	1206.76
572.962	0.0456721	0	1207.26
573.835	0.0462502	0	1207.76
574.709	0.0468299	0	1208.26
575.582	0.0474113	0	1208.76
576.455	0.0479942	0	1209.26
577.329	0.0485788	0	1209.76
578.202	0.0491651	0	1210.26
579.076	0.0497529	0	1210.76
579.949	0.0503426	0	1211.26
580.823	0.0509341	0	1211.76
581.696	0.0515273	0	1212.26
582.569	0.0521221	0	1212.76
583.443	0.0527185	0	1213.26
584.316	0.0533164	0	1213.76
585.19	0.0539159	0	1214.26
586.063	0.054517	0	1214.76
586.936	0.0551198	0	1215.26
587.81	0.0557243	0	1215.76
588.683	0.0563304	0	1216.26
589.557	0.056938	0	1216.76
590.43	0.0575472	0	1217.26
591.304	0.058158	0	1217.76
592.177	0.0587703	0	1218.27
593.05	0.0593841	0	1218.77
593.924	0.0599998	0	1219.27
594.797	0.0606171	0	1219.77
595.671	0.0612359	0	1220.27
596.544	0.0618564	0	1220.77
597.417	0.0624785	0	1221.27
598.291	0.0631022	0	1221.77
599.164	0.0637275	0	1222.27
600.038	0.0643543	0	1222.77
600.911	0.064983	0	1223.28
601.785	0.0656133	0	1223.78
602.658	0.0662452	0	1224.28
603.531	0.0668788	0	1224.78
604.405	0.067514	0	1225.28
605.278	0.068151	0	1225.78
606.152	0.0687896	0	1226.29
607.025	0.0694298	0	1226.79
607.898	0.0700721	0	1227.29
608.772	0.0707161	0	1227.79
609.645	0.0713619	0	1228.29
610.519	0.0720095	0	1228.79
611.392	0.0726588	0	1229.3
612.266	0.07331	0	1229.8
613.139	0.073963	0	1230.3
614.012	0.0746179	0	1230.8
614.886	0.0752751	0	1231.3
615.759	0.0759343	0	1231.81
616.633	0.0765954	0	1232.31
617.506	0.0772584	0	1232.81
618.379	0.0779235	0	1233.31
619.253	0.0785905	0	1233.81
620.126	0.0792595	0	1234.32
621	0.0799304	0	1234.82
621.873	0.0806037	0	1235.32
622.747	0.081279	0	1235.82
623.62	0.0819562	0	1236.33
624.493	0.0826354	0	1236.83
625.367	0.0833165	0	1237.33
626.24	0.0839995	0	1237.84
627.114	0.0846844	0	1238.34
627.987	0.0853713	0	1238.84
628.86	0.0860603	0	1239.34
629.734	0.086751	0	1239.85
630.607	0.0874434	0	1240.35
631.481	0.0881375	0	1240.85
632.354	0.0888334	0	1241.36
633.228	0.089531	0	1241.86
634.101	0.0902303	0	1242.37
634.974	0.0909314	0	1242.87
635.848	0.0916345	0	1243.37
636.721	0.0923393	0	1243.88
637.595	0.0930458	0	1244.38
638.468	0.093754	0	1244.88
639.341	0.0944639	0	1245.39
640.215	0.0951756	0	1245.89
641.088	0.0958889	0	1246.4
641.962	0.0966042	0	1246.9
642.835	0.0973214	0	1247.4
643.709	0.0980404	0	1247.91
644.582	0.0987611	0	1248.41
645.455	0.0994837	0	1248.92
646.329	0.100208	0	1249.42
647.202	0.100934	0	1249.93
648.076	0.101662	0	1250.43
648.949	0.102392	0	1250.94
649.822	0.103124	0	1251.44
650.696	0.103858	0	1251.95
651.569	0.104593	0	1252.45
652.443	0.105331	0	1252.96
653.316	0.106071	0	1253.46
654.19	0.106812	0	1253.97
655.063	0.107555	0	1254.47
655.936	0.108301	0	1254.98
656.81	0.109048	0	1255.48
657.683	0.109797	0	1255.99
658.557	0.110548	0	1256.5
659.43	0.111301	0	1257
660.304	0.112055	0	1257.51
661.177	0.112811	0	1258.01
662.05	0.113569	0	1258.52
662.924	0.114328	0	1259.03
663.797	0.115089	0	1259.53
664.671	0.115852	0	1260.04
665.544	0.116616	0	1260.55
666.417	0.117382	0	1261.06
667.291	0.118149	0	1261.56
668.164	0.118917	0	1262.07
669.038	0.119687	0	1262.58
669.911	0.120459	0	1263.09
670.785	0.121232	0	1263.59
671.658	0.122008	0	1264.1
672.531	0.122784	0	1264.61
673.405	0.123563	0	1265.12
674.278	0.124343	0	1265.63
675.152	0.125125	0	1266.14
676.025	0.125909	0	1266.65
676.898	0.126695	0	1267.16
677.772	0.127482	0	1267.67
678.645	0.128271	0	1268.17
679.519	0.129063	0	1268.68
680.392	0.129856	0	1269.19
681.266	0.13065	0	1269.7
682.139	0.131447	0	1270.22
683.012	0.132245	0	1270.73
683.886	0.133045	0	1271.24
684.759	0.133846	0	1271.75
685.633	0.134649	0	1272.26
686.506	0.135454	0	1272.77
687.379	0.13626	0	1273.28
688.253	0.137068	0	1273.79
689.126	0.137877	0	1274.31
690	0.138688	0	1274.82
690.873	0.139501	0	1275.33
691.747	0.140315	0	1275.84
692.62	0.141131	0	1276.36
693.493	0.141949	0	1276.87
694.367	0.142768	0	1277.38
695.24	0.143589	0	1277.9
696.114	0.144411	0	1278.41
696.987	0.145235	0	1278.93
697.86	0.146061	0	1279.44
698.734	0.146889	0	1279.95
699.607	0.147718	0	1280.47
700.481	0.148548	0	1280.98
701.354	0.149381	0	1281.5
702.228	0.150215	0	1282.02
703.101	0.15105	0	1282.53
703.974	0.151887	0	1283.05
704.848	0.152726	0	1283.56
705.721	0.153566	0	1284.08
706.595	0.154408	0	1284.6
707.468	0.155251	0	1285.12
708.341	0.156096	0	1285.63
709.215	0.156942	0	1286.15
710.088	0.15779	0	1286.67
710.962	0.158639	0	1287.19
711.835	0.15949	0	1287.71
712.709	0.160343	0	1288.23
713.582	0.161198	0	1288.74
714.455	0.162055	0	1289.26
715.329	0.162914	0	1289.78
716.202	0.163774	0	1290.3
717.076	0.164637	0	1290.82
717.949	0.165501	0	1291.35
718.822	0.166366	0	1291.87
719.696	0.167234	0	1292.39
720.569	0.168103	0	1292.91
721.443	0.168974	0	1293.43
722.316	0.169846	0	1293.95
723.19	0.170721	0	1294.48
724.063	0.171596	0	1295
724.936	0.172474	0	1295.52
725.81	0.173354	0	1296.05
726.683	0.174235	0	1296.57
727.557	0.175117	0	1297.1
728.43	0.176002	0	1297.62
729.303	0.176887	0	1298.15
730.177	0.177775	0	1298.67
731.05	0.178664	0	1299.2
731.924	0.179555	0	1299.72
732.797	0.180447	0	1300.25
733.671	0.181341	0	1300.78
734.544	0.182237	0	1301.3
735.417	0.183134	0	1301.83
736.291	0.184033	0	1302.36
737.164	0.184933	0	1302.89
738.038	0.185835	0	1303.41
738.911	0.186738	0	1303.94
739.784	0.187643	0	1304.47
740.658	0.18855	0	1305
741.531	0.189458	0	1305.53
742.405	0.190368	0	1306.06
743.278	0.191279	0	1306.59
744.152	0.192192	0	1307.12
745.025	0.193106	0	1307.66
745.898	0.194022	0	1308.19
746.772	0.194939	0	1308.72
747.645	0.195858	0	1309.25
748.519	0.196779	0	1309.79
749.392	0.197701	0	1310.32
750.265	0.198625	0	1310.85
751.139	0.19955	0	1311.39
752.012	0.200476	0	1311.92
752.886	0.201405	0	1312.46
753.759	0.202335	0	1312.99
754.633	0.203266	0	1313.53
755.506	0.204199	0	1314.07
756.379	0.205134	0	1314.6
757.253	0.20607	0	1315.14
758.126	0.207008	0	1315.68
759	0.207947	0	1316.22
759.873	0.208888	0	1316.75
760.747	0.209831	0	1317.29
761.62	0.210775	0	1317.83
762.493	0.21172	0	1318.37
763.367	0.212667	0	1318.92
764.24	0.213616	0	1319.46
765.114	0.214566	0	1320
765.987	0.215518	0	1320.54
766.86	0.216471	0	1321.08
767.734	0.217426	0	1321.63
768.607	0.218383	0	1322.17
769.481	0.219341	0	1322.72
770.354	0.2203	0	1323.26
771.228	0.221261	0	1323.81
772.101	0.222224	0	1324.36
772.974	0.223188	0	1324.9
773.848	0.224154	0	1325.45
774.721	0.225121	0	1326
775.595	0.22609	0	1326.55
776.468	0.22706	0	1327.1
777.341	0.228032	0	1327.65
778.215	0.229005	0	1328.2
779.088	0.229981	0	1328.75
779.962	0.230957	0	1329.3
780.835	0.231936	0	1329.85
781.709	0.232915	0	1330.4
782.582	0.233897	0	1330.96
783.455	0.23488	0	1331.51
784.329	0.235865	0	1332.07
785.202	0.236851	0	1332.62
786.076	0.237839	0	1333.18
786.949	0.238829	0	1333.73
787.822	0.23982	0	1334.29
788.696	0.240813	0	1334.85
789.569	0.241808	0	1335.41
790.443	0.242805	0	1335.97
791.316	0.243804	0	1336.53
792.19	0.244806	0	1337.09
793.063	0.245809	0	1337.65
793.936	0.246815	0	1338.21
794.81	0.247824	0	1338.77
795.683	0.248835	0	1339.34
796.557	0.249848	0	1339.9
797.43	0.250864	0	1340.46
798.303	0.251882	0	1341.03
799.177	0.252902	0	1341.6
800.05	0.253924	0	1342.16
800.924	0.254949	0	1342.73
801.797	0.255977	0	1343.3
802.671	0.257007	0	1343.87
803.544	0.258039	0	1344.44
804.417	0.259073	0	1345.01
805.291	0.26011	0	1345.58
806.164	0.26115	0	1346.15
807.038	0.262191	0	1346.72
807.911	0.263236	0	1347.29
808.784	0.264283	0	1347.87
809.658	0.265333	0	1348.44
810.531	0.266386	0	1349.02
811.405	0.267441	0	1349.59
812.278	0.268498	0	1350.17
813.152	0.269558	0	1350.75
814.025	0.27062	0	1351.33
814.898	0.271685	0	1351.91
815.772	0.272753	0	1352.49
816.645	0.273824	0	1353.07
817.519	0.274896	0	1353.65
818.392	0.275972	0	1354.23
819.265	0.27705	0	1354.81
820.139	0.278131	0	1355.4
821.012	0.279214	0	1355.98
821.886	0.280301	0	1356.57
822.759	0.28139	0	1357.15
823.633	0.282482	0	1357.74
824.506	0.283577	0	1358.33
825.379	0.284675	0	1358.92
826.253	0.285775	0	1359.51
827.126	0.286878	0	1360.1
828	0.287984	0	1360.69
828.873	0.289093	0	1361.28
829.746	0.290205	0	1361.87
830.62	0.29132	0	1362.47
831.493	0.292437	0	1363.06
832.367	0.293558	0	1363.66
833.24	0.294681	0	1364.25
834.114	0.295808	0	1364.85
834.987	0.296937	0	1365.45
835.86	0.29807	0	1366.04
836.734	0.299205	0	1366.64
837.607	0.300344	0	1367.24
838.481	0.301485	0	1367.84
839.354	0.302629	0	1368.45
840.227	0.303777	0	1369.05
841.101	0.304927	0	1369.65
841.974	0.30608	0	1370.26
842.848	0.307237	0	1370.86
843.721	0.308396	0	1371.47
844.595	0.309559	0	1372.07
845.468	0.310724	0	1372.68
846.341	0.311892	0	1373.29
847.215	0.313064	0	1373.9
848.088	0.314238	0	1374.51
848.962	0.315415	0	1375.12
849.835	0.316595	0	1375.74
850.708	0.317778	0	1376.35
851.582	0.318964	0	1376.96
852.455	0.320153	0	1377.58
853.329	0.321345	0	1378.2
854.202	0.322539	0	1378.81
855.076	0.323736	0	1379.43
855.949	0.324936	0	1380.05
856.822	0.326139	0	1380.67
857.696	0.327345	0	1381.29
858.569	0.328554	0	1381.92
859.443	0.329766	0	1382.54
860.316	0.33098	0	1383.16
861.189	0.332197	0	1383.79
862.063	0.333417	0	1384.42
862.936	0.33464	0	1385.04
863.81	0.335867	0	1385.67
864.683	0.337096	0	1386.3
865.557	0.338328	0	1386.94
866.43	0.339564	0	1387.57
867.303	0.340802	0	1388.2
868.177	0.342043	0	1388.84
869.05	0.343287	0	1389.47
869.924	0.344535	0	1390.11
870.797	0.345786	0	1390.75
871.671	0.34704	0	1391.39
872.544	0.348297	0	1392.03
873.417	0.349557	0	1392.67
874.291	0.35082	0	1393.31
875.164	0.352086	0	1393.95
876.038	0.353355	0	1394.6
876.911	0.354628	0	1395.25
877.784	0.355904	0	1395.89
878.658	0.357184	0	1396.54
879.531	0.358467	0	1397.19
880.405	0.359753	0	1397.85
881.278	0.361042	0	1398.5
882.152	0.362335	0	1399.15
883.025	0.363631	0	1399.81
883.898	0.364932	0	1400.46
884.772	0.366236	0	1401.12
885.645	0.367543	0	1401.78
886.519	0.368854	0	1402.44
887.392	0.370169	0	1403.1
888.265	0.371487	0	1403.77
889.139	0.372809	0	1404.43
890.012	0.374134	0	1405.1
890.886	0.375463	0	1405.77
891.759	0.376796	0	1406.43
892.633	0.378132	0	1407.1
893.506	0.379472	0	1407.78
894.379	0.380815	0	1408.45
895.253	0.382162	0	1409.12
896.126	0.383512	0	1409.8
897	0.384866	0	1410.48
897.873	0.386224	0	1411.16
898.746	0.387586	0	1411.84
899.62	0.388951	0	1412.52
900.493	0.39032	0	1413.2
901.367	0.391693	0	1413.89
902.24	0.393069	0	1414.58
903.114	0.394449	0	1415.26
903.987	0.395833	0	1415.95
904.86	0.397222	0	1416.64
905.734	0.398614	0	1417.34
906.607	0.400011	0	1418.03
907.481	0.401412	0	1418.73
908.354	0.402818	0	1419.42
909.227	0.404228	0	1420.12
910.101	0.405642	0	1420.82
910.974	0.407061	0	1421.52
911.848	0.408485	0	1422.23
912.721	0.409914	0	1422.93
913.595	0.411347	0	1423.64
914.468	0.412785	0	1424.35
915.341	0.414228	0	1425.06
916.215	0.415676	0	1425.77
917.088	0.417129	0	1426.48
917.962	0.418588	0	1427.19
918.835	0.420052	0	1427.91
919.708	0.421521	0	1428.63
920.582	0.422996	0	1429.35
921.455	0.424476	0	1430.07
922.329	0.425962	0	1430.79
923.202	0.427453	0	1431.51
924.076	0.42895	0	1432.24
924.949	0.430452	0	1432.97
925.822	0.431961	0	1433.69
926.696	0.433476	0	1434.43
927.569	0.434997	0	1435.16
928.443	0.436523	0	1435.89
929.316	0.438055	0	1436.63
930.189	0.439592	0	1437.36
931.063	0.441135	0	1438.1
931.936	0.442685	0	1438.84
932.81	0.444241	0	1439.59
933.683	0.445803	0	1440.33
934.557	0.44737	0	1441.07
935.43	0.448944	0	1441.82
936.303	0.450523	0	1442.57
937.177	0.452109	0	1443.32
938.05	0.4537	0	1444.07
938.924	0.455297	0	1444.82
939.797	0.456901	0	1445.58
940.67	0.458512	0	1446.33
941.544	0.460128	0	1447.09
942.417	0.461749	0	1447.85
943.291	0.463377	0	1448.61
944.164	0.46501	0	1449.38
945.038	0.46665	0	1450.14
945.911	0.468295	0	1450.91
946.784	0.469948	0	1451.68
947.658	0.471606	0	1452.45
948.531	0.47327	0	1453.22
949.405	0.474939	0	1453.99
950.278	0.476615	0	1454.76
951.151	0.478296	0	1455.54
952.025	0.479983	0	1456.32
952.898	0.481676	0	1457.1
953.772	0.483376	0	1457.88
954.645	0.485081	0	1458.66
955.519	0.486792	0	1459.45
956.392	0.488509	0	1460.23
957.265	0.490232	0	1461.02
958.139	0.49196	0	1461.81
959.012	0.493694	0	1462.6
959.886	0.495435	0	1463.4
960.759	0.497181	0	1464.19
961.632	0.498933	0	1464.99
962.506	0.500691	0	1465.79
963.379	0.502455	0	1466.59
964.253	0.504223	0	1467.39
965.126	0.505998	0	1468.19
966	0.507778	0	1469
966.873	0.509564	0	1469.8
967.746	0.511355	0	1470.61
968.62	0.513152	0	1471.42
969.493	0.514954	0	1472.23
970.367	0.516761	0	1473.05
971.24	0.518573	0	1473.86
972.113	0.52039	0	1474.68
972.987	0.522212	0	1475.5
973.86	0.52404	0	1476.32
974.734	0.525873	0	1477.14
975.607	0.527711	0	1477.96
976.481	0.529554	0	1478.79
977.354	0.531403	0	1479.61
978.227	0.533256	0	1480.44
979.101	0.535115	0	1481.27
979.974	0.536979	0	1482.1
980.848	0.538849	0	1482.94
981.721	0.540724	0	1483.77
982.595	0.542603	0	1484.61
983.468	0.544488	0	1485.45
984.341	0.546377	0	1486.29
985.215	0.54827	0	1487.13
986.088	0.550168	0	1487.98
986.962	0.552071	0	1488.82
987.835	0.553979	0	1489.67
988.708	0.555891	0	1490.52
989.582	0.557807	0	1491.37
990.455	0.559728	0	1492.23
991.329	0.561654	0	1493.08
992.202	0.563583	0	1493.94
993.076	0.565517	0	1494.8
993.949	0.567456	0	1495.66
994.822	0.569399	0	1496.52
995.696	0.571346	0	1497.39
996.569	0.573298	0	1498.25
997.443	0.575254	0	1499.12
998.316	0.577213	0	1499.99
999.189	0.579177	0	1500.86
1000.06	0.581145	0	1501.73
1000.94	0.583117	0	1502.61
1001.81	0.585093	0	1503.49
1002.68	0.587073	0	1504.37
1003.56	0.589057	0	1505.25
1004.43	0.591044	0	1506.13
1005.3	0.593035	0	1507.01
1006.18	0.595029	0	1507.9
1007.05	0.597027	0	1508.79
1007.92	0.599028	0	1509.68
1008.8	0.601033	0	1510.57
1009.67	0.60304	0	1511.46
1010.54	0.605051	0	1512.36
1011.42	0.607065	0	1513.26
1012.29	0.609082	0	1514.15
1013.16	0.611102	0	1515.06
1014.04	0.613125	0	1515.96
1014.91	0.615151	0	1516.86
1015.78	0.61718	0	1517.77
1016.66	0.619213	0	1518.68
1017.53	0.621249	0	1519.59
1018.4	0.623287	0	1520.5
1019.28	0.625329	0	1521.42
1020.15	0.627374	0	1522.33
1021.02	0.629423	0	1523.25
1021.9	0.631474	0	1524.17
1022.77	0.633529	0	1525.09
1023.65	0.635588	0	1526.02
1024.52	0.63765	0	1526.94
1025.39	0.639715	0	1527.87
1026.27	0.641784	0	1528.8
1027.14	0.643856	0	1529.73
1028.01	0.64593	0	1530.67
1028.89	0.648008	0	1531.6
1029.76	0.650089	0	1532.54
1030.63	0.652172	0	1533.48
1031.51	0.654259	0	1534.42
1032.38	0.656348	0	1535.37
1033.25	0.65844	0	1536.31
1034.13	0.660534	0	1537.26
1035	0.662632	0	1538.21
1035.87	0.664734	0	1539.16
1036.75	0.666839	0	1540.12
1037.62	0.668947	0	1541.07
1038.49	0.671058	0	1542.03
1039.37	0.673172	0	1542.99
1040.24	0.675289	0	1543.95
1041.11	0.677409	0	1544.91
1041.99	0.679533	0	1545.88
1042.86	0.68166	0	1546.85
1043.73	0.68379	0	1547.82
1044.61	0.685923	0	1548.79
1045.48	0.688059	0	1549.77
1046.35	0.690197	0	1550.74
1047.23	0.692338	0	1551.72
1048.1	0.694482	0	1552.7
1048.97	0.696628	0	1553.68
1049.85	0.698776	0	1554.67
1050.72	0.700927	0	1555.65
1051.59	0.70308	0	1556.64
1052.47	0.705235	0	1557.63
1053.34	0.707392	0	1558.62
1054.21	0.709551	0	1559.62
1055.09	0.711712	0	1560.61
1055.96	0.713874	0	1561.61
1056.83	0.716037	0	1562.61
1057.71	0.718202	0	1563.62
1058.58	0.72037	0	1564.62
1059.46	0.722539	0	1565.63
1060.33	0.72471	0	1566.64
1061.2	0.726883	0	1567.65
1062.08	0.729057	0	1568.66
1062.95	0.731233	0	1569.68
1063.82	0.733411	0	1570.7
1064.7	0.73559	0	1571.72
1065.57	0.73777	0	1572.74
1066.44	0.739951	0	1573.76
1067.32	0.742133	0	1574.79
1068.19	0.744317	0	1575.82
1069.06	0.7465	0	1576.85
1069.94	0.748685	0	1577.88
1070.81	0.750871	0	1578.91
1071.68	0.753057	0	1579.95
1072.56	0.755244	0	1580.99
1073.43	0.757431	0	1582.03
1074.3	0.759619	0	1583.08
1075.18	0.761808	0	1584.12
1076.05	0.763996	0	1585.17
1076.92	0.766185	0	1586.22
1077.8	0.768374	0	1587.27
1078.67	0.770563	0	1588.33
1079.54	0.772752	0	1589.38
1080.42	0.77494	0	1590.44
1081.29	0.777128	0	1591.5
1082.16	0.779315	0	1592.56
1083.04	0.781502	0	1593.63
1083.91	0.783688	0	1594.7
1084.78	0.785873	0	1595.77
1085.66	0.788057	0	1596.84
1086.53	0.79024	0	1597.91
1087.4	0.792423	0	1598.99
1088.28	0.794604	0	1600.07
1089.15	0.796784	0	1601.15
1090.02	0.798964	0	1602.24
1090.9	0.801142	0	1603.32
1091.77	0.803319	0	1604.41
1092.65	0.805494	0	1605.5
1093.52	0.807669	0	1606.59
1094.39	0.809842	0	1607.69
1095.27	0.812013	0	1608.79
1096.14	0.814183	0	1609.89
1097.01	0.81635	0	1610.99
1097.89	0.818515	0	1612.1
1098.76	0.820678	0	1613.21
1099.63	0.822838	0	1614.32
1100.51	0.824996	0	1615.43
1101.38	0.827151	0	1616.54
1102.25	0.829303	0	1617.66
1103.13	0.831453	0	1618.78
1104	0.833599	0	1619.91
1104.87	0.835743	0	1621.03
1105.75	0.837883	0	1622.16
1106.62	0.840021	0	1623.29
1107.49	0.842155	0	1624.42
1108.37	0.844287	0	1625.56
1109.24	0.846415	0	1626.7
1110.11	0.84854	0	1627.84
1110.99	0.850661	0	1628.98
1111.86	0.852779	0	1630.13
1112.73	0.854894	0	1631.28
1113.61	0.857005	0	1632.43
1114.48	0.859113	0	1633.58
1115.35	0.861218	0	1634.74
1116.23	0.86332	0	1635.9
1117.1	0.865418	0	1637.06
1117.97	0.867512	0	1638.23
1118.85	0.869602	0	1639.4
1119.72	0.871688	0	1640.57
1120.59	0.87377	0	1641.74
1121.47	0.875849	0	1642.92
1122.34	0.877924	0	1644.1
1123.21	0.879995	0	1645.28
1124.09	0.882062	0	1646.46
1124.96	0.884126	0	1647.65
1125.83	0.886186	0	1648.84
1126.71	0.888244	0	1650.03
1127.58	0.890299	0	1651.23
1128.46	0.892351	0	1652.42
1129.33	0.8944	0	1653.62
1130.2	0.896446	0	1654.83
1131.08	0.898489	0	1656.03
1131.95	0.900529	0	1657.24
1132.82	0.902566	0	1658.46
1133.7	0.9046	0	1659.67
1134.57	0.906632	0	1660.89
1135.44	0.908661	0	1662.11
1136.32	0.910688	0	1663.33
1137.19	0.912713	0	1664.56
1138.06	0.914735	0	1665.78
1138.94	0.916754	0	1667.02
1139.81	0.91877	0	1668.25
1140.68	0.920783	0	1669.49
1141.56	0.922794	0	1670.73
1142.43	0.924803	0	1671.97
1143.3	0.926808	0	1673.21
1144.18	0.928811	0	1674.46
1145.05	0.930812	0	1675.71
1145.92	0.932809	0	1676.97
1146.8	0.934804	0	1678.22
1147.67	0.936796	0	1679.48
1148.54	0.938786	0	1680.75
1149.42	0.940775	0	1682.01
1150.29	0.942762	0	1683.28
1151.16	0.944747	0	1684.55
1152.04	0.946732	0	1685.83
1152.91	0.948714	0	1687.1
1153.78	0.950696	0	1688.38
1154.66	0.952676	0	1689.67
1155.53	0.954654	0	1690.95
1156.4	0.956631	0	1692.24
1157.28	0.958607	0	1693.53
1158.15	0.960581	0	1694.83
1159.02	0.962554	0	1696.13
1159.9	0.964525	0	1697.43
1160.77	0.966495	0	1698.73
1161.65	0.968464	0	1700.04
1162.52	0.970432	0	1701.35
1163.39	0.972399	0	1702.66
1164.27	0.974365	0	1703.98
1165.14	0.976331	0	1705.3
1166.01	0.978298	0	1706.62
1166.89	0.980265	0	1707.95
1167.76	0.982232	0	1709.28
1168.63	0.984198	0	1710.61
1169.51	0.986164	0	1711.95
1170.38	0.988129	0	1713.29
1171.25	0.990094	0	1714.63
1172.13	0.992058	0	1715.98
1173	0.994022	0	1717.32
1173.87	0.995985	0	1718.68
1174.75	0.997948	0	1720.03
1175.62	0.999911	0	1721.39
1176.49	1.00187	0	1722.75
1177.37	1.00384	0	1724.12
1178.24	1.0058	0	1725.49
1179.11	1.00776	0	1726.86
1179.99	1.00972	0	1728.24
1180.86	1.01169	0	1729.62
1181.73	1.01365	0	1731
1182.61	1.01561	0	1732.38
1183.48	1.01757	0	1733.77
1184.35	1.01954	0	1735.17
1185.23	1.0215	0	1736.56
1186.1	1.02346	0	1737.96
1186.97	1.02542	0	1739.36
1187.85	1.02737	0	1740.77
1188.72	1.02933	0	1742.18
1189.59	1.03128	0	1743.59
1190.47	1.03324	0	1745.01
1191.34	1.03519	0	1746.43
1192.21	1.03715	0	1747.85
1193.09	1.0391	0	1749.28
1193.96	1.04106	0	1750.71
1194.83	1.04301	0	1752.14
1195.71	1.04497	0	1753.58
1196.58	1.04692	0	1755.02
1197.46	1.04887	0	1756.46
1198.33	1.05083	0	1757.91
1199.2	1.05278	0	1759.36
1200.08	1.05473	0	1760.82
1200.95	1.05669	0	1762.27
1201.82	1.05864	0	1763.74
1202.7	1.0606	0	1765.2
1203.57	1.06255	0	1766.67
1204.44	1.06451	0	1768.14
1205.32	1.06646	0	1769.62
1206.19	1.06842	0	1771.1
1207.06	1.07037	0	1772.58
1207.94	1.07233	0	1774.07
1208.81	1.07428	0	1775.56
1209.68	1.07624	0	1777.05
1210.56	1.07819	0	1778.55
1211.43	1.08014	0	1780.05
1212.3	1.08209	0	1781.55
1213.18	1.08405	0	1783.06
1214.05	1.086	0	1784.57
1214.92	1.08795	0	1786.08
1215.8	1.0899	0	1787.6
1216.67	1.09185	0	1789.12
1217.54	1.0938	0	1790.65
1218.42	1.09574	0	1792.18
1219.29	1.09769	0	1793.71
1220.16	1.09964	0	1795.25
1221.04	1.10158	0	1796.79
1221.91	1.10353	0	1798.33
1222.78	1.10547	0	1799.88
1223.66	1.10742	0	1801.43
1224.53	1.10936	0	1802.98
1225.4	1.11131	0	1804.54
1226.28	1.11325	0	1806.1
1227.15	1.11519	0	1807.66
1228.02	1.11714	0	1809.23
1228.9	1.11908	0	1810.8
1229.77	1.12101	0	1812.38
1230.65	1.12295	0	1813.96
1231.52	1.12489	0	1815.54
1232.39	1.12682	0	1817.12
1233.27	1.12876	0	1818.71
1234.14	1.13069	0	1820.3
1235.01	1.13262	0	1821.9
1235.89	1.13455	0	1823.5
1236.76	1.13647	0	1825.1
1237.63	1.1384	0	1826.71
1238.51	1.14032	0	1828.32
1239.38	1.14225	0	1829.93
1240.25	1.14417	0	1831.55
1241.13	1.14609	0	1833.17
1242	1.148	0	1834.79
1242.87	1.14992	0	1836.42
1243.75	1.15183	0	1838.05
1244.62	1.15374	0	1839.68
1245.49	1.15565	0	1841.32
1246.37	1.15755	0	1842.96
1247.24	1.15946	0	1844.61
1248.11	1.16136	0	1846.26
1248.99	1.16326	0	1847.91
1249.86	1.16515	0	1849.56
1250.73	1.16704	0	1851.22
1251.61	1.16893	0	1852.88
1252.48	1.17082	0	1854.55
1253.35	1.17271	0	1856.22
1254.23	1.17459	0	1857.89
1255.1	1.17647	0	1859.57
1255.97	1.17834	0	1861.25
1256.85	1.18022	0	1862.94
1257.72	1.18209	0	1864.62
1258.59	1.18397	0	1866.32
1259.47	1.18584	0	1868.01
1260.34	1.18772	0	1869.71
1261.21	1.1896	0	1871.41
1262.09	1.19148	0	1873.12
1262.96	1.19336	0	1874.83
1263.83	1.19524	0	1876.54
1264.71	1.19712	0	1878.26
1265.58	1.199	0	1879.98
1266.46	1.20087	0	1881.7
1267.33	1.20275	0	1883.43
1268.2	1.20462	0	1885.16
1269.08	1.2065	0	1886.9
1269.95	1.20838	0	1888.64
1270.82	1.21026	0	1890.38
1271.7	1.21215	0	1892.13
1272.57	1.21404	0	1893.88
1273.44	1.21593	0	1895.64
1274.32	1.21782	0	1897.4
1275.19	1.21971	0	1899.16
1276.06	1.2216	0	1900.92
1276.94	1.2235	0	1902.69
1277.81	1.22539	0	1904.47
1278.68	1.22728	0	1906.25
1279.56	1.22918	0	1908.03
1280.43	1.23108	0	1909.82
1281.3	1.23297	0	1911.61
1282.18	1.23487	0	1913.4
1283.05	1.23677	0	1915.2
1283.92	1.23867	0	1917
1284.8	1.24057	0	1918.81
1285.67	1.24247	0	1920.62
1286.54	1.24437	0	1922.43
1287.42	1.24627	0	1924.25
1288.29	1.24817	0	1926.07
1289.16	1.25008	0	1927.9
1290.04	1.25198	0	1929.73
1290.91	1.25389	0	1931.56
1291.78	1.2558	0	1933.4
1292.66	1.25771	0	1935.24
1293.53	1.25962	0	1937.09
1294.4	1.26153	0	1938.94
1295.28	1.26344	0	1940.8
1296.15	1.26535	0	1942.66
1297.02	1.26727	0	1944.52
1297.9	1.26918	0	1946.39
1298.77	1.2711	0	1948.27
1299.64	1.27302	0	1950.14
1300.52	1.27495	0	1952.03
1301.39	1.27687	0	1953.91
1302.27	1.2788	0	1955.81
1303.14	1.28073	0	1957.7
1304.01	1.28266	0	1959.6
1304.89	1.2846	0	1961.51
1305.76	1.28654	0	1963.42
1306.63	1.28848	0	1965.34
1307.51	1.29042	0	1967.26
1308.38	1.29236	0	1969.19
1309.25	1.29431	0	1971.12
1310.13	1.29625	0	1973.05
1311	1.2982	0	1974.99
1311.87	1.30015	0	1976.94
1312.75	1.3021	0	1978.89
1313.62	1.30405	0	1980.84
1314.49	1.30601	0	1982.8
1315.37	1.30797	0	1984.77
1316.24	1.30993	0	1986.74
1317.11	1.3119	0	1988.72
1317.99	1.31386	0	1990.7
1318.86	1.31583	0	1992.68
1319.73	1.3178	0	1994.67
1320.61	1.31977	0	1996.67
1321.48	1.32175	0	1998.67
1322.35	1.32372	0	2000.68
1323.23	1.32571	0	2002.69
1324.1	1.3277	0	2004.71
1324.97	1.32969	0	2006.73
1325.85	1.33169	0	2008.76
1326.72	1.33369	0	2010.8
1327.59	1.3357	0	2012.84
1328.47	1.33771	0	2014.88
1329.34	1.33972	0	2016.93
1330.21	1.34174	0	2018.99
1331.09	1.34376	0	2021.05
1331.96	1.34579	0	2023.12
1332.83	1.34782	0	2025.19
1333.71	1.34986	0	2027.27
1334.58	1.35191	0	2029.35
1335.46	1.35396	0	2031.44
1336.33	1.35602	0	2033.54
1337.2	1.35809	0	2035.64
1338.08	1.36017	0	2037.74
1338.95	1.36226	0	2039.85
1339.82	1.36435	0	2041.97
1340.7	1.36646	0	2044.09
1341.57	1.36857	0	2046.22
1342.44	1.37068	0	2048.35
1343.32	1.37281	0	2050.49
1344.19	1.37494	0	2052.63
1345.06	1.37708	0	2054.78
1345.94	1.37922	0	2056.94
1346.81	1.38136	0	2059.1
1347.68	1.38352	0	2061.26
1348.56	1.38567	0	2063.43
1349.43	1.38784	0	2065.61
1350.3	1.39001	0	2067.79
1351.18	1.39218	0	2069.97
1352.05	1.39436	0	2072.16
1352.92	1.39655	0	2074.36
1353.8	1.39875	0	2076.56
1354.67	1.40095	0	2078.77
1355.54	1.40316	0	2080.98
1356.42	1.40538	0	2083.19
1357.29	1.40761	0	2085.41
1358.16	1.40984	0	2087.64
1359.04	1.41208	0	2089.87
1359.91	1.41434	0	2092.11
1360.78	1.41659	0	2094.35
1361.66	1.41886	0	2096.6
1362.53	1.42114	0	2098.85
1363.4	1.42343	0	2101.11
1364.28	1.42572	0	2103.37
1365.15	1.42802	0	2105.64
1366.02	1.43033	0	2107.91
1366.9	1.43265	0	2110.19
1367.77	1.43498	0	2112.47
1368.64	1.43732	0	2114.76
1369.52	1.43967	0	2117.05
1370.39	1.44202	0	2119.35
1371.27	1.44438	0	2121.66
1372.14	1.44675	0	2123.96
1373.01	1.44913	0	2126.28
1373.89	1.45152	0	2128.6
1374.76	1.45392	0	2130.92
1375.63	1.45633	0	2133.25
1376.51	1.45875	0	2135.59
1377.38	1.46118	0	2137.93
1378.25	1.46362	0	2140.27
1379.13	1.46607	0	2142.62
1380	1.46853	0	2144.98
1380.87	1.47101	0	2147.34
1381.75	1.47349	0	2149.7
1382.62	1.47599	0	2152.08
1383.49	1.4785	0	2154.45
1384.37	1.48103	0	2156.83
1385.24	1.48356	0	2159.22
1386.11	1.48611	0	2161.61
1386.99	1.48868	0	2164.01
1387.86	1.49127	0	2166.42
1388.73	1.49387	0	2168.82
1389.61	1.49649	0	2171.24
1390.48	1.49912	0	2173.66
1391.35	1.50177	0	2176.08
1392.23	1.50444	0	2178.51
1393.1	1.50712	0	2180.95
1393.97	1.50983	0	2183.39
1394.85	1.51255	0	2185.84
1395.72	1.51528	0	2188.29
1396.59	1.51804	0	2190.75
1397.47	1.52081	0	2193.21
1398.34	1.5236	0	2195.68
1399.21	1.5264	0	2198.16
1400.09	1.52923	0	2200.64
1400.96	1.53207	0	2203.13
1401.83	1.53493	0	2205.62
1402.71	1.53781	0	2208.12
1403.58	1.5407	0	2210.62
1404.46	1.54362	0	2213.13
1405.33	1.54654	0	2215.64
1406.2	1.54949	0	2218.17
1407.08	1.55246	0	2220.69
1407.95	1.55544	0	2223.23
1408.82	1.55845	0	2225.77
1409.7	1.56147	0	2228.31
1410.57	1.56452	0	2230.87
1411.44	1.56759	0	2233.43
1412.32	1.57068	0	2235.99
1413.19	1.57379	0	2238.57
1414.06	1.57692	0	2241.15
1414.94	1.58007	0	2243.73
1415.81	1.58324	0	2246.33
1416.68	1.58644	0	2248.93
1417.56	1.58965	0	2251.54
1418.43	1.5929	0	2254.15
1419.3	1.59616	0	2256.78
1420.18	1.59944	0	2259.41
1421.05	1.60274	0	2262.04
1421.92	1.60607	0	2264.69
1422.8	1.60941	0	2267.34
1423.67	1.61278	0	2270
1424.54	1.61617	0	2272.67
1425.42	1.61958	0	2275.34
1426.29	1.62301	0	2278.02
1427.16	1.62645	0	2280.71
1428.04	1.62992	0	2283.41
1428.91	1.6334	0	2286.12
1429.78	1.6369	0	2288.83
1430.66	1.64042	0	2291.55
1431.53	1.64396	0	2294.28
1432.4	1.64752	0	2297.02
1433.28	1.65109	0	2299.77
1434.15	1.65468	0	2302.52
1435.02	1.65829	0	2305.28
1435.9	1.66191	0	2308.05
1436.77	1.66555	0	2310.83
1437.64	1.6692	0	2313.62
1438.52	1.67287	0	2316.42
1439.39	1.67655	0	2319.22
1440.27	1.68024	0	2322.03
1441.14	1.68395	0	2324.86
1442.01	1.68768	0	2327.69
1442.89	1.69142	0	2330.53
1443.76	1.69518	0	2333.38
1444.63	1.69895	0	2336.24
1445.51	1.70274	0	2339.11
1446.38	1.70656	0	2341.98
1447.25	1.71039	0	2344.87
1448.13	1.71425	0	2347.76
1449	1.71812	0	2350.67
1449.87	1.72202	0	2353.58
1450.75	1.72594	0	2356.51
1451.62	1.72988	0	2359.44
1452.49	1.73384	0	2362.38
1453.37	1.73782	0	2365.33
1454.24	1.74182	0	2368.29
1455.11	1.74584	0	2371.26
1455.99	1.74988	0	2374.24
1456.86	1.75394	0	2377.23
1457.73	1.75801	0	2380.23
1458.61	1.7621	0	2383.23
1459.48	1.7662	0	2386.25
1460.35	1.77032	0	2389.27
1461.23	1.77445	0	2392.31
1462.1	1.7786	0	2395.35
1462.97	1.78276	0	2398.4
1463.85	1.78693	0	2401.47
1464.72	1.79112	0	2404.54
1465.59	1.79532	0	2407.62
1466.47	1.79953	0	2410.71
1467.34	1.80376	0	2413.8
1468.21	1.80799	0	2416.91
1469.09	1.81224	0	2420.03
1469.96	1.81649	0	2423.15
1470.83	1.82076	0	2426.29
1471.71	1.82504	0	2429.43
1472.58	1.82933	0	2432.59
1473.46	1.83362	0	2435.75
1474.33	1.83792	0	2438.92
1475.2	1.84223	0	2442.1
1476.08	1.84655	0	2445.29
1476.95	1.85088	0	2448.49
1477.82	1.85521	0	2451.69
1478.7	1.85956	0	2454.91
1479.57	1.8639	0	2458.14
1480.44	1.86826	0	2461.37
1481.32	1.87262	0	2464.61
1482.19	1.87698	0	2467.86
1483.06	1.88135	0	2471.12
1483.94	1.88573	0	2474.39
1484.81	1.89011	0	2477.67
1485.68	1.89449	0	2480.96
1486.56	1.89888	0	2484.25
1487.43	1.90327	0	2487.55
1488.3	1.90767	0	2490.86
1489.18	1.91206	0	2494.18
1490.05	1.91646	0	2497.51
1490.92	1.92087	0	2500.84
1491.8	1.92528	0	2504.19
1492.67	1.92968	0	2507.54
1493.54	1.93409	0	2510.9
1494.42	1.9385	0	2514.26
1495.29	1.94291	0	2517.64
1496.16	1.94732	0	2521.02
1497.04	1.95173	0	2524.41
1497.91	1.95614	0	2527.8
1498.78	1.96055	0	2531.21
1499.66	1.96495	0	2534.62
1500.53	1.96935	0	2538.03
1501.4	1.97374	0	2541.46
1502.28	1.97813	0	2544.89
1503.15	1.98251	0	2548.33
1504.02	1.98688	0	2551.77
1504.9	1.99123	0	2555.23
1505.77	1.99557	0	2558.69
1506.64	1.9999	0	2562.15
1507.52	2.00423	0	2565.63
1508.39	2.00854	0	2569.11
1509.27	2.01285	0	2572.6
1510.14	2.01715	0	2576.09
1511.01	2.02143	0	2579.59
1511.89	2.02571	0	2583.1
1512.76	2.02997	0	2586.61
1513.63	2.03423	0	2590.13
1514.51	2.03847	0	2593.65
1515.38	2.0427	0	2597.19
1516.25	2.04693	0	2600.72
1517.13	2.05115	0	2604.27
1518	2.05536	0	2607.82
1518.87	2.05957	0	2611.38
1519.75	2.06376	0	2614.94
1520.62	2.06795	0	2618.51
1521.49	2.07213	0	2622.08
1522.37	2.0763	0	2625.66
1523.24	2.08047	0	2629.24
1524.11	2.08462	0	2632.83
1524.99	2.08878	0	2636.43
1525.86	2.09292	0	2640.03
1526.73	2.09705	0	2643.63
1527.61	2.10117	0	2647.24
1528.48	2.10526	0	2650.86
1529.35	2.10934	0	2654.48
1530.23	2.11341	0	2658.1
1531.1	2.11746	0	2661.73
1531.97	2.1215	0	2665.37
1532.85	2.12553	0	2669.01
1533.72	2.12955	0	2672.65
1534.59	2.13356	0	2676.3
1535.47	2.13756	0	2679.95
1536.34	2.14155	0	2683.61
1537.21	2.14553	0	2687.27
1538.09	2.1495	0	2690.93
1538.96	2.15346	0	2694.6
1539.83	2.1574	0	2698.27
1540.71	2.16134	0	2701.95
1541.58	2.16525	0	2705.63
1542.46	2.16915	0	2709.32
1543.33	2.17304	0	2713.01
1544.2	2.17692	0	2716.7
1545.08	2.18079	0	2720.4
1545.95	2.18464	0	2724.1
1546.82	2.18849	0	2727.81
1547.7	2.19232	0	2731.52
1548.57	2.19614	0	2735.24
1549.44	2.19995	0	2738.96
1550.32	2.20375	0	2742.68
1551.19	2.20755	0	2746.41
1552.06	2.21133	0	2750.14
1552.94	2.2151	0	2753.88
1553.81	2.21887	0	2757.62
1554.68	2.22262	0	2761.37
1555.56	2.22637	0	2765.11
1556.43	2.2301	0	2768.86
1557.3	2.23382	0	2772.62
1558.18	2.23753	0	2776.38
1559.05	2.24122	0	2780.14
1559.92	2.24491	0	2783.9
1560.8	2.24859	0	2787.67
1561.67	2.25226	0	2791.44
1562.54	2.25591	0	2795.22
1563.42	2.25954	0	2799
1564.29	2.26314	0	2802.78
1565.16	2.26673	0	2806.56
1566.04	2.27029	0	2810.34
1566.91	2.27382	0	2814.13
1567.78	2.27734	0	2817.93
1568.66	2.28084	0	2821.72
1569.53	2.28432	0	2825.52
1570.4	2.28779	0	2829.32
1571.28	2.29124	0	2833.13
1572.15	2.29467	0	2836.93
1573.02	2.29809	0	2840.74
1573.9	2.30149	0	2844.55
1574.77	2.30488	0	2848.37
1575.64	2.30826	0	2852.19
1576.52	2.31164	0	2856.01
1577.39	2.31501	0	2859.83
1578.27	2.31838	0	2863.66
1579.14	2.32175	0	2867.48
1580.01	2.3251	0	2871.32
1580.89	2.32844	0	2875.15
1581.76	2.33177	0	2878.99
1582.63	2.3351	0	2882.82
1583.51	2.33842	0	2886.67
1584.38	2.34173	0	2890.51
1585.25	2.34503	0	2894.35
1586.13	2.34831	0	2898.2
1587	2.35158	0	2902.05
1587.87	2.35483	0	2905.9
1588.75	2.35807	0	2909.76
1589.62	2.36128	0	2913.62
1590.49	2.36448	0	2917.48
1591.37	2.36766	0	2921.34
1592.24	2.37083	0	2925.21
1593.11	2.37398	0	2929.07
1593.99	2.37713	0	2932.94
1594.86	2.38028	0	2936.82
1595.73	2.38343	0	2940.7
1596.61	2.38657	0	2944.57
1597.48	2.3897	0	2948.46
1598.35	2.39283	0	2952.34
1599.23	2.39596	0	2956.23
1600.1	2.39909	0	2960.12
1600.97	2.40222	0	2964.01
1601.85	2.40535	0	2967.91
1602.72	2.40849	0	2971.81
1603.59	2.41163	0	2975.71
1604.47	2.41479	0	2979.61
1605.34	2.41796	0	2983.51
1606.21	2.42114	0	2987.42
1607.09	2.42433	0	2991.33
1607.96	2.42753	0	2995.24
1608.83	2.43073	0	2999.16
1609.71	2.43393	0	3003.07
1610.58	2.43712	0	3006.99
1611.45	2.44031	0	3010.9
1612.33	2.44349	0	3014.82
1613.2	2.44666	0	3018.74
1614.08	2.44982	0	3022.67
1614.95	2.45297	0	3026.59
1615.82	2.45612	0	3030.52
1616.7	2.45927	0	3034.45
1617.57	2.46242	0	3038.38
1618.44	2.46558	0	3042.31
1619.32	2.46873	0	3046.25
1620.19	2.47189	0	3050.19
1621.06	2.47506	0	3054.13
1621.94	2.47825	0	3058.07
1622.81	2.48144	0	3062.02
1623.68	2.48464	0	3065.97
1624.56	2.48786	0	3069.92
1625.43	2.49109	0	3073.88
1626.3	2.49434	0	3077.84
1627.18	2.4976	0	3081.8
1628.05	2.50087	0	3085.77
1628.92	2.50417	0	3089.74
1629.8	2.5075	0	3093.71
1630.67	2.51086	0	3097.69
1631.54	2.51424	0	3101.67
1632.42	2.51765	0	3105.65
1633.29	2.52107	0	3109.63
1634.16	2.52452	0	3113.62
1635.04	2.52798	0	3117.61
1635.91	2.53145	0	3121.6
1636.78	2.53491	0	3125.59
1637.66	2.53837	0	3129.59
1638.53	2.54183	0	3133.59
1639.4	2.5453	0	3137.59
1640.28	2.54877	0	3141.59
1641.15	2.55226	0	3145.6
1642.02	2.55576	0	3149.61
1642.9	2.55927	0	3153.62
1643.77	2.5628	0	3157.64
1644.64	2.56635	0	3161.66
1645.52	2.56992	0	3165.69
1646.39	2.57353	0	3169.71
1647.27	2.57718	0	3173.74
1648.14	2.58087	0	3177.77
1649.01	2.58459	0	3181.81
1649.89	2.58836	0	3185.85
1650.76	2.59215	0	3189.89
1651.63	2.59595	0	3193.94
1652.51	2.59976	0	3197.99
1653.38	2.60357	0	3202.05
1654.25	2.60741	0	3206.11
1655.13	2.61127	0	3210.18
1656	2.61516	0	3214.25
1656.87	2.61912	0	3218.33
1657.75	2.62311	0	3222.41
1658.62	2.62715	0	3226.49
1659.49	2.63122	0	3230.59
1660.37	2.63531	0	3234.68
1661.24	2.63944	0	3238.78
1662.11	2.64359	0	3242.89
1662.99	2.64776	0	3247
1663.86	2.65197	0	3251.12
1664.73	2.6562	0	3255.24
1665.61	2.66046	0	3259.37
1666.48	2.66474	0	3263.5
1667.35	2.66903	0	3267.64
1668.23	2.67333	0	3271.78
1669.1	2.67764	0	3275.93
1669.97	2.68195	0	3280.08
1670.85	2.68626	0	3284.25
1671.72	2.69057	0	3288.41
1672.59	2.69488	0	3292.58
1673.47	2.69919	0	3296.76
1674.34	2.70349	0	3300.95
1675.21	2.70779	0	3305.14
1676.09	2.7121	0	3309.33
1676.96	2.71641	0	3313.53
1677.83	2.72074	0	3317.74
1678.71	2.7251	0	3321.96
1679.58	2.72948	0	3326.18
1680.45	2.73389	0	3330.41
1681.33	2.73832	0	3334.64
1682.2	2.74278	0	3338.88
1683.08	2.74727	0	3343.12
1683.95	2.75179	0	3347.38
1684.82	2.75635	0	3351.63
1685.7	2.76095	0	3355.9
1686.57	2.76558	0	3360.17
1687.44	2.77024	0	3364.44
1688.32	2.77493	0	3368.72
1689.19	2.77965	0	3373.01
1690.06	2.78438	0	3377.3
1690.94	2.78915	0	3381.59
1691.81	2.79394	0	3385.9
1692.68	2.79875	0	3390.2
1693.56	2.80356	0	3394.52
1694.43	2.80838	0	3398.84
1695.3	2.81318	0	3403.16
1696.18	2.81797	0	3407.49
1697.05	2.82275	0	3411.83
1697.92	2.82751	0	3416.17
1698.8	2.83225	0	3420.52
1699.67	2.83698	0	3424.88
1700.54	2.84169	0	3429.24
1701.42	2.8464	0	3433.61
1702.29	2.85111	0	3437.98
1703.16	2.85581	0	3442.36
1704.04	2.86051	0	3446.75
1704.91	2.86521	0	3451.14
1705.78	2.8699	0	3455.54
1706.66	2.87457	0	3459.94
1707.53	2.87924	0	3464.36
1708.4	2.88388	0	3468.77
1709.28	2.88851	0	3473.2
1710.15	2.89312	0	3477.63
1711.02	2.8977	0	3482.07
1711.9	2.90227	0	3486.51
1712.77	2.90682	0	3490.96
1713.64	2.91136	0	3495.42
1714.52	2.91588	0	3499.88
1715.39	2.9204	0	3504.35
1716.27	2.92491	0	3508.82
1717.14	2.9294	0	3513.3
1718.01	2.93387	0	3517.79
1718.89	2.9383	0	3522.29
1719.76	2.94269	0	3526.79
1720.63	2.94704	0	3531.3
1721.51	2.95136	0	3535.81
1722.38	2.95563	0	3540.33
1723.25	2.95986	0	3544.85
1724.13	2.96406	0	3549.38
1725	2.96821	0	3553.92
1725.87	2.97232	0	3558.46
1726.75	2.97639	0	3563
1727.62	2.98042	0	3567.56
1728.49	2.98442	0	3572.11
1729.37	2.98839	0	3576.68
1730.24	2.99232	0	3581.25
1731.11	2.99623	0	3585.82
1731.99	3.00013	0	3590.4
1732.86	3.00401	0	3594.99
1733.73	3.00789	0	3599.59
1734.61	3.01177	0	3604.18
1735.48	3.01564	0	3608.79
1736.35	3.01951	0	3613.4
1737.23	3.02336	0	3618.01
1738.1	3.02721	0	3622.63
1738.97	3.03105	0	3627.25
1739.85	3.03486	0	3631.88
1740.72	3.03865	0	3636.52
1741.59	3.04242	0	3641.16
1742.47	3.04617	0	3645.8
1743.34	3.0499	0	3650.45
1744.21	3.0536	0	3655.1
1745.09	3.05729	0	3659.76
[truncated: 6,001 more rows]

## Sheet: c
Time (s)	NH3_(pH=5)(base case)	NH3_(pH=4)	NH3_(pH=6)	NH3_(pH=7)
0	1	1	1	1
8.73417	0.999958	0.999958	0.999958	0.999958
17.4683	0.999954	0.999954	0.999954	0.999954
26.2025	0.999951	0.999951	0.999951	0.999951
34.9367	0.999951	0.999951	0.999951	0.999951
43.6709	0.999953	0.999953	0.999953	0.999953
52.405	0.999956	0.999956	0.999956	0.999956
61.1392	0.999959	0.999959	0.999959	0.999959
69.8734	0.999964	0.999964	0.999964	0.999964
78.6076	0.99997	0.99997	0.99997	0.99997
87.3417	0.999977	0.999977	0.999977	0.999977
96.0759	0.999983	0.999983	0.999983	0.999983
104.81	0.999989	0.999989	0.999989	0.999989
113.544	0.999992	0.999992	0.999992	0.999992
122.278	0.999994	0.999994	0.999994	0.999994
131.013	0.999995	0.999995	0.999995	0.999995
139.747	0.999995	0.999995	0.999995	0.999995
148.481	0.999996	0.999996	0.999996	0.999996
157.215	0.999997	0.999997	0.999997	0.999997
165.949	1	1	1	1
174.683	1	1	1	1
183.418	1.00001	1.00001	1.00001	1.00001
192.152	1.00001	1.00001	1.00001	1.00001
200.886	1.00002	1.00002	1.00002	1.00002
209.62	1.00002	1.00002	1.00002	1.00002
218.354	1.00002	1.00002	1.00002	1.00002
227.089	1.00003	1.00003	1.00003	1.00003
235.823	1.00003	1.00003	1.00003	1.00003
244.557	1.00003	1.00003	1.00003	1.00003
253.291	1.00002	1.00002	1.00002	1.00002
262.025	1.00002	1.00002	1.00002	1.00002
270.759	1.00002	1.00002	1.00002	1.00002
279.494	1.00003	1.00003	1.00003	1.00003
288.228	1.00003	1.00003	1.00003	1.00003
296.962	1.00003	1.00003	1.00003	1.00003
305.696	1.00004	1.00004	1.00004	1.00004
314.43	1.00004	1.00004	1.00004	1.00004
323.164	1.00005	1.00005	1.00005	1.00005
331.899	1.00005	1.00005	1.00005	1.00005
340.633	1.00005	1.00005	1.00005	1.00005
349.367	1.00005	1.00005	1.00005	1.00005
358.101	1.00004	1.00004	1.00004	1.00004
366.835	1.00004	1.00004	1.00004	1.00004
375.569	1.00003	1.00003	1.00003	1.00003
384.304	1.00003	1.00003	1.00003	1.00003
393.038	1.00003	1.00003	1.00003	1.00003
401.772	1.00003	1.00003	1.00003	1.00003
410.506	1.00003	1.00003	1.00003	1.00003
419.24	1.00003	1.00003	1.00003	1.00003
427.974	1.00004	1.00004	1.00004	1.00004
436.709	1.00005	1.00005	1.00005	1.00005
445.443	1.00006	1.00006	1.00006	1.00006
454.177	1.00006	1.00006	1.00006	1.00006
462.911	0.999977	0.999977	0.999983	1.00002
471.645	0.999185	0.999169	0.999321	0.999806
480.38	0.997176	0.997094	0.997826	0.999462
489.114	0.993421	0.993169	0.99529	0.998965
497.848	0.987377	0.986777	0.991544	0.998307
506.582	0.978548	0.977333	0.986483	0.997489
515.316	0.966513	0.964314	0.980064	0.996516
524.05	0.950951	0.947293	0.972303	0.995397
532.785	0.931673	0.925973	0.963268	0.994144
541.519	0.908632	0.900211	0.953076	0.992774
550.253	0.881942	0.870043	0.941886	0.991306
558.987	0.851868	0.835682	0.929885	0.989759
567.721	0.818802	0.797501	0.917266	0.98815
576.455	0.783228	0.756	0.904208	0.986489
585.19	0.745684	0.711769	0.890858	0.984781
593.924	0.706722	0.665451	0.877325	0.983027
602.658	0.666894	0.617718	0.863691	0.981227
611.392	0.626735	0.569253	0.85001	0.979381
620.126	0.586739	0.520719	0.836314	0.977484
628.86	0.54735	0.472744	0.822613	0.975532
637.595	0.508968	0.425914	0.808922	0.973526
646.329	0.471951	0.380771	0.795269	0.971472
655.063	0.436597	0.337783	0.781674	0.96937
663.797	0.403136	0.297335	0.768151	0.967219
672.531	0.371743	0.25973	0.754724	0.965026
681.266	0.342536	0.225183	0.741418	0.962792
690	0.315569	0.193815	0.728247	0.960516
698.734	0.290846	0.165667	0.715228	0.958202
707.468	0.268327	0.140698	0.702378	0.955851
716.202	0.247932	0.118806	0.689709	0.953464
724.936	0.229551	0.0998282	0.677228	0.951034
733.671	0.213052	0.0835613	0.664946	0.948577
742.405	0.198291	0.0697726	0.652875	0.946083
751.139	0.185115	0.0582111	0.641026	0.943558
759.873	0.17337	0.0486187	0.629411	0.941004
768.607	0.162904	0.040739	0.618033	0.938421
777.341	0.153572	0.0343263	0.6069	0.935813
786.076	0.145237	0.0291514	0.596017	0.933182
794.81	0.137773	0.0250055	0.585385	0.930527
803.544	0.131065	0.0217022	0.574986	0.927839
812.278	0.125005	0.0190794	0.564804	0.925117
821.012	0.119502	0.0169992	0.554828	0.922361
829.746	0.114481	0.0153468	0.545056	0.919571
838.481	0.109874	0.0140281	0.535483	0.916748
847.215	0.105628	0.0129671	0.526108	0.913892
855.949	0.101698	0.0121038	0.516937	0.911008
864.683	0.0980498	0.0113918	0.507982	0.908104
873.417	0.0946543	0.0107954	0.499254	0.905184
882.152	0.0914876	0.0102872	0.49076	0.902252
890.886	0.0885294	0.00984716	0.482506	0.89931
899.62	0.0857629	0.0094601	0.4745	0.896367
908.354	0.0831758	0.00911527	0.466757	0.893434
917.088	0.080757	0.00880477	0.459288	0.890514
925.822	0.0784955	0.00852271	0.452094	0.887611
934.557	0.0763806	0.00826466	0.445174	0.884727
943.291	0.0744036	0.00802744	0.438533	0.88187
952.025	0.072559	0.0078089	0.432184	0.879055
960.759	0.0708444	0.00760771	0.426151	0.876298
969.493	0.0692575	0.0074229	0.420454	0.873613
978.227	0.0677966	0.00725376	0.415111	0.871014
986.962	0.0664594	0.00709968	0.410136	0.86851
995.696	0.065242	0.00695998	0.405531	0.866108
1004.43	0.0641402	0.00683398	0.401297	0.863816
1013.16	0.0631503	0.0067211	0.397437	0.861643
1021.9	0.0622684	0.00662079	0.393951	0.859592
1030.63	0.0614879	0.00653221	0.39082	0.857656
1039.37	0.0608019	0.00645454	0.388029	0.855835
1048.1	0.0602039	0.00638698	0.385558	0.854121
1056.83	0.0596847	0.00632845	0.383374	0.8525
1065.57	0.0592379	0.0062782	0.381461	0.850971
1074.3	0.0588561	0.00623537	0.379789	0.84952
1083.04	0.0585317	0.00619908	0.378332	0.848135
1091.77	0.0582571	0.00616846	0.37706	0.846803
1100.51	0.0580231	0.00614249	0.375933	0.845502
1109.24	0.0578208	0.00612018	0.374916	0.844218
1117.97	0.057643	0.00610068	0.37398	0.842941
1126.71	0.0574815	0.0060831	0.37309	0.841651
1135.44	0.0573254	0.00606621	0.372195	0.840314
1144.18	0.0571583	0.00604824	0.371218	0.838888
1152.91	0.0569688	0.00602787	0.370114	0.837366
1161.65	0.056751	0.00600446	0.368868	0.83575
1170.38	0.0564998	0.00597738	0.367458	0.834026
1179.11	0.0562074	0.0059458	0.365852	0.832175
1187.85	0.0558681	0.00590905	0.364026	0.830189
1196.58	0.0554801	0.00586694	0.361979	0.828077
1205.32	0.0550385	0.00581889	0.359684	0.82581
1214.05	0.0545366	0.00576421	0.35711	0.823375
1222.78	0.0539714	0.00570252	0.354246	0.820774
1231.52	0.0533403	0.00563356	0.351081	0.817993
1240.25	0.0526398	0.00555695	0.347596	0.815021
1248.99	0.0518687	0.00547253	0.343784	0.811858
1257.72	0.0510265	0.00538028	0.339642	0.808491
1266.46	0.050104	0.00527922	0.335111	0.804863
1275.19	0.0490978	0.00516898	0.330175	0.800989
1283.92	0.0480113	0.00504995	0.324852	0.796871
1292.66	0.0468511	0.00492284	0.319169	0.792523
1301.39	0.0456252	0.00478858	0.313159	0.787954
1310.13	0.0443432	0.00464823	0.306857	0.783173
1318.86	0.0430146	0.00450287	0.300299	0.778194
1327.59	0.041652	0.00435392	0.293537	0.773042
1336.33	0.0402627	0.00420222	0.286592	0.7677
1345.06	0.03885	0.00404818	0.279461	0.762148
1353.8	0.037417	0.00389218	0.27215	0.756385
1362.53	0.0359737	0.00373837	0.264689	0.750418
1371.27	0.0345213	0.00358386	0.257086	0.744233
1380	0.0330616	0.00342524	0.249362	0.737836
1388.73	0.0316005	0.00326549	0.241524	0.731199
1397.47	0.0301356	0.0031065	0.233529	0.724242
1406.2	0.0286684	0.00295039	0.225367	0.716966
1414.94	0.0272084	0.00280006	0.217084	0.709392
1423.67	0.0257639	0.00265783	0.208708	0.7015
1432.4	0.0243391	0.00252502	0.200247	0.69326
1441.14	0.0229432	0.00240265	0.191755	0.684722
1449.87	0.0215877	0.00229105	0.183306	0.675921
1458.61	0.0202708	0.00218839	0.17488	0.666757
1467.34	0.0189916	0.00209242	0.166484	0.657243
1476.08	0.0177535	0.00200127	0.158159	0.647402
1484.81	0.0165577	0.00191288	0.149927	0.637209
1493.54	0.0154037	0.00182536	0.141799	0.626661
1502.28	0.0142973	0.00173802	0.133839	0.615842
1511.01	0.0132446	0.00165082	0.126108	0.604811
1519.75	0.0122467	0.00156386	0.118622	0.593549
1528.48	0.0113015	0.00147752	0.111372	0.582035
1537.21	0.0104105	0.00139313	0.104382	0.570331
1545.95	0.0095777	0.00131228	0.0976974	0.558542
1554.68	0.00880934	0.00123663	0.0913878	0.546811
1563.42	0.00810171	0.00116659	0.0854295	0.535062
1572.15	0.00744871	0.00110204	0.0797868	0.523273
1580.89	0.00684794	0.00104285	0.0744647	0.511533
1589.62	0.0062994	0.000988856	0.0694907	0.49996
1598.35	0.00579948	0.000939587	0.0648503	0.48853
1607.09	0.00534024	0.000894023	0.0604862	0.477127
1615.82	0.00491481	0.000851195	0.056352	0.465688
1624.56	0.00452025	0.000810577	0.0524394	0.454255
1633.29	0.00415292	0.000771566	0.0487258	0.442756
1642.02	0.00380973	0.000733958	0.0451893	0.431163
1650.76	0.00348936	0.000697926	0.0418232	0.419459
1659.49	0.00318956	0.000663119	0.0386136	0.407629
1668.23	0.00290903	0.000629119	0.035557	0.395632
1676.96	0.00264484	0.000595121	0.0326331	0.383416
1685.7	0.00239725	0.000561053	0.0298551	0.371048
1694.43	0.00216327	0.00052605	0.0271986	0.35838
1703.16	0.00194355	0.000489857	0.0246861	0.345612
1711.9	0.00173876	0.000452479	0.0223341	0.332805
1720.63	0.00154759	0.000413739	0.0201332	0.319923
1729.37	0.00137	0.000373893	0.01809	0.307106
1738.1	0.00120569	0.000333329	0.0162028	0.294345
1746.83	0.00105284	0.000292203	0.0144498	0.281544
1755.57	0.000911454	0.000251249	0.0128294	0.268775
1764.3	0.000781735	0.000211275	0.011341	0.25608
1773.04	0.00066363	0.00017292	0.00998075	0.243482
1781.77	0.000557179	0.000136636	0.00875006	0.231088
1790.51	0.000461083	0.000102389	0.00763271	0.218744
1799.24	0.000374325	7.01411e-05	0.00661836	0.206457
1807.97	0.000296817	4.01421e-05	0.00570798	0.194337
1816.71	0.000240662	2.48232e-05	0.00491371	0.182494
1825.44	0.000199939	1.86619e-05	0.00422683	0.170991
1834.18	0.000167606	1.51493e-05	0.00363562	0.159909
1842.91	0.00014136	1.2641e-05	0.00313139	0.149324
1851.64	0.000120057	1.06896e-05	0.00270552	0.139314
1860.38	0.000102905	9.14228e-06	0.00234981	0.129954
1869.11	8.91538e-05	7.91112e-06	0.00205425	0.121256
1877.85	7.8138e-05	6.93036e-06	0.00180912	0.113203
1886.58	6.92479e-05	6.14271e-06	0.00160468	0.105731
1895.32	6.20746e-05	5.51015e-06	0.00143441	0.0988419
1904.05	5.6263e-05	5.00019e-06	0.00129204	0.092471
1912.78	5.15249e-05	4.5865e-06	0.00117238	0.0865816
1921.52	4.76411e-05	4.24916e-06	0.00107133	0.0811262
1930.25	4.44159e-05	3.97045e-06	0.000985115	0.0760475
1938.99	4.16721e-05	3.73431e-06	0.000910236	0.0712767
1947.72	3.93272e-05	3.53331e-06	0.000845071	0.0668129
1956.45	0.00136757	0.00133983	0.00208695	0.0639607
1965.19	0.00338968	0.00335158	0.00420941	0.0635056
1973.92	0.00397684	0.00389864	0.00513652	0.0630547
1982.66	0.00434812	0.00422555	0.00588278	0.0628448
1991.39	0.0046494	0.00448519	0.00654004	0.0628434
2000.13	0.00492886	0.00472721	0.0071441	0.0629739
2008.86	0.00507296	0.00483738	0.00758507	0.0630996
2017.59	0.00518871	0.00492383	0.00796029	0.0632359
2026.33	0.00530711	0.0050176	0.00830008	0.0633684
2035.06	0.00539516	0.00508472	0.00857869	0.0634693
2043.8	0.0054645	0.00513641	0.00881073	0.0635189
2052.53	0.00540843	0.00506523	0.00889378	0.0633946
2061.26	0.00512403	0.00476845	0.00872091	0.0629466
2070	0.00499806	0.00463616	0.00865604	0.0624654
2078.73	0.00505009	0.00468635	0.00873317	0.062054
2087.47	0.00498071	0.00461562	0.00868291	0.0615387
2096.2	0.00479558	0.00442998	0.00850669	0.0608594
2104.94	0.00489386	0.00453089	0.00858971	0.0603914
2113.67	0.00492518	0.00456416	0.00861033	0.0599296
2122.4	0.00514455	0.00478598	0.00881658	0.0596827
2131.14	0.00528074	0.00492259	0.00895533	0.059456
2139.87	0.00535433	0.00499495	0.00904363	0.0592375
2148.61	0.00554578	0.00518518	0.00925045	0.0591654
2157.34	0.00579151	0.005429	0.00951814	0.0592134
2166.07	0.00605321	0.00568747	0.0098131	0.0593613
2174.81	0.00639809	0.00602811	0.0102012	0.0596698
2183.54	0.00665833	0.00628198	0.0105217	0.0599971
2192.28	0.00704692	0.00666385	0.0109749	0.0604893
2201.01	0.00767602	0.00728597	0.0116747	0.0612921
2209.75	0.00827507	0.00787508	0.0123701	0.0622244
2218.48	0.00902158	0.00860963	0.0132325	0.0634257
2227.21	0.0100269	0.00960122	0.014373	0.0650179
2235.95	0.0111525	0.0107095	0.0156673	0.0669336
2244.68	0.0122521	0.0117867	0.0169777	0.0690474
2253.42	0.0133645	0.0128724	0.0183378	0.0713533
2262.15	0.0144431	0.0139202	0.0196981	0.0737766
2270.89	0.0155332	0.0149761	0.0210974	0.0763264
2279.62	0.0166075	0.0160131	0.0225054	0.0789579
2288.35	0.017433	0.0167971	0.0236958	0.0814521
2297.09	0.0178966	0.0172149	0.0245529	0.0836579
2305.82	0.0181962	0.0174672	0.025253	0.0856681
2314.56	0.018442	0.0176662	0.0258913	0.0875368
2323.29	0.0186008	0.017779	0.0264312	0.0892284
2332.02	0.0187209	0.0178547	0.0269159	0.0907759
2340.76	0.0188995	0.0179917	0.0274343	0.0922486
2349.49	0.0193764	0.0184316	0.028214	0.0938445
2358.23	0.0201405	0.0191628	0.0292502	0.0955921
2366.96	0.0211768	0.0201693	0.0305348	0.0975094
2375.7	0.0225552	0.0215206	0.0321426	0.0996797
2384.43	0.0243101	0.0232507	0.0341118	0.102145
2393.16	0.0265656	0.025484	0.0365635	0.105008
2401.9	0.0292511	0.0281482	0.0394414	0.108241
2410.63	0.0322606	0.0311357	0.0426486	0.11176
2419.37	0.0356538	0.0345072	0.0462366	0.115574
2428.1	0.0393899	0.0382214	0.0501664	0.119632
2436.83	0.0433487	0.0421576	0.0543192	0.12381
2445.57	0.047571	0.046359	0.0587164	0.128068
2454.3	0.0520594	0.0508298	0.0633463	0.132357
2463.04	0.0568176	0.0555761	0.0681945	0.136626
2471.77	0.061827	0.060582	0.0732199	0.1408
2480.51	0.0671518	0.0659163	0.0784539	0.14486
2489.24	0.0728072	0.0715986	0.0838813	0.148763
2497.97	0.078839	0.0776805	0.0895089	0.152484
2506.71	0.0852033	0.0841225	0.0952645	0.155959
2515.44	0.0919514	0.0909831	0.101157	0.159184
2524.18	0.0992246	0.0984138	0.107264	0.162199
2532.91	0.10711	0.106514	0.113604	0.165003
2541.64	0.115508	0.115193	0.12003	0.167506
2550.38	0.117164	0.116944	0.121023	0.167264
2559.11	0.116927	0.116707	0.120778	0.166925
2567.85	0.116699	0.116479	0.120543	0.1666
2576.58	0.116481	0.116262	0.120318	0.166289
2585.32	0.116274	0.116056	0.120104	0.165994
2594.05	0.116078	0.11586	0.119902	0.165713
2602.78	0.115891	0.115673	0.119708	0.165446
2611.52	0.115711	0.115494	0.119523	0.16519
2620.25	0.115536	0.115319	0.119342	0.16494
2628.99	0.115364	0.115147	0.119164	0.164694
2637.72	0.115192	0.114975	0.118986	0.164448
2646.45	0.115018	0.114802	0.118807	0.1642
2655.19	0.114842	0.114626	0.118625	0.163949
2663.92	0.114664	0.114448	0.118441	0.163694
2672.66	0.114483	0.114267	0.118254	0.163436
2681.39	0.1143	0.114085	0.118065	0.163175
2690.13	0.114117	0.113903	0.117876	0.162914
2698.86	0.113935	0.113721	0.117688	0.162654
2707.59	0.113753	0.113539	0.1175	0.162395
2716.33	0.113573	0.113359	0.117314	0.162137
2725.06	0.113392	0.113179	0.117127	0.161879
2733.8	0.113211	0.112998	0.11694	0.161621
2742.53	0.113028	0.112816	0.116752	0.16136
2751.26	0.112842	0.11263	0.116559	0.161094
2760	0.112652	0.112441	0.116363	0.160823
2768.73	0.112457	0.112246	0.116162	0.160545
2777.47	0.112258	0.112046	0.115955	0.160259
2786.2	0.112054	0.111843	0.115745	0.159968
2794.94	0.111847	0.111637	0.115531	0.159673
2803.67	0.111639	0.111429	0.115316	0.159376
2812.4	0.111431	0.111222	0.115102	0.15908
2821.14	0.111226	0.111017	0.114889	0.158786
2829.87	0.111023	0.110815	0.11468	0.158497
2838.61	0.110825	0.110617	0.114476	0.158214
2847.34	0.110631	0.110423	0.114276	0.157938
2856.07	0.110442	0.110234	0.11408	0.157667
2864.81	0.110256	0.110049	0.113888	0.157402
2873.54	0.110073	0.109866	0.113699	0.15714
2882.28	0.109892	0.109685	0.113512	0.156882
2891.01	0.109712	0.109506	0.113326	0.156625
2899.75	0.109532	0.109326	0.11314	0.156369
2908.48	0.109353	0.109147	0.112955	0.156112
2917.21	0.109173	0.108967	0.112769	0.155855
2925.95	0.108992	0.108787	0.112582	0.155598
2934.68	0.108811	0.108607	0.112395	0.155339
2943.42	0.108629	0.108425	0.112207	0.155079
2952.15	0.108445	0.108241	0.112017	0.154816
2960.88	0.108259	0.108055	0.111825	0.15455
2969.62	0.108069	0.107866	0.111629	0.15428
2978.35	0.107875	0.107673	0.111429	0.154003
2987.09	0.107677	0.107474	0.111224	0.15372
2995.82	0.107473	0.107271	0.111013	0.153428
3004.56	0.107263	0.107061	0.110796	0.153129
3013.29	0.107048	0.106847	0.110574	0.152822
3022.02	0.106829	0.106628	0.110347	0.152509
3030.76	0.106606	0.106405	0.110117	0.152191
3039.49	0.10638	0.10618	0.109885	0.151869
3048.23	0.106155	0.105955	0.109651	0.151547
3056.96	0.105929	0.10573	0.109419	0.151225
3065.69	0.105706	0.105507	0.109187	0.150906
3074.43	0.105484	0.105286	0.108959	0.15059
3083.16	0.105265	0.105067	0.108733	0.150277
3091.9	0.105049	0.104852	0.108509	0.149969
3100.63	0.104835	0.104638	0.108288	0.149663
3109.37	0.104623	0.104426	0.108069	0.14936
3118.1	0.104412	0.104215	0.107851	0.149058
3126.83	0.104201	0.104005	0.107634	0.148758
3135.57	0.103991	0.103796	0.107417	0.148459
3144.3	0.103783	0.103587	0.107201	0.14816
3153.04	0.103575	0.10338	0.106986	0.147864
3161.77	0.103369	0.103174	0.106773	0.147569
3170.5	0.103165	0.102971	0.106563	0.147278
3179.24	0.102965	0.102771	0.106356	0.146993
3187.97	0.102768	0.102575	0.106153	0.146712
3196.71	0.102576	0.102383	0.105955	0.146438
3205.44	0.102389	0.102197	0.105762	0.146171
3214.18	0.102206	0.102014	0.105573	0.14591
3222.91	0.102028	0.101836	0.105389	0.145655
3231.64	0.101853	0.101661	0.105208	0.145405
3240.38	0.10168	0.101489	0.10503	0.145159
3249.11	0.10151	0.101319	0.104853	0.144916
3257.85	0.10134	0.101149	0.104678	0.144673
3266.58	0.10117	0.10098	0.104502	0.14443
3275.32	0.100999	0.100809	0.104325	0.144186
3284.05	0.100826	0.100636	0.104147	0.143939
3292.78	0.10065	0.100461	0.103965	0.143688
3301.52	0.100471	0.100282	0.10378	0.143432
3310.25	0.100287	0.100099	0.103591	0.143171
3318.99	0.1001	0.0999118	0.103397	0.142903
3327.72	0.0999086	0.0997207	0.1032	0.14263
3336.45	0.099713	0.0995255	0.102997	0.142351
3345.19	0.0995132	0.0993261	0.102791	0.142065
3353.92	0.0993102	0.0991235	0.102581	0.141776
3362.66	0.0991047	0.0989184	0.102369	0.141482
3371.39	0.098898	0.098712	0.102156	0.141187
3380.13	0.0986916	0.098506	0.101942	0.140892
3388.86	0.0984872	0.098302	0.101731	0.140601
3397.59	0.0982859	0.0981011	0.101523	0.140313
3406.33	0.0980894	0.0979049	0.10132	0.140033
3415.06	0.0978987	0.0977146	0.101123	0.13976
3423.8	0.0977144	0.0975307	0.100933	0.139497
3432.53	0.0975368	0.0973534	0.10075	0.139244
3441.26	0.0973654	0.0971823	0.100573	0.138999
3450	0.0971995	0.0970167	0.100401	0.138762
3458.73	0.0970381	0.0968557	0.100235	0.138532
3467.47	0.0968797	0.0966976	0.100071	0.138306
3476.2	0.0967229	0.096541	0.0999089	0.138082
3484.94	0.0965662	0.0963846	0.099747	0.137858
3493.67	0.0964086	0.0962273	0.0995842	0.137633
3502.4	0.0962496	0.0960686	0.09942	0.137406
3511.14	0.0960887	0.095908	0.0992538	0.137177
3519.87	0.0959258	0.0957454	0.0990855	0.136944
3528.61	0.0957609	0.0955808	0.0989152	0.136709
3537.34	0.0955941	0.0954144	0.098743	0.136471
3546.07	0.0954257	0.0952463	0.098569	0.13623
3554.81	0.0952555	0.0950763	0.0983931	0.135987
3563.54	0.0950828	0.094904	0.0982148	0.135741
3572.28	0.0949074	0.0947289	0.0980336	0.13549
3581.01	0.0947284	0.0945503	0.0978488	0.135235
3589.75	0.0945454	0.0943677	0.0976597	0.134973
3598.48	0.094358	0.0941806	0.0974661	0.134706
3607.21	0.0941659	0.0939888	0.0972677	0.134432
3615.95	0.0939694	0.0937927	0.0970647	0.134151
3624.68	0.0937694	0.093593	0.0968581	0.133865
3633.42	0.093567	0.0933911	0.0966491	0.133577
3642.15	0.0933638	0.0931883	0.0964392	0.133287
3650.88	0.0931613	0.0929862	0.09623	0.132997
3659.62	0.0929609	0.0927861	0.096023	0.132711
3668.35	0.0927635	0.0925891	0.0958191	0.132429
3677.09	0.0925695	0.0923954	0.0956187	0.132153
3685.82	0.0923784	0.0922047	0.0954213	0.13188
3694.56	0.0921893	0.092016	0.095226	0.13161
3703.29	0.0920007	0.0918277	0.0950312	0.131341
3712.02	0.091811	0.0916384	0.0948352	0.13107
3720.76	0.0916185	0.0914462	0.0946364	0.130795
3729.49	0.0914218	0.0912499	0.0944332	0.130514
3738.23	0.09122	0.0910485	0.0942248	0.130226
3746.96	0.0910133	0.0908422	0.0940113	0.129931
3755.69	0.0908024	0.0906317	0.0937934	0.12963
3764.43	0.0905888	0.0904184	0.0935727	0.129325
3773.16	0.0903747	0.0902048	0.0933516	0.129019
3781.9	0.0901626	0.0899931	0.0931326	0.128717
3790.63	0.0899553	0.0897862	0.0929184	0.128421
3799.37	0.089755	0.0895862	0.0927115	0.128135
3808.1	0.0895635	0.089395	0.0925136	0.127861
3816.83	0.0893819	0.0892139	0.0923261	0.127602
3825.57	0.0892111	0.0890434	0.0921497	0.127358
3834.3	0.0890508	0.0888833	0.0919841	0.127129
3843.04	0.0889003	0.0887331	0.0918286	0.126914
3851.77	0.0887584	0.0885915	0.0916821	0.126712
3860.5	0.088624	0.0884573	0.0915432	0.12652
3869.24	0.0884955	0.0883291	0.0914105	0.126337
3877.97	0.0883716	0.0882054	0.0912825	0.12616
3886.71	0.0882512	0.0880852	0.0911582	0.125988
3895.44	0.0881332	0.0879675	0.0910363	0.125819
3904.18	0.088017	0.0878515	0.0909162	0.125653
3912.91	0.0879019	0.0877366	0.0907974	0.125489
3921.64	0.0877873	0.0876223	0.090679	0.125326
3930.38	0.0876727	0.0875078	0.0905606	0.125162
3939.11	0.0875575	0.0873929	0.0904416	0.124997
3947.85	0.0874415	0.087277	0.0903218	0.124832
3956.58	0.0873242	0.08716	0.0902007	0.124664
3965.31	0.0872056	0.0870416	0.0900781	0.124495
3974.05	0.0870853	0.0869216	0.0899539	0.124323
3982.78	0.0869639	0.0868004	0.0898285	0.12415
3991.52	0.0868418	0.0866785	0.0897023	0.123976
4000.25	0.0867193	0.0865562	0.0895758	0.123801
4008.99	0.0865972	0.0864344	0.0894497	0.123627
4017.72	0.0864764	0.0863138	0.0893249	0.123454
4026.45	0.0863574	0.0861951	0.089202	0.123284
4035.19	0.0862408	0.0860786	0.0890815	0.123118
4043.92	0.0861264	0.0859645	0.0889634	0.122954
4052.66	0.0860146	0.0858528	0.0888478	0.122795
4061.39	0.0859049	0.0857434	0.0887346	0.122638
4070.12	0.0857969	0.0856355	0.088623	0.122484
4078.86	0.0856896	0.0855285	0.0885122	0.122331
4087.59	0.0855822	0.0854213	0.0884013	0.122178
4096.33	0.0854739	0.0853132	0.0882894	0.122023
4105.06	0.0853639	0.0852034	0.0881757	0.121866
4113.8	0.0852516	0.0850912	0.0880597	0.121705
4122.53	0.0851369	0.0849768	0.0879412	0.121542
4131.26	0.0850198	0.0848599	0.0878203	0.121375
4140	0.0849006	0.0847409	0.0876972	0.121204
4148.73	0.0847797	0.0846203	0.0875723	0.121032
4157.47	0.0846578	0.0844987	0.0874464	0.120858
4166.2	0.0845357	0.0843768	0.0873203	0.120683
4174.93	0.0844143	0.0842556	0.0871949	0.12051
4183.67	0.0842944	0.0841359	0.087071	0.120339
4192.4	0.0841765	0.0840182	0.0869492	0.120171
4201.14	0.0840613	0.0839032	0.0868302	0.120006
4209.87	0.0839489	0.0837911	0.0867142	0.119846
4218.61	0.0838394	0.0836817	0.086601	0.119689
4227.34	0.0837326	0.0835751	0.0864907	0.119537
4236.07	0.0836281	0.0834708	0.0863828	0.119388
4244.81	0.0835254	0.0833683	0.0862767	0.119241
4253.54	0.0834239	0.083267	0.0861719	0.119096
4262.28	0.0833232	0.0831665	0.0860678	0.118952
4271.01	0.083223	0.0830665	0.0859644	0.118809
4279.74	0.0831231	0.0829668	0.0858612	0.118667
4288.48	0.0830235	0.0828674	0.0857583	0.118525
4297.21	0.0829246	0.0827687	0.0856561	0.118384
4305.95	0.0828269	0.0826712	0.0855552	0.118244
4314.68	0.082731	0.0825755	0.0854562	0.118107
4323.42	0.0826378	0.0824824	0.0853599	0.117974
4332.15	0.0825479	0.0823927	0.085267	0.117846
4340.88	0.082462	0.0823069	0.0851782	0.117723
4349.62	0.0823803	0.0822254	0.0850939	0.117606
4358.35	0.0823027	0.0821479	0.0850137	0.117496
4367.09	0.0822288	0.0820742	0.0849374	0.11739
4375.82	0.0821581	0.0820037	0.0848644	0.117289
4384.56	0.0820898	0.0819354	0.0847938	0.117192
4393.29	0.0820228	0.0818686	0.0847246	0.117096
4402.02	0.0819562	0.0818021	0.0846558	0.117001
4410.76	0.081889	0.081735	0.0845864	0.116905
4419.49	0.0818205	0.0816667	0.0845156	0.116807
4428.23	0.0817502	0.0815965	0.084443	0.116707
4436.96	0.0816778	0.0815242	0.0843683	0.116604
4445.69	0.0816034	0.08145	0.0842914	0.116497
4454.43	0.081527	0.0813737	0.0842125	0.116388
4463.16	0.0814489	0.0812957	0.0841318	0.116277
4471.9	0.0813692	0.0812162	0.0840495	0.116163
4480.63	0.0812881	0.0811353	0.0839657	0.116047
4489.37	0.0812056	0.0810529	0.0838805	0.115929
4498.1	0.0811218	0.0809692	0.0837939	0.11581
4506.83	0.0810363	0.0808839	0.0837056	0.115688
4515.57	0.0809493	0.0807971	0.0836157	0.115563
4524.3	0.0808604	0.0807084	0.083524	0.115437
4533.04	0.0807697	0.0806178	0.0834302	0.115307
4541.77	0.0806772	0.0805255	0.0833347	0.115175
4550.5	0.0805832	0.0804317	0.0832376	0.115041
4559.24	0.080488	0.0803367	0.0831393	0.114905
4567.97	0.0803919	0.0802408	0.08304	0.114768
4576.71	0.0802954	0.0801444	0.0829402	0.11463
4585.44	0.0801986	0.0800478	0.0828403	0.114492
4594.18	0.0801018	0.0799511	0.0827403	0.114354
4602.91	0.080005	0.0798545	0.0826403	0.114215
4611.64	0.0799082	0.0797579	0.0825403	0.114077
4620.38	0.0798112	0.0796611	0.0824401	0.113939
4629.11	0.0797137	0.0795638	0.0823394	0.1138
4637.85	0.0796158	0.0794661	0.0822383	0.11366
4646.58	0.0795176	0.0793681	0.0821369	0.11352
4655.31	0.0794194	0.0792701	0.0820354	0.113379
4664.05	0.0793216	0.0791725	0.0819345	0.11324
4672.78	0.079225	0.079076	0.0818347	0.113102
4681.52	0.0791304	0.0789816	0.0817369	0.112967
4690.25	0.0790385	0.0788899	0.081642	0.112836
4698.99	0.0789503	0.0788018	0.0815509	0.11271
4707.72	0.0788662	0.0787179	0.0814641	0.11259
4716.45	0.0787866	0.0786384	0.0813818	0.112476
4725.19	0.0787112	0.0785632	0.0813039	0.112368
4733.92	0.0786396	0.0784917	0.08123	0.112266
4742.66	0.0785712	0.0784234	0.0811593	0.112168
4751.39	0.0785049	0.0783573	0.0810908	0.112074
4760.12	0.0784398	0.0782923	0.0810236	0.111981
4768.86	0.0783749	0.0782276	0.0809566	0.111888
4777.59	0.0783095	0.0781623	0.080889	0.111795
4786.33	0.0782431	0.078096	0.0808204	0.1117
4795.06	0.0781755	0.0780285	0.0807506	0.111604
4803.8	0.0781069	0.07796	0.0806797	0.111506
4812.53	0.0780376	0.0778908	0.0806081	0.111407
4821.26	0.077968	0.0778214	0.0805362	0.111307
4830	0.077899	0.0777525	0.080465	0.111209
4838.73	0.0778312	0.0776848	0.0803949	0.111112
4847.47	0.0777651	0.0776188	0.0803266	0.111018
4856.2	0.077701	0.0775549	0.0802604	0.110926
4864.93	0.0776391	0.0774931	0.0801965	0.110838
4873.67	0.0775795	0.0774336	0.080135	0.110753
4882.4	0.0775223	0.0773766	0.0800759	0.110671
4891.14	0.0774674	0.0773217	0.0800192	0.110593
4899.87	0.0774146	0.077269	0.0799646	0.110517
4908.61	0.0773639	0.0772184	0.0799123	0.110445
4917.34	0.0773153	0.0771699	0.079862	0.110376
4926.07	0.0772687	0.0771234	0.0798139	0.110309
4934.81	0.0772241	0.0770789	0.0797678	0.110245
4943.54	0.0771815	0.0770363	0.0797238	0.110185
4952.28	0.0771406	0.0769956	0.0796816	0.110126
4961.01	0.0771014	0.0769565	0.0796411	0.11007
4969.74	0.0770633	0.0769184	0.0796018	0.110016
4978.48	0.0770258	0.076881	0.079563	0.109962
4987.21	0.0769882	0.0768435	0.0795242	0.109909
4995.95	0.07695	0.0768054	0.0794848	0.109854
5004.68	0.0769106	0.076766	0.0794441	0.109798
5013.42	0.0768696	0.0767251	0.0794017	0.109739
5022.15	0.0768268	0.0766823	0.0793574	0.109678
5030.88	0.0767822	0.0766378	0.0793114	0.109615
5039.62	0.0767363	0.076592	0.0792639	0.109549
5048.35	0.0766894	0.0765452	0.0792156	0.109482
5057.09	0.0766424	0.0764983	0.079167	0.109415
5065.82	0.076596	0.076452	0.079119	0.109349
5074.55	0.0765508	0.0764069	0.0790724	0.109284
5083.29	0.0765076	0.0763637	0.0790277	0.109223
5092.02	0.0764667	0.0763229	0.0789855	0.109164
5100.76	0.0764285	0.0762848	0.078946	0.10911
5109.49	0.0763928	0.0762491	0.0789091	0.109059
5118.23	0.0763594	0.0762158	0.0788746	0.109011
5126.96	0.0763277	0.0761842	0.0788419	0.108966
5135.69	0.0762973	0.0761538	0.0788105	0.108922
5144.43	0.0762675	0.076124	0.0787797	0.10888
5153.16	0.0762377	0.0760944	0.078749	0.108837
5161.9	0.0762078	0.0760645	0.078718	0.108794
5170.63	0.0761772	0.076034	0.0786865	0.108751
5179.36	0.076146	0.0760028	0.0786542	0.108706
5188.1	0.0761142	0.075971	0.0786213	0.108661
5196.83	0.0760818	0.0759387	0.0785879	0.108615
5205.57	0.0760491	0.0759061	0.0785541	0.108568
5214.3	0.0760164	0.0758735	0.0785204	0.108521
5223.04	0.075984	0.0758412	0.0784869	0.108475
5231.77	0.075952	0.0758092	0.0784538	0.108429
5240.5	0.0759204	0.0757777	0.0784212	0.108384
5249.24	0.0758894	0.0757466	0.0783891	0.10834
5257.97	0.0758587	0.0757161	0.0783575	0.108296
5266.71	0.0758286	0.075686	0.0783263	0.108253
5275.44	0.0757988	0.0756562	0.0782956	0.108211
5284.17	0.0757693	0.0756268	0.0782651	0.108169
5292.91	0.0757402	0.0755978	0.0782351	0.108127
5301.64	0.0757115	0.0755691	0.0782054	0.108086
5310.38	0.0756833	0.075541	0.0781763	0.108046
5319.11	0.0756558	0.0755136	0.0781479	0.108006
5327.85	0.0756292	0.075487	0.0781204	0.107968
5336.58	0.0756035	0.0754613	0.0780938	0.107932
5345.31	0.0755786	0.0754365	0.0780682	0.107896
5354.05	0.0755548	0.0754127	0.0780435	0.107862
5362.78	0.0755316	0.0753896	0.0780196	0.107829
5371.52	0.075509	0.075367	0.0779962	0.107797
5380.25	0.0754868	0.0753448	0.0779733	0.107765
5388.98	0.0754647	0.0753228	0.0779505	0.107734
5397.72	0.0754425	0.0753006	0.0779275	0.107702
5406.45	0.07542	0.0752782	0.0779043	0.10767
5415.19	0.0753971	0.0752554	0.0778807	0.107637
5423.92	0.0753738	0.0752321	0.0778566	0.107604
5432.66	0.0753501	0.0752084	0.0778321	0.10757
5441.39	0.0753261	0.0751844	0.0778073	0.107536
5450.12	0.0753018	0.0751602	0.0777822	0.107501
5458.86	0.0752773	0.0751358	0.0777569	0.107466
5467.59	0.0752528	0.0751113	0.0777316	0.107431
5476.33	0.0752281	0.0750867	0.0777061	0.107396
5485.06	0.0752032	0.0750618	0.0776804	0.10736
5493.8	0.075178	0.0750366	0.0776543	0.107324
5502.53	0.0751523	0.075011	0.0776278	0.107288
5511.26	0.0751261	0.0749848	0.0776007	0.10725
5520	0.0750992	0.074958	0.077573	0.107212
5528.73	0.0750717	0.0749305	0.0775445	0.107173
5537.47	0.0750436	0.0749024	0.0775155	0.107132
5546.2	0.0750149	0.0748738	0.0774859	0.107092
5554.93	0.0749859	0.0748449	0.0774559	0.10705
5563.67	0.0749569	0.0748159	0.0774259	0.107009
5572.4	0.074928	0.0747872	0.0773961	0.106968
5581.14	0.0748995	0.0747587	0.0773667	0.106927
5589.87	0.0748714	0.0747306	0.0773376	0.106887
5598.61	0.0748437	0.074703	0.077309	0.106847
5607.34	0.0748164	0.0746757	0.0772808	0.106808
5616.07	0.0747892	0.0746486	0.0772528	0.106769
5624.81	0.074762	0.0746215	0.0772247	0.106731
5633.54	0.0747345	0.074594	0.0771962	0.106691
5642.28	0.0747064	0.0745659	0.0771672	0.106651
5651.01	0.0746776	0.0745371	0.0771374	0.10661
5659.74	0.0746479	0.0745075	0.0771067	0.106568
5668.48	0.0746174	0.074477	0.0770752	0.106524
5677.21	0.0745861	0.0744458	0.0770429	0.106479
5685.95	0.0745541	0.0744139	0.0770099	0.106434
5694.68	0.0745217	0.0743816	0.0769764	0.106387
5703.42	0.0744889	0.0743488	0.0769425	0.106341
5712.15	0.0744559	0.0743159	0.0769085	0.106294
5720.88	0.0744228	0.0742829	0.0768743	0.106246
5729.62	0.0743895	0.0742496	0.0768399	0.106199
5738.35	0.074356	0.0742162	0.0768052	0.106151
5747.09	0.0743221	0.0741824	0.0767703	0.106102
5755.82	0.0742877	0.074148	0.0767347	0.106053
5764.55	0.0742527	0.074113	0.0766985	0.106003
5773.29	0.0742169	0.0740774	0.0766616	0.105952
5782.02	0.0741806	0.0740411	0.076624	0.1059
5790.76	0.0741436	0.0740042	0.0765859	0.105848
5799.49	0.0741061	0.0739668	0.0765472	0.105794
5808.23	0.0740684	0.0739291	0.0765082	0.10574
5816.96	0.0740306	0.0738914	0.0764691	0.105686
5825.69	0.0739929	0.0738537	0.0764302	0.105632
5834.43	0.0739554	0.0738163	0.0763914	0.105579
5843.16	0.0739182	0.0737792	0.076353	0.105526
5851.9	0.0738812	0.0737423	0.0763149	0.105473
5860.63	0.0738446	0.0737057	0.076277	0.105421
5869.36	0.0738081	0.0736693	0.0762393	0.105369
5878.1	0.0737718	0.073633	0.0762018	0.105317
5886.83	0.0737356	0.0735969	0.0761644	0.105265
5895.57	0.0736997	0.0735611	0.0761273	0.105214
5904.3	0.0736642	0.0735256	0.0760906	0.105163
5913.04	0.0736293	0.0734908	0.0760546	0.105113
5921.77	0.0735953	0.073457	0.0760195	0.105065
5930.5	0.0735626	0.0734243	0.0759858	0.105018
5939.24	0.0735315	0.0733932	0.0759536	0.104974
5947.97	0.0735021	0.0733639	0.0759232	0.104932
5956.71	0.0734745	0.0733364	0.0758948	0.104893
5965.44	0.0734488	0.0733107	0.0758682	0.104856
5974.17	0.0734248	0.0732868	0.0758434	0.104822
5982.91	0.0734023	0.0732643	0.0758201	0.104789
5991.64	0.0733809	0.0732429	0.075798	0.104759
6000.38	0.0733603	0.0732223	0.0757767	0.104729
6009.11	0.0733402	0.0732023	0.075756	0.104701
6017.85	0.0733203	0.0731825	0.0757355	0.104672
6026.58	0.0733006	0.0731627	0.0757151	0.104644
6035.31	0.0732808	0.073143	0.0756946	0.104616
6044.05	0.073261	0.0731232	0.0756742	0.104588
6052.78	0.0732413	0.0731036	0.0756539	0.10456
6061.52	0.0732219	0.0730842	0.0756338	0.104532
6070.25	0.0732028	0.0730652	0.0756141	0.104505
6078.98	0.0731842	0.0730466	0.0755948	0.104478
6087.72	0.073166	0.0730285	0.0755761	0.104452
6096.45	0.0731483	0.0730108	0.0755578	0.104427
6105.19	0.0731309	0.0729934	0.0755398	0.104402
6113.92	0.0731138	0.0729763	0.0755221	0.104378
6122.66	0.0730969	0.0729594	0.0755046	0.104353
6131.39	0.07308	0.0729425	0.0754872	0.104329
6140.12	0.073063	0.0729257	0.0754697	0.104305
6148.86	0.0730461	0.0729087	0.0754522	0.104281
6157.59	0.0730291	0.0728918	0.0754347	0.104257
6166.33	0.0730124	0.0728751	0.0754174	0.104233
6175.06	0.0729958	0.0728586	0.0754003	0.104209
6183.79	0.0729797	0.0728425	0.0753836	0.104186
6192.53	0.0729641	0.0728269	0.0753675	0.104164
6201.26	0.0729489	0.0728117	0.0753518	0.104142
6210	0.0729343	0.0727971	0.0753367	0.104121
6218.73	0.0729201	0.0727829	0.075322	0.104101
6227.47	0.0729062	0.0727691	0.0753077	0.104081
6236.2	0.0728926	0.0727555	0.0752936	0.104062
6244.93	0.0728789	0.0727419	0.0752795	0.104042
6253.67	0.0728652	0.0727282	0.0752654	0.104023
6262.4	0.0728514	0.0727145	0.0752511	0.104003
6271.14	0.0728375	0.0727006	0.0752368	0.103983
6279.87	0.0728235	0.0726865	0.0752223	0.103963
6288.6	0.0728094	0.0726725	0.0752077	0.103943
6297.34	0.0727955	0.0726586	0.0751933	0.103923
6306.07	0.0727818	0.072645	0.0751792	0.103904
6314.81	0.0727685	0.0726317	0.0751655	0.103885
6323.54	0.0727556	0.0726188	0.0751522	0.103866
6332.28	0.0727432	0.0726065	0.0751394	0.103848
6341.01	0.0727313	0.0725946	0.0751271	0.103831
6349.74	0.0727198	0.0725831	0.0751152	0.103815
6358.48	0.0727087	0.072572	0.0751037	0.103799
6367.21	0.0726979	0.0725612	0.0750925	0.103784
6375.95	0.0726872	0.0725506	0.0750815	0.103769
6384.68	0.0726767	0.07254	0.0750706	0.103753
6393.41	0.0726662	0.0725296	0.0750598	0.103739
6402.15	0.0726558	0.0725191	0.075049	0.103724
6410.88	0.0726453	0.0725087	0.0750383	0.103709
6419.62	0.072635	0.0724984	0.0750276	0.103694
6428.35	0.0726248	0.0724882	0.075017	0.103679
6437.09	0.0726146	0.0724781	0.0750065	0.103665
6445.82	0.0726047	0.0724682	0.0749963	0.103651
6454.55	0.0725949	0.0724584	0.0749861	0.103637
6463.29	0.0725852	0.0724487	0.0749761	0.103623
6472.02	0.0725757	0.0724392	0.0749663	0.103609
6480.76	0.0725663	0.0724298	0.0749566	0.103596
6489.49	0.0725569	0.0724205	0.0749469	0.103583
6498.22	0.0725476	0.0724112	0.0749373	0.103569
6506.96	0.0725383	0.0724019	0.0749277	0.103556
6515.69	0.072529	0.0723926	0.074918	0.103543
6524.43	0.0725195	0.0723832	0.0749083	0.103529
6533.16	0.07251	0.0723737	0.0748985	0.103516
6541.9	0.0725004	0.0723641	0.0748885	0.103502
6550.63	0.0724907	0.0723543	0.0748785	0.103488
6559.36	0.0724808	0.0723445	0.0748683	0.103474
6568.1	0.0724708	0.0723345	0.074858	0.10346
6576.83	0.0724607	0.0723244	0.0748475	0.103445
6585.57	0.0724504	0.0723142	0.0748369	0.10343
6594.3	0.07244	0.0723038	0.0748262	0.103416
6603.04	0.0724296	0.0722934	0.0748154	0.103401
6611.77	0.072419	0.0722828	0.0748044	0.103386
6620.5	0.0724082	0.0722721	0.0747933	0.10337
6629.24	0.0723974	0.0722613	0.0747822	0.103355
6637.97	0.0723865	0.0722504	0.0747709	0.103339
6646.71	0.0723753	0.0722392	0.0747593	0.103323
6655.44	0.0723639	0.0722278	0.0747475	0.103307
6664.17	0.0723522	0.0722162	0.0747355	0.10329
6672.91	0.0723402	0.0722041	0.074723	0.103273
6681.64	0.0723277	0.0721917	0.0747102	0.103255
6690.38	0.0723148	0.0721788	0.0746968	0.103237
6699.11	0.0723014	0.0721654	0.074683	0.103218
6707.85	0.0722875	0.0721515	0.0746686	0.103198
6716.58	0.0722731	0.0721372	0.0746538	0.103177
6725.31	0.0722583	0.0721224	0.0746385	0.103156
6734.05	0.0722431	0.0721072	0.0746228	0.103134
6742.78	0.0722276	0.0720918	0.0746067	0.103112
6751.52	0.0722119	0.0720761	0.0745905	0.10309
6760.25	0.072196	0.0720602	0.0745741	0.103067
6768.98	0.0721801	0.0720444	0.0745577	0.103045
6777.72	0.0721642	0.0720285	0.0745412	0.103022
6786.45	0.0721483	0.0720127	0.0745249	0.102999
6795.19	0.0721326	0.071997	0.0745086	0.102977
6803.92	0.0721171	0.0719814	0.0744926	0.102955
6812.66	0.0721018	0.0719662	0.0744768	0.102933
6821.39	0.0720868	0.0719512	0.0744613	0.102911
6830.12	0.0720721	0.0719365	0.0744461	0.10289
6838.86	0.0720577	0.0719222	0.0744312	0.10287
6847.59	0.0720437	0.0719082	0.0744168	0.10285
6856.33	0.0720302	0.0718947	0.0744028	0.10283
6865.06	0.0720171	0.0718817	0.0743893	0.102812
6873.79	0.0720044	0.071869	0.0743762	0.102794
6882.53	0.0719922	0.0718569	0.0743636	0.102776
6891.26	0.0719804	0.0718451	0.0743514	0.102759
6900	0.0719689	0.0718336	0.0743395	0.102743
6908.73	0.0719576	0.0718223	0.0743278	0.102727
6917.47	0.0719464	0.0718111	0.0743162	0.102711
6926.2	0.0719352	0.0717999	0.0743047	0.102695
6934.93	0.071924	0.0717888	0.0742932	0.102679
6943.67	0.0719129	0.0717777	0.0742817	0.102663
6952.4	0.0719017	0.0717665	0.0742702	0.102647
6961.14	0.0718906	0.0717554	0.0742586	0.102631
6969.87	0.0718793	0.0717442	0.074247	0.102615
6978.6	0.071868	0.0717328	0.0742353	0.102599

## Sheet: d
Time (s)	NH3 (base case)	NH3 (2*water)	NH3 (0.5*water)
0	1	1	1
8.73417	0.999958	0.999958	0.999958
17.4683	0.999954	0.999954	0.999954
26.2025	0.999951	0.999951	0.999951
34.9367	0.999951	0.999951	0.999951
43.6709	0.999953	0.999953	0.999953
52.405	0.999956	0.999956	0.999956
61.1392	0.999959	0.999959	0.999959
69.8734	0.999964	0.999964	0.999964
78.6076	0.99997	0.99997	0.99997
87.3417	0.999977	0.999977	0.999977
96.0759	0.999983	0.999983	0.999983
104.81	0.999989	0.999989	0.999989
113.544	0.999992	0.999992	0.999992
122.278	0.999994	0.999994	0.999994
131.013	0.999995	0.999995	0.999995
139.747	0.999995	0.999995	0.999995
148.481	0.999996	0.999996	0.999996
157.215	0.999997	0.999997	0.999997
165.949	1	1	1
174.683	1	1	1
183.418	1.00001	1.00001	1.00001
192.152	1.00001	1.00001	1.00001
200.886	1.00002	1.00002	1.00002
209.62	1.00002	1.00002	1.00002
218.354	1.00002	1.00002	1.00002
227.089	1.00003	1.00003	1.00003
235.823	1.00003	1.00003	1.00003
244.557	1.00003	1.00003	1.00003
253.291	1.00002	1.00002	1.00002
262.025	1.00002	1.00002	1.00002
270.759	1.00002	1.00002	1.00002
279.494	1.00003	1.00003	1.00003
288.228	1.00003	1.00003	1.00003
296.962	1.00003	1.00003	1.00003
305.696	1.00004	1.00004	1.00004
314.43	1.00004	1.00004	1.00004
323.164	1.00005	1.00005	1.00005
331.899	1.00005	1.00005	1.00005
340.633	1.00005	1.00005	1.00005
349.367	1.00005	1.00005	1.00005
358.101	1.00004	1.00004	1.00004
366.835	1.00004	1.00004	1.00004
375.569	1.00003	1.00003	1.00003
384.304	1.00003	1.00003	1.00003
393.038	1.00003	1.00003	1.00003
401.772	1.00003	1.00003	1.00003
410.506	1.00003	1.00003	1.00003
419.24	1.00003	1.00003	1.00003
427.974	1.00004	1.00004	1.00004
436.709	1.00005	1.00005	1.00005
445.443	1.00006	1.00006	1.00006
454.177	1.00006	1.00006	1.00006
462.911	0.999977	0.99989	1.00002
471.645	0.999185	0.998305	0.999625
480.38	0.997176	0.994296	0.998619
489.114	0.993421	0.986825	0.996734
497.848	0.987377	0.974861	0.993695
506.582	0.978548	0.957515	0.989238
515.316	0.966513	0.934127	0.983131
524.05	0.950951	0.904336	0.975176
532.785	0.931673	0.868139	0.965227
541.519	0.908632	0.825918	0.953191
550.253	0.881942	0.778444	0.93904
558.987	0.851868	0.726814	0.92281
567.721	0.818802	0.672346	0.904592
576.455	0.783228	0.61646	0.88452
585.19	0.745684	0.560547	0.862758
593.924	0.706722	0.505871	0.839484
602.658	0.666894	0.453518	0.814889
611.392	0.626735	0.40435	0.789171
620.126	0.586739	0.358988	0.762525
628.86	0.54735	0.31781	0.735141
637.595	0.508968	0.280988	0.707213
646.329	0.471951	0.248521	0.678939
655.063	0.436597	0.220252	0.650512
663.797	0.403136	0.195896	0.622112
672.531	0.371743	0.175099	0.593918
681.266	0.342536	0.157462	0.566098
690	0.315569	0.142564	0.538803
698.734	0.290846	0.129997	0.51217
707.468	0.268327	0.119381	0.48632
716.202	0.247932	0.110377	0.461357
724.936	0.229551	0.102688	0.437364
733.671	0.213052	0.0960663	0.41441
742.405	0.198291	0.0903089	0.392547
751.139	0.185115	0.0852534	0.371812
759.873	0.17337	0.0807704	0.352225
768.607	0.162904	0.0767582	0.333793
777.341	0.153572	0.0731375	0.316505
786.076	0.145237	0.0698469	0.300344
794.81	0.137773	0.0668379	0.285277
803.544	0.131065	0.0640679	0.27126
812.278	0.125005	0.0615027	0.258238
821.012	0.119502	0.0591161	0.246155
829.746	0.114481	0.0568881	0.234953
838.481	0.109874	0.054802	0.22457
847.215	0.105628	0.0528445	0.214949
855.949	0.101698	0.0510054	0.206033
864.683	0.0980498	0.0492773	0.197769
873.417	0.0946543	0.0476537	0.190109
882.152	0.0914876	0.046128	0.183006
890.886	0.0885294	0.044694	0.176417
899.62	0.0857629	0.0433465	0.170301
908.354	0.0831758	0.0420824	0.164624
917.088	0.080757	0.0408979	0.159354
925.822	0.0784955	0.039788	0.154461
934.557	0.0763806	0.038748	0.149915
943.291	0.0744036	0.0377744	0.145692
952.025	0.072559	0.0368656	0.141771
960.759	0.0708444	0.0360219	0.138137
969.493	0.0692575	0.0352422	0.134777
978.227	0.0677966	0.034526	0.13168
986.962	0.0664594	0.0338716	0.128839
995.696	0.065242	0.0332761	0.126242
1004.43	0.0641402	0.0327367	0.123881
1013.16	0.0631503	0.0322509	0.121747
1021.9	0.0622684	0.0318161	0.119832
1030.63	0.0614879	0.0314271	0.118125
1039.37	0.0608019	0.0310793	0.116615
1048.1	0.0602039	0.0307681	0.11529
1056.83	0.0596847	0.0304867	0.114137
1065.57	0.0592379	0.0302311	0.113145
1074.3	0.0588561	0.0299956	0.112302
1083.04	0.0585317	0.0297745	0.111596
1091.77	0.0582571	0.029562	0.111015
1100.51	0.0580231	0.029351	0.110546
1109.24	0.0578208	0.0291353	0.110177
1117.97	0.057643	0.02891	0.109895
1126.71	0.0574815	0.028669	0.109689
1135.44	0.0573254	0.0284045	0.109544
1144.18	0.0571583	0.0281056	0.109439
1152.91	0.0569688	0.0277673	0.109356
1161.65	0.056751	0.0273881	0.109282
1170.38	0.0564998	0.0269659	0.109207
1179.11	0.0562074	0.0264969	0.10912
1187.85	0.0558681	0.0259794	0.109009
1196.58	0.0554801	0.0254152	0.10887
1205.32	0.0550385	0.0248025	0.108694
1214.05	0.0545366	0.0241401	0.108471
1222.78	0.0539714	0.0234304	0.108192
1231.52	0.0533403	0.0226756	0.107853
1240.25	0.0526398	0.0218779	0.107443
1248.99	0.0518687	0.021042	0.106958
1257.72	0.0510265	0.0201724	0.10639
1266.46	0.050104	0.019269	0.105724
1275.19	0.0490978	0.018338	0.104945
1283.92	0.0480113	0.0173882	0.104048
1292.66	0.0468511	0.0164287	0.103031
1301.39	0.0456252	0.0154682	0.101896
1310.13	0.0443432	0.0145151	0.100647
1318.86	0.0430146	0.0135765	0.0992917
1327.59	0.041652	0.0126601	0.0978428
1336.33	0.0402627	0.0117696	0.0963083
1345.06	0.03885	0.0109069	0.094691
1353.8	0.037417	0.0100745	0.0929926
1362.53	0.0359737	0.00927867	0.0912226
1371.27	0.0345213	0.00851657	0.0893827
1380	0.0330616	0.0077888	0.0874735
1388.73	0.0316005	0.00709833	0.0855
1397.47	0.0301356	0.00644427	0.0834551
1406.2	0.0286684	0.00582807	0.0813332
1414.94	0.0272084	0.00525286	0.0791419
1423.67	0.0257639	0.00471966	0.0768903
1432.4	0.0243391	0.00422802	0.0745834
1441.14	0.0229432	0.00377864	0.072235
1449.87	0.0215877	0.00337131	0.069868
1458.61	0.0202708	0.00300196	0.0674864
1467.34	0.0189916	0.00266783	0.0650909
1476.08	0.0177535	0.00236697	0.0626903
1484.81	0.0165577	0.00209653	0.0602898
1493.54	0.0154037	0.00185384	0.0578901
1502.28	0.0142973	0.00163741	0.0555046
1511.01	0.0132446	0.00144543	0.053152
1519.75	0.0122467	0.00127555	0.0508432
1528.48	0.0113015	0.00112565	0.0485785
1537.21	0.0104105	0.000994573	0.0463633
1545.95	0.0095777	0.0008812	0.0442114
1554.68	0.00880934	0.000784341	0.0421506
1563.42	0.00810171	0.000701699	0.0401878
1572.15	0.00744871	0.000631351	0.0383171
1580.89	0.00684794	0.000571798	0.0365386
1589.62	0.0062994	0.000521594	0.0348631
1598.35	0.00579948	0.000479186	0.0332943
1607.09	0.00534024	0.000442951	0.0318175
1615.82	0.00491481	0.000411632	0.0304134
1624.56	0.00452025	0.000384391	0.0290723
1633.29	0.00415292	0.000360334	0.0277836
1642.02	0.00380973	0.000338991	0.0265356
1650.76	0.00348936	0.000320066	0.0253236
1659.49	0.00318956	0.000302977	0.0241395
1668.23	0.00290903	0.000287128	0.0229821
1676.96	0.00264484	0.000271892	0.0218407
1685.7	0.00239725	0.000257091	0.0207185
1694.43	0.00216327	0.000241991	0.0196042
1703.16	0.00194355	0.000226425	0.0185029
1711.9	0.00173876	0.000210247	0.0174265
1720.63	0.00154759	0.000193264	0.0163762
1729.37	0.00137	0.000175623	0.0153567
1738.1	0.00120569	0.000157438	0.0143734
1746.83	0.00105284	0.00013878	0.0134166
1755.57	0.000911454	0.000120104	0.012484
1764.3	0.000781735	0.000101816	0.0115764
1773.04	0.00066363	8.42109e-05	0.0106947
1781.77	0.000557179	6.74879e-05	0.00984443
1790.51	0.000461083	5.15558e-05	0.00902144
1799.24	0.000374325	3.64266e-05	0.00821953
1807.97	0.000296817	2.23478e-05	0.00744298
1816.71	0.000240662	1.80673e-05	0.0067151
1825.44	0.000199939	1.65715e-05	0.00604204
1834.18	0.000167606	1.54659e-05	0.00542098
1842.91	0.00014136	1.45702e-05	0.00485253
1851.64	0.000120057	1.38299e-05	0.00433808
1860.38	0.000102905	1.32233e-05	0.00387943
1869.11	8.91538e-05	1.27278e-05	0.00347484
1877.85	7.8138e-05	1.23207e-05	0.00312019
1886.58	6.92479e-05	1.19727e-05	0.00280873
1895.32	6.20746e-05	1.1683e-05	0.00253531
1904.05	5.6263e-05	1.14361e-05	0.00229484
1912.78	5.15249e-05	1.12246e-05	0.00208219
1921.52	4.76411e-05	1.10389e-05	0.00189329
1930.25	4.44159e-05	1.08659e-05	0.0017241
1938.99	4.16721e-05	1.06887e-05	0.00157061
1947.72	3.93272e-05	1.05141e-05	0.00143062
1956.45	0.00136757	0.00116319	0.00289214
1965.19	0.00338968	0.0019253	0.00655527
1973.92	0.00397684	0.00207467	0.00836689
1982.66	0.00434812	0.00222456	0.00948248
1991.39	0.0046494	0.00234446	0.0103225
2000.13	0.00492886	0.00244712	0.0110087
2008.86	0.00507296	0.00247534	0.0114734
2017.59	0.00518871	0.00248988	0.0118568
2026.33	0.00530711	0.00252712	0.0121985
2035.06	0.00539516	0.00252843	0.0124997
2043.8	0.0054645	0.00253277	0.012735
2052.53	0.00540843	0.00246611	0.0127559
2061.26	0.00512403	0.00227852	0.0124104
2070	0.00499806	0.00224121	0.0121603
2078.73	0.00505009	0.00230509	0.0121217
2087.47	0.00498071	0.00223898	0.0119933
2096.2	0.00479558	0.00215302	0.0116602
2104.94	0.00489386	0.00224149	0.0116897
2113.67	0.00492518	0.00224234	0.0117585
2122.4	0.00514455	0.00238279	0.0120977
2131.14	0.00528074	0.0024268	0.0123925
2139.87	0.00535433	0.00244763	0.0126225
2148.61	0.00554578	0.00255875	0.0130105
2157.34	0.00579151	0.00268336	0.0135041
2166.07	0.00605321	0.00281055	0.0140551
2174.81	0.00639809	0.00298554	0.0147424
2183.54	0.00665833	0.00308553	0.0153684
2192.28	0.00704692	0.0033113	0.0161193
2201.01	0.00767602	0.00366892	0.0172095
2209.75	0.00827507	0.00395755	0.0183568
2218.48	0.00902158	0.00436026	0.0197335
2227.21	0.0100269	0.00491842	0.0214998
2235.95	0.0111525	0.00549544	0.0235419
2244.68	0.0122521	0.00601681	0.0256678
2253.42	0.0133645	0.00653869	0.0278699
2262.15	0.0144431	0.00704052	0.0300404
2270.89	0.0155332	0.00755129	0.0322286
2279.62	0.0166075	0.00803252	0.0344259
2288.35	0.017433	0.00830243	0.0363523
2297.09	0.0178966	0.0083366	0.0378024
2305.82	0.0181962	0.00832036	0.0389622
2314.56	0.018442	0.00830546	0.0399805
2323.29	0.0186008	0.00824209	0.040842
2332.02	0.0187209	0.0081709	0.0416069
2340.76	0.0188995	0.00815471	0.0424182
2349.49	0.0193764	0.0083799	0.0435666
2358.23	0.0201405	0.00878849	0.045085
2366.96	0.0211768	0.00934773	0.0470005
2375.7	0.0225552	0.0101238	0.0493924
2384.43	0.0243101	0.0111246	0.0523311
2393.16	0.0265656	0.0124477	0.0559732
2401.9	0.0292511	0.0140478	0.060201
2410.63	0.0322606	0.0158349	0.0648878
2419.37	0.0356538	0.0178616	0.0701026
2428.1	0.0393899	0.020129	0.0757398
2436.83	0.0433487	0.0225462	0.0816342
2445.57	0.047571	0.0251552	0.0878222
2454.3	0.0520594	0.0279904	0.0942587
2463.04	0.0568176	0.0310815	0.100908
2471.77	0.061827	0.0344292	0.107725
2480.51	0.0671518	0.0381213	0.114748
2489.24	0.0728072	0.0422065	0.121956
2497.97	0.078839	0.0467664	0.129366
2506.71	0.0852033	0.0518079	0.136897
2515.44	0.0919514	0.0574371	0.144569
2524.18	0.0992246	0.0638541	0.152493
2532.91	0.10711	0.0712212	0.160726
2541.64	0.115508	0.0795309	0.169135
2550.38	0.117164	0.0812528	0.170709
2559.11	0.116927	0.0810883	0.170364
2567.85	0.116699	0.0809301	0.170031
2576.58	0.116481	0.0807792	0.169714
2585.32	0.116274	0.0806359	0.169413
2594.05	0.116078	0.0804997	0.169127
2602.78	0.115891	0.0803699	0.168854
2611.52	0.115711	0.0802452	0.168593
2620.25	0.115536	0.0801239	0.168338
2628.99	0.115364	0.0800044	0.168087
2637.72	0.115192	0.0798851	0.167836
2646.45	0.115018	0.0797647	0.167583
2655.19	0.114842	0.0796426	0.167326
2663.92	0.114664	0.0795187	0.167066
2672.66	0.114483	0.0793932	0.166802
2681.39	0.1143	0.0792668	0.166537
2690.13	0.114117	0.07914	0.16627
2698.86	0.113935	0.0790135	0.166005
2707.59	0.113753	0.0788875	0.16574
2716.33	0.113573	0.0787621	0.165477
2725.06	0.113392	0.078637	0.165214
2733.8	0.113211	0.0785116	0.16495
2742.53	0.113028	0.0783848	0.164684
2751.26	0.112842	0.0782558	0.164413
2760	0.112652	0.078124	0.164136
2768.73	0.112457	0.0779888	0.163852
2777.47	0.112258	0.0778502	0.163561
2786.2	0.112054	0.0777089	0.163264
2794.94	0.111847	0.0775656	0.162963
2803.67	0.111639	0.0774213	0.16266
2812.4	0.111431	0.0772773	0.162357
2821.14	0.111226	0.0771346	0.162057
2829.87	0.111023	0.0769943	0.161762
2838.61	0.110825	0.0768569	0.161474
2847.34	0.110631	0.0767225	0.161191
2856.07	0.110442	0.0765909	0.160915
2864.81	0.110256	0.076462	0.160644
2873.54	0.110073	0.0763351	0.160377
2882.28	0.109892	0.0762095	0.160114
2891.01	0.109712	0.0760847	0.159851
2899.75	0.109532	0.0759602	0.15959
2908.48	0.109353	0.0758355	0.159328
2917.21	0.109173	0.0757108	0.159066
2925.95	0.108992	0.0755858	0.158803
2934.68	0.108811	0.0754601	0.158539
2943.42	0.108629	0.0753338	0.158274
2952.15	0.108445	0.0752062	0.158006
2960.88	0.108259	0.075077	0.157734
2969.62	0.108069	0.0749455	0.157458
2978.35	0.107875	0.0748112	0.157176
2987.09	0.107677	0.0746735	0.156886
2995.82	0.107473	0.0745319	0.156589
3004.56	0.107263	0.0743865	0.156284
3013.29	0.107048	0.0742374	0.15597
3022.02	0.106829	0.0740852	0.155651
3030.76	0.106606	0.0739306	0.155326
3039.49	0.10638	0.0737745	0.154998
3048.23	0.106155	0.0736178	0.154669
3056.96	0.105929	0.0734616	0.15434
3065.69	0.105706	0.0733064	0.154014
3074.43	0.105484	0.0731529	0.153692
3083.16	0.105265	0.0730011	0.153373
3091.9	0.105049	0.0728512	0.153058
3100.63	0.104835	0.0727028	0.152746
3109.37	0.104623	0.0725556	0.152437
3118.1	0.104412	0.0724091	0.152129
3126.83	0.104201	0.0722631	0.151822
3135.57	0.103991	0.0721177	0.151517
3144.3	0.103783	0.0719728	0.151212
3153.04	0.103575	0.0718287	0.15091
3161.77	0.103369	0.0716857	0.150609
3170.5	0.103165	0.0715444	0.150312
3179.24	0.102965	0.0714056	0.150021
3187.97	0.102768	0.0712694	0.149735
3196.71	0.102576	0.0711363	0.149455
3205.44	0.102389	0.0710065	0.149182
3214.18	0.102206	0.0708798	0.148916
3222.91	0.102028	0.0707559	0.148656
3231.64	0.101853	0.0706344	0.148401
3240.38	0.10168	0.070515	0.14815
3249.11	0.10151	0.0703966	0.147901
3257.85	0.10134	0.0702789	0.147654
3266.58	0.10117	0.0701609	0.147406
3275.32	0.100999	0.0700421	0.147156
3284.05	0.100826	0.0699221	0.146904
3292.78	0.10065	0.0698003	0.146648
3301.52	0.100471	0.069676	0.146387
3310.25	0.100287	0.0695489	0.14612
3318.99	0.1001	0.069419	0.145847
3327.72	0.0999086	0.0692862	0.145568
3336.45	0.099713	0.0691506	0.145283
3345.19	0.0995132	0.069012	0.144992
3353.92	0.0993102	0.0688713	0.144696
3362.66	0.0991047	0.0687288	0.144397
3371.39	0.098898	0.0685854	0.144096
3380.13	0.0986916	0.0684423	0.143795
3388.86	0.0984872	0.0683005	0.143497
3397.59	0.0982859	0.0681609	0.143204
3406.33	0.0980894	0.0680246	0.142917
3415.06	0.0978987	0.0678924	0.14264
3423.8	0.0977144	0.0677646	0.142371
3432.53	0.0975368	0.0676414	0.142112
3441.26	0.0973654	0.0675225	0.141863
3450	0.0971995	0.0674075	0.141621
3458.73	0.0970381	0.0672956	0.141386
3467.47	0.0968797	0.0671857	0.141155
3476.2	0.0967229	0.067077	0.140926
3484.94	0.0965662	0.0669683	0.140698
3493.67	0.0964086	0.066859	0.140468
3502.4	0.0962496	0.0667487	0.140237
3511.14	0.0960887	0.0666371	0.140002
3519.87	0.0959258	0.0665242	0.139765
3528.61	0.0957609	0.0664098	0.139525
3537.34	0.0955941	0.0662942	0.139282
3546.07	0.0954257	0.0661774	0.139036
3554.81	0.0952555	0.0660593	0.138788
3563.54	0.0950828	0.0659396	0.138537
3572.28	0.0949074	0.0658179	0.138281
3581.01	0.0947284	0.0656938	0.13802
3589.75	0.0945454	0.0655669	0.137754
3598.48	0.094358	0.0654369	0.137481
3607.21	0.0941659	0.0653037	0.137201
3615.95	0.0939694	0.0651674	0.136915
3624.68	0.0937694	0.0650287	0.136623
3633.42	0.093567	0.0648884	0.136328
3642.15	0.0933638	0.0647475	0.136032
3650.88	0.0931613	0.064607	0.135737
3659.62	0.0929609	0.064468	0.135445
3668.35	0.0927635	0.0643311	0.135158
3677.09	0.0925695	0.0641966	0.134875
3685.82	0.0923784	0.0640641	0.134596
3694.56	0.0921893	0.0639329	0.134321
3703.29	0.0920007	0.0638021	0.134046
3712.02	0.091811	0.0636706	0.13377
3720.76	0.0916185	0.0635371	0.133489
3729.49	0.0914218	0.0634007	0.133203
3738.23	0.09122	0.0632607	0.132909
3746.96	0.0910133	0.0631174	0.132608
3755.69	0.0908024	0.0629711	0.1323
3764.43	0.0905888	0.062823	0.131989
3773.16	0.0903747	0.0626745	0.131677
3781.9	0.0901626	0.0625275	0.131368
3790.63	0.0899553	0.0623837	0.131066
3799.37	0.089755	0.0622447	0.130774
3808.1	0.0895635	0.0621119	0.130495
3816.83	0.0893819	0.061986	0.130231
3825.57	0.0892111	0.0618676	0.129982
3834.3	0.0890508	0.0617564	0.129748
3843.04	0.0889003	0.061652	0.129529
3851.77	0.0887584	0.0615536	0.129322
3860.5	0.088624	0.0614604	0.129126
3869.24	0.0884955	0.0613713	0.128939
3877.97	0.0883716	0.0612854	0.128758
3886.71	0.0882512	0.0612019	0.128583
3895.44	0.0881332	0.0611201	0.128411
3904.18	0.088017	0.0610394	0.128242
3912.91	0.0879019	0.0609597	0.128074
3921.64	0.0877873	0.0608802	0.127907
3930.38	0.0876727	0.0608007	0.12774
3939.11	0.0875575	0.0607208	0.127572
3947.85	0.0874415	0.0606403	0.127403
3956.58	0.0873242	0.060559	0.127232
3965.31	0.0872056	0.0604767	0.12706
3974.05	0.0870853	0.0603934	0.126884
3982.78	0.0869639	0.0603091	0.126707
3991.52	0.0868418	0.0602244	0.126529
4000.25	0.0867193	0.0601395	0.126351
4008.99	0.0865972	0.0600549	0.126173
4017.72	0.0864764	0.059971	0.125997
4026.45	0.0863574	0.0598886	0.125824
4035.19	0.0862408	0.0598076	0.125654
4043.92	0.0861264	0.0597284	0.125487
4052.66	0.0860146	0.0596508	0.125324
4061.39	0.0859049	0.0595747	0.125164
4070.12	0.0857969	0.0594998	0.125007
4078.86	0.0856896	0.0594254	0.124851
4087.59	0.0855822	0.059351	0.124694
4096.33	0.0854739	0.0592758	0.124537
4105.06	0.0853639	0.0591995	0.124376
4113.8	0.0852516	0.0591216	0.124213
4122.53	0.0851369	0.0590421	0.124045
4131.26	0.0850198	0.0589609	0.123875
4140	0.0849006	0.0588782	0.123701
4148.73	0.0847797	0.0587944	0.123525
4157.47	0.0846578	0.0587099	0.123347
4166.2	0.0845357	0.0586252	0.12317
4174.93	0.0844143	0.058541	0.122993
4183.67	0.0842944	0.0584578	0.122818
4192.4	0.0841765	0.0583761	0.122646
4201.14	0.0840613	0.0582962	0.122478
4209.87	0.0839489	0.0582183	0.122315
4218.61	0.0838394	0.0581423	0.122155
4227.34	0.0837326	0.0580682	0.121999
4236.07	0.0836281	0.0579958	0.121847
4244.81	0.0835254	0.0579245	0.121697
4253.54	0.0834239	0.0578542	0.12155
4262.28	0.0833232	0.0577843	0.121403
4271.01	0.083223	0.0577149	0.121257
4279.74	0.0831231	0.0576456	0.121111
4288.48	0.0830235	0.0575765	0.120966
4297.21	0.0829246	0.0575079	0.120822
4305.95	0.0828269	0.0574402	0.12068
4314.68	0.082731	0.0573737	0.12054
4323.42	0.0826378	0.057309	0.120404
4332.15	0.0825479	0.0572467	0.120273
4340.88	0.082462	0.0571871	0.120148
4349.62	0.0823803	0.0571304	0.120029
4358.35	0.0823027	0.0570766	0.119916
4367.09	0.0822288	0.0570254	0.119808
4375.82	0.0821581	0.0569764	0.119705
4384.56	0.0820898	0.056929	0.119606
4393.29	0.0820228	0.0568825	0.119508
4402.02	0.0819562	0.0568363	0.119411
4410.76	0.081889	0.0567897	0.119313
4419.49	0.0818205	0.0567422	0.119213
4428.23	0.0817502	0.0566935	0.119111
4436.96	0.0816778	0.0566433	0.119006
4445.69	0.0816034	0.0565916	0.118897
4454.43	0.081527	0.0565387	0.118786
4463.16	0.0814489	0.0564845	0.118672
4471.9	0.0813692	0.0564293	0.118556
4480.63	0.0812881	0.056373	0.118438
4489.37	0.0812056	0.0563158	0.118318
4498.1	0.0811218	0.0562576	0.118195
4506.83	0.0810363	0.0561984	0.118071
4515.57	0.0809493	0.056138	0.117944
4524.3	0.0808604	0.0560764	0.117815
4533.04	0.0807697	0.0560135	0.117682
4541.77	0.0806772	0.0559493	0.117548
4550.5	0.0805832	0.0558842	0.117411
4559.24	0.080488	0.0558181	0.117272
4567.97	0.0803919	0.0557515	0.117132
4576.71	0.0802954	0.0556845	0.116991
4585.44	0.0801986	0.0556174	0.11685
4594.18	0.0801018	0.0555503	0.116709
4602.91	0.080005	0.0554832	0.116568
4611.64	0.0799082	0.055416	0.116427
4620.38	0.0798112	0.0553488	0.116286
4629.11	0.0797137	0.0552811	0.116144
4637.85	0.0796158	0.0552133	0.116001
4646.58	0.0795176	0.0551451	0.115858
4655.31	0.0794194	0.0550771	0.115715
4664.05	0.0793216	0.0550093	0.115573
4672.78	0.079225	0.0549422	0.115432
4681.52	0.0791304	0.0548766	0.115294
4690.25	0.0790385	0.0548129	0.11516
4698.99	0.0789503	0.0547517	0.115031
4707.72	0.0788662	0.0546934	0.114909
4716.45	0.0787866	0.0546382	0.114793
4725.19	0.0787112	0.0545859	0.114683
4733.92	0.0786396	0.0545363	0.114579
4742.66	0.0785712	0.0544888	0.114479
4751.39	0.0785049	0.0544428	0.114383
4760.12	0.0784398	0.0543977	0.114288
4768.86	0.0783749	0.0543527	0.114193
4777.59	0.0783095	0.0543073	0.114098
4786.33	0.0782431	0.0542613	0.114001
4795.06	0.0781755	0.0542144	0.113903
4803.8	0.0781069	0.0541668	0.113803
4812.53	0.0780376	0.0541187	0.113702
4821.26	0.077968	0.0540705	0.1136
4830	0.077899	0.0540227	0.1135
4838.73	0.0778312	0.0539756	0.113401
4847.47	0.0777651	0.0539298	0.113305
4856.2	0.077701	0.0538853	0.113211
4864.93	0.0776391	0.0538424	0.113121
4873.67	0.0775795	0.0538011	0.113034
4882.4	0.0775223	0.0537615	0.112951
4891.14	0.0774674	0.0537234	0.112871
4899.87	0.0774146	0.0536867	0.112794
4908.61	0.0773639	0.0536516	0.11272
4917.34	0.0773153	0.0536179	0.112649
4926.07	0.0772687	0.0535855	0.112581
4934.81	0.0772241	0.0535546	0.112516
4943.54	0.0771815	0.0535251	0.112454
4952.28	0.0771406	0.0534967	0.112395
4961.01	0.0771014	0.0534696	0.112338
4969.74	0.0770633	0.0534431	0.112282
4978.48	0.0770258	0.0534171	0.112228
4987.21	0.0769882	0.053391	0.112173
4995.95	0.07695	0.0533646	0.112117
5004.68	0.0769106	0.0533372	0.11206
5013.42	0.0768696	0.0533088	0.112
5022.15	0.0768268	0.0532791	0.111938
5030.88	0.0767822	0.0532482	0.111873
5039.62	0.0767363	0.0532163	0.111806
5048.35	0.0766894	0.0531838	0.111737
5057.09	0.0766424	0.0531512	0.111669
5065.82	0.076596	0.053119	0.111601
5074.55	0.0765508	0.0530877	0.111535
5083.29	0.0765076	0.0530577	0.111472
5092.02	0.0764667	0.0530294	0.111413
5100.76	0.0764285	0.0530029	0.111357
5109.49	0.0763928	0.0529781	0.111305
5118.23	0.0763594	0.0529549	0.111256
5126.96	0.0763277	0.052933	0.11121
5135.69	0.0762973	0.0529119	0.111166
5144.43	0.0762675	0.0528912	0.111123
5153.16	0.0762377	0.0528706	0.111079
5161.9	0.0762078	0.0528498	0.111036
5170.63	0.0761772	0.0528286	0.110991
5179.36	0.076146	0.052807	0.110946
5188.1	0.0761142	0.0527849	0.110899
5196.83	0.0760818	0.0527624	0.110852
5205.57	0.0760491	0.0527398	0.110804
5214.3	0.0760164	0.0527171	0.110757
5223.04	0.075984	0.0526946	0.11071
5231.77	0.075952	0.0526724	0.110663
5240.5	0.0759204	0.0526505	0.110617
5249.24	0.0758894	0.052629	0.110572
5257.97	0.0758587	0.0526077	0.110527
5266.71	0.0758286	0.0525868	0.110483
5275.44	0.0757988	0.0525662	0.11044
5284.17	0.0757693	0.0525457	0.110397
5292.91	0.0757402	0.0525255	0.110354
5301.64	0.0757115	0.0525056	0.110313
5310.38	0.0756833	0.0524861	0.110271
5319.11	0.0756558	0.052467	0.110231
5327.85	0.0756292	0.0524485	0.110193
5336.58	0.0756035	0.0524307	0.110155
5345.31	0.0755786	0.0524135	0.110119
5354.05	0.0755548	0.0523969	0.110084
5362.78	0.0755316	0.0523809	0.11005
5371.52	0.075509	0.0523652	0.110017
5380.25	0.0754868	0.0523498	0.109985
5388.98	0.0754647	0.0523345	0.109953
5397.72	0.0754425	0.0523191	0.109921
5406.45	0.07542	0.0523035	0.109888
5415.19	0.0753971	0.0522876	0.109855
5423.92	0.0753738	0.0522715	0.109821
5432.66	0.0753501	0.052255	0.109786
5441.39	0.0753261	0.0522383	0.109751
5450.12	0.0753018	0.0522215	0.109716
5458.86	0.0752773	0.0522045	0.10968
5467.59	0.0752528	0.0521875	0.109644
5476.33	0.0752281	0.0521704	0.109608
5485.06	0.0752032	0.0521532	0.109572
5493.8	0.075178	0.0521357	0.109535
5502.53	0.0751523	0.0521179	0.109498
5511.26	0.0751261	0.0520997	0.10946
5520	0.0750992	0.052081	0.10942
5528.73	0.0750717	0.0520619	0.10938
5537.47	0.0750436	0.0520424	0.109339
5546.2	0.0750149	0.0520225	0.109298
5554.93	0.0749859	0.0520025	0.109255
5563.67	0.0749569	0.0519823	0.109213
5572.4	0.074928	0.0519623	0.109171
5581.14	0.0748995	0.0519425	0.10913
5589.87	0.0748714	0.051923	0.109089
5598.61	0.0748437	0.0519038	0.109048
5607.34	0.0748164	0.0518849	0.109008
5616.07	0.0747892	0.0518661	0.108969
5624.81	0.074762	0.0518472	0.108929
5633.54	0.0747345	0.0518281	0.108889
5642.28	0.0747064	0.0518086	0.108848
5651.01	0.0746776	0.0517886	0.108806
5659.74	0.0746479	0.051768	0.108763
5668.48	0.0746174	0.0517469	0.108718
5677.21	0.0745861	0.0517251	0.108673
5685.95	0.0745541	0.051703	0.108626
5694.68	0.0745217	0.0516805	0.108579
5703.42	0.0744889	0.0516578	0.108531
5712.15	0.0744559	0.0516349	0.108483
5720.88	0.0744228	0.0516119	0.108435
5729.62	0.0743895	0.0515888	0.108386
5738.35	0.074356	0.0515656	0.108338
5747.09	0.0743221	0.0515421	0.108288
5755.82	0.0742877	0.0515182	0.108238
5764.55	0.0742527	0.0514939	0.108187
5773.29	0.0742169	0.0514692	0.108135
5782.02	0.0741806	0.0514439	0.108082
5790.76	0.0741436	0.0514183	0.108028
5799.49	0.0741061	0.0513923	0.107974
5808.23	0.0740684	0.0513661	0.107919
5816.96	0.0740306	0.0513399	0.107863
5825.69	0.0739929	0.0513138	0.107808
5834.43	0.0739554	0.0512878	0.107754
5843.16	0.0739182	0.051262	0.1077
5851.9	0.0738812	0.0512364	0.107646
5860.63	0.0738446	0.0512109	0.107592
5869.36	0.0738081	0.0511856	0.107539
5878.1	0.0737718	0.0511604	0.107486
5886.83	0.0737356	0.0511353	0.107434
5895.57	0.0736997	0.0511104	0.107381
5904.3	0.0736642	0.0510858	0.10733
5913.04	0.0736293	0.0510616	0.107279
5921.77	0.0735953	0.0510381	0.107229
5930.5	0.0735626	0.0510154	0.107182
5939.24	0.0735315	0.0509938	0.107136
5947.97	0.0735021	0.0509734	0.107093
5956.71	0.0734745	0.0509543	0.107053
5965.44	0.0734488	0.0509365	0.107016
5974.17	0.0734248	0.0509198	0.106981
5982.91	0.0734023	0.0509042	0.106948
5991.64	0.0733809	0.0508894	0.106917
6000.38	0.0733603	0.0508751	0.106887
6009.11	0.0733402	0.0508611	0.106858
6017.85	0.0733203	0.0508474	0.106829
6026.58	0.0733006	0.0508337	0.1068
6035.31	0.0732808	0.0508199	0.106771
6044.05	0.073261	0.0508062	0.106742
6052.78	0.0732413	0.0507926	0.106714
6061.52	0.0732219	0.0507791	0.106685
6070.25	0.0732028	0.0507659	0.106657
6078.98	0.0731842	0.050753	0.10663
6087.72	0.073166	0.0507404	0.106604
6096.45	0.0731483	0.0507281	0.106578
6105.19	0.0731309	0.050716	0.106553
6113.92	0.0731138	0.0507041	0.106528
6122.66	0.0730969	0.0506924	0.106503
6131.39	0.07308	0.0506807	0.106478
6140.12	0.073063	0.0506689	0.106454
6148.86	0.0730461	0.0506572	0.106429
6157.59	0.0730291	0.0506454	0.106404
6166.33	0.0730124	0.0506338	0.10638
6175.06	0.0729958	0.0506223	0.106356
6183.79	0.0729797	0.0506112	0.106332
6192.53	0.0729641	0.0506003	0.106309
6201.26	0.0729489	0.0505898	0.106287
6210	0.0729343	0.0505796	0.106266
6218.73	0.0729201	0.0505698	0.106245
6227.47	0.0729062	0.0505602	0.106225
6236.2	0.0728926	0.0505507	0.106205
6244.93	0.0728789	0.0505413	0.106185
6253.67	0.0728652	0.0505318	0.106166
6262.4	0.0728514	0.0505222	0.106145
6271.14	0.0728375	0.0505125	0.106125
6279.87	0.0728235	0.0505028	0.106105
6288.6	0.0728094	0.050493	0.106084
6297.34	0.0727955	0.0504834	0.106064
6306.07	0.0727818	0.0504739	0.106044
6314.81	0.0727685	0.0504647	0.106025
6323.54	0.0727556	0.0504558	0.106006
6332.28	0.0727432	0.0504472	0.105988
6341.01	0.0727313	0.0504389	0.10597
6349.74	0.0727198	0.0504309	0.105954
6358.48	0.0727087	0.0504232	0.105937
6367.21	0.0726979	0.0504157	0.105922
6375.95	0.0726872	0.0504083	0.105906
6384.68	0.0726767	0.050401	0.105891
6393.41	0.0726662	0.0503937	0.105876
6402.15	0.0726558	0.0503865	0.10586
6410.88	0.0726453	0.0503793	0.105845
6419.62	0.072635	0.0503721	0.10583
6428.35	0.0726248	0.050365	0.105815
6437.09	0.0726146	0.050358	0.1058
6445.82	0.0726047	0.0503511	0.105786
6454.55	0.0725949	0.0503443	0.105772
6463.29	0.0725852	0.0503376	0.105758
6472.02	0.0725757	0.050331	0.105744
6480.76	0.0725663	0.0503244	0.10573
6489.49	0.0725569	0.0503179	0.105716
6498.22	0.0725476	0.0503115	0.105703
6506.96	0.0725383	0.050305	0.105689
6515.69	0.072529	0.0502986	0.105676
6524.43	0.0725195	0.050292	0.105662
6533.16	0.07251	0.0502854	0.105648
6541.9	0.0725004	0.0502787	0.105634
6550.63	0.0724907	0.050272	0.10562
6559.36	0.0724808	0.0502652	0.105605
6568.1	0.0724708	0.0502582	0.105591
6576.83	0.0724607	0.0502512	0.105576
6585.57	0.0724504	0.0502441	0.105561
6594.3	0.07244	0.0502369	0.105546
6603.04	0.0724296	0.0502296	0.105531
6611.77	0.072419	0.0502223	0.105515
6620.5	0.0724082	0.0502148	0.1055
6629.24	0.0723974	0.0502073	0.105484
6637.97	0.0723865	0.0501997	0.105468
6646.71	0.0723753	0.050192	0.105452
6655.44	0.0723639	0.0501841	0.105435
6664.17	0.0723522	0.050176	0.105418
6672.91	0.0723402	0.0501676	0.1054
6681.64	0.0723277	0.050159	0.105382
6690.38	0.0723148	0.05015	0.105364
6699.11	0.0723014	0.0501407	0.105344
6707.85	0.0722875	0.0501311	0.105324
6716.58	0.0722731	0.0501211	0.105303
6725.31	0.0722583	0.0501109	0.105281
6734.05	0.0722431	0.0501003	0.105259
6742.78	0.0722276	0.0500896	0.105236
6751.52	0.0722119	0.0500786	0.105214
6760.25	0.072196	0.0500676	0.10519
6768.98	0.0721801	0.0500566	0.105167
6777.72	0.0721642	0.0500456	0.105144
6786.45	0.0721483	0.0500346	0.105121
6795.19	0.0721326	0.0500237	0.105098
6803.92	0.0721171	0.0500129	0.105075
6812.66	0.0721018	0.0500023	0.105053
6821.39	0.0720868	0.0499919	0.105031
6830.12	0.0720721	0.0499817	0.10501
6838.86	0.0720577	0.0499717	0.104989
6847.59	0.0720437	0.049962	0.104969
6856.33	0.0720302	0.0499526	0.104949
6865.06	0.0720171	0.0499436	0.10493
6873.79	0.0720044	0.0499348	0.104911
6882.53	0.0719922	0.0499263	0.104894
6891.26	0.0719804	0.0499181	0.104876
6900	0.0719689	0.0499102	0.10486
6908.73	0.0719576	0.0499023	0.104843
6917.47	0.0719464	0.0498945	0.104827
6926.2	0.0719352	0.0498868	0.10481
6934.93	0.071924	0.049879	0.104794
6943.67	0.0719129	0.0498713	0.104778
6952.4	0.0719017	0.0498636	0.104762
6961.14	0.0718906	0.0498558	0.104745
6969.87	0.0718793	0.049848	0.104729
6978.6	0.071868	0.0498402	0.104712

## Sheet: e
Time (s)	NH3 (base case)	NH3 (retention=0)	NH3 (retention=1)
0	1	1	1
8.73417	0.999958	0.999958	0.999958
17.4683	0.999954	0.999954	0.999954
26.2025	0.999951	0.999951	0.999951
34.9367	0.999951	0.999951	0.999951
43.6709	0.999953	0.999953	0.999953
52.405	0.999956	0.999956	0.999956
61.1392	0.999959	0.999959	0.999959
69.8734	0.999964	0.999964	0.999964
78.6076	0.99997	0.99997	0.99997
87.3417	0.999977	0.999977	0.999977
96.0759	0.999983	0.999983	0.999983
104.81	0.999989	0.999989	0.999989
113.544	0.999992	0.999992	0.999992
122.278	0.999994	0.999994	0.999994
131.013	0.999995	0.999995	0.999995
139.747	0.999995	0.999995	0.999995
148.481	0.999996	0.999996	0.999996
157.215	0.999997	0.999997	0.999997
165.949	1	1	1
174.683	1	1	1
183.418	1.00001	1.00001	1.00001
192.152	1.00001	1.00001	1.00001
200.886	1.00002	1.00002	1.00002
209.62	1.00002	1.00002	1.00002
218.354	1.00002	1.00002	1.00002
227.089	1.00003	1.00003	1.00003
235.823	1.00003	1.00003	1.00003
244.557	1.00003	1.00003	1.00003
253.291	1.00002	1.00002	1.00002
262.025	1.00002	1.00002	1.00002
270.759	1.00002	1.00002	1.00002
279.494	1.00003	1.00003	1.00003
288.228	1.00003	1.00003	1.00003
296.962	1.00003	1.00003	1.00003
305.696	1.00004	1.00004	1.00004
314.43	1.00004	1.00004	1.00004
323.164	1.00005	1.00005	1.00005
331.899	1.00005	1.00005	1.00005
340.633	1.00005	1.00005	1.00005
349.367	1.00005	1.00005	1.00005
358.101	1.00004	1.00004	1.00004
366.835	1.00004	1.00004	1.00004
375.569	1.00003	1.00003	1.00003
384.304	1.00003	1.00003	1.00003
393.038	1.00003	1.00003	1.00003
401.772	1.00003	1.00003	1.00003
410.506	1.00003	1.00003	1.00003
419.24	1.00003	1.00003	1.00003
427.974	1.00004	1.00004	1.00004
436.709	1.00005	1.00005	1.00005
445.443	1.00006	1.00006	1.00006
454.177	1.00006	1.00006	1.00006
462.911	0.999977	0.999977	0.999977
471.645	0.999185	0.999185	0.999185
480.38	0.997176	0.997176	0.997176
489.114	0.993421	0.993421	0.993421
497.848	0.987377	0.987377	0.987377
506.582	0.978548	0.978548	0.978548
515.316	0.966513	0.966513	0.966513
524.05	0.950951	0.950951	0.950951
532.785	0.931673	0.931673	0.931673
541.519	0.908632	0.908632	0.908632
550.253	0.881942	0.881942	0.881942
558.987	0.851868	0.851868	0.851868
567.721	0.818802	0.818802	0.818802
576.455	0.783228	0.783228	0.783228
585.19	0.745684	0.745684	0.745684
593.924	0.706722	0.706722	0.706722
602.658	0.666894	0.666894	0.666894
611.392	0.626735	0.626735	0.626735
620.126	0.586739	0.586739	0.586739
628.86	0.54735	0.54735	0.54735
637.595	0.508968	0.508968	0.508968
646.329	0.471951	0.471951	0.471951
655.063	0.436597	0.436597	0.436597
663.797	0.403136	0.403136	0.403136
672.531	0.371743	0.371743	0.371743
681.266	0.342536	0.342536	0.342536
690	0.315569	0.315569	0.315569
698.734	0.290846	0.290846	0.290846
707.468	0.268327	0.268327	0.268327
716.202	0.247932	0.247932	0.247932
724.936	0.229551	0.229551	0.229551
733.671	0.213052	0.213052	0.213052
742.405	0.198291	0.198291	0.198291
751.139	0.185115	0.185115	0.185115
759.873	0.17337	0.17337	0.17337
768.607	0.162904	0.162904	0.162904
777.341	0.153572	0.153572	0.153572
786.076	0.145237	0.145237	0.145237
794.81	0.137773	0.137773	0.137773
803.544	0.131065	0.131065	0.131065
812.278	0.125005	0.125005	0.125005
821.012	0.119502	0.119502	0.119502
829.746	0.114481	0.114481	0.114481
838.481	0.109874	0.109874	0.109874
847.215	0.105628	0.105628	0.105628
855.949	0.101698	0.101698	0.101698
864.683	0.0980498	0.0980498	0.0980498
873.417	0.0946543	0.0946543	0.0946543
882.152	0.0914876	0.0914876	0.0914876
890.886	0.0885294	0.0885294	0.0885294
899.62	0.0857629	0.0857629	0.0857629
908.354	0.0831758	0.0831758	0.0831758
917.088	0.080757	0.080757	0.080757
925.822	0.0784955	0.0784955	0.0784955
934.557	0.0763806	0.0763806	0.0763806
943.291	0.0744036	0.0744036	0.0744036
952.025	0.072559	0.072559	0.072559
960.759	0.0708444	0.0708444	0.0708444
969.493	0.0692575	0.0692575	0.0692575
978.227	0.0677966	0.0677966	0.0677966
986.962	0.0664594	0.0664594	0.0664594
995.696	0.065242	0.065242	0.065242
1004.43	0.0641402	0.0641402	0.0641402
1013.16	0.0631503	0.0631503	0.0631503
1021.9	0.0622684	0.0622684	0.0622684
1030.63	0.0614879	0.0614879	0.0614879
1039.37	0.0608019	0.0608019	0.0608019
1048.1	0.0602039	0.0602039	0.0602039
1056.83	0.0596847	0.0596847	0.0596847
1065.57	0.0592379	0.0592379	0.0592379
1074.3	0.0588561	0.0588561	0.0588561
1083.04	0.0585317	0.0585317	0.0585317
1091.77	0.0582571	0.0582571	0.0582571
1100.51	0.0580231	0.0580231	0.0580231
1109.24	0.0578208	0.0578208	0.0578208
1117.97	0.057643	0.057643	0.057643
1126.71	0.0574815	0.0574815	0.0574815
1135.44	0.0573254	0.0573254	0.0573254
1144.18	0.0571583	0.0571583	0.0571583
1152.91	0.0569688	0.0569688	0.0569688
1161.65	0.056751	0.056751	0.056751
1170.38	0.0564998	0.0564998	0.0564998
1179.11	0.0562074	0.0562074	0.0562074
1187.85	0.0558681	0.0558681	0.0558681
1196.58	0.0554801	0.0554801	0.0554801
1205.32	0.0550385	0.0550385	0.0550385
1214.05	0.0545366	0.0545366	0.0545366
1222.78	0.0539714	0.0539714	0.0539714
1231.52	0.0533403	0.0533403	0.0533403
1240.25	0.0526398	0.0526398	0.0526398
1248.99	0.0518687	0.0518687	0.0518687
1257.72	0.0510265	0.0510265	0.0510265
1266.46	0.050104	0.050104	0.050104
1275.19	0.0490978	0.0490978	0.0490978
1283.92	0.0480113	0.0480113	0.0480113
1292.66	0.0468511	0.0468511	0.0468511
1301.39	0.0456252	0.0456252	0.0456252
1310.13	0.0443432	0.0443432	0.0443432
1318.86	0.0430146	0.0430146	0.0430146
1327.59	0.041652	0.041652	0.041652
1336.33	0.0402627	0.0402627	0.0402627
1345.06	0.03885	0.03885	0.03885
1353.8	0.037417	0.037417	0.037417
1362.53	0.0359737	0.0359737	0.0359737
1371.27	0.0345213	0.0345213	0.0345213
1380	0.0330616	0.0330616	0.0330616
1388.73	0.0316005	0.0316005	0.0316005
1397.47	0.0301356	0.0301356	0.0301356
1406.2	0.0286684	0.0286684	0.0286684
1414.94	0.0272084	0.0272084	0.0272084
1423.67	0.0257639	0.0257639	0.0257639
1432.4	0.0243391	0.0243391	0.0243391
1441.14	0.0229432	0.0229432	0.0229432
1449.87	0.0215877	0.0215877	0.0215877
1458.61	0.0202708	0.0202708	0.0202708
1467.34	0.0189916	0.0189916	0.0189916
1476.08	0.0177535	0.0177535	0.0177535
1484.81	0.0165577	0.0165577	0.0165577
1493.54	0.0154037	0.0154037	0.0154037
1502.28	0.0142973	0.0142973	0.0142973
1511.01	0.0132446	0.0132446	0.0132446
1519.75	0.0122467	0.0122467	0.0122467
1528.48	0.0113015	0.0113015	0.0113015
1537.21	0.0104105	0.0104105	0.0104105
1545.95	0.0095777	0.0095777	0.0095777
1554.68	0.00880934	0.00880934	0.00880934
1563.42	0.00810171	0.00810171	0.00810171
1572.15	0.00744871	0.00744871	0.00744871
1580.89	0.00684794	0.00684794	0.00684794
1589.62	0.0062994	0.0062994	0.0062994
1598.35	0.00579948	0.00579948	0.00579948
1607.09	0.00534024	0.00534024	0.00534024
1615.82	0.00491481	0.00491481	0.00491481
1624.56	0.00452025	0.00452025	0.00452025
1633.29	0.00415292	0.00415292	0.00415292
1642.02	0.00380973	0.00380973	0.00380973
1650.76	0.00348936	0.00348936	0.00348936
1659.49	0.00318956	0.00318956	0.00318956
1668.23	0.00290903	0.00290903	0.00290903
1676.96	0.00264484	0.00264484	0.00264484
1685.7	0.00239725	0.00239725	0.00239725
1694.43	0.00216327	0.00216327	0.00216327
1703.16	0.00194355	0.00194355	0.00194355
1711.9	0.00173876	0.00173876	0.00173876
1720.63	0.00154759	0.00154759	0.00154759
1729.37	0.00137	0.00137	0.00137
1738.1	0.00120569	0.00120569	0.00120569
1746.83	0.00105284	0.00105284	0.00105284
1755.57	0.000911454	0.000911454	0.000911454
1764.3	0.000781735	0.000781735	0.000781735
1773.04	0.00066363	0.00066363	0.00066363
1781.77	0.000557179	0.000557179	0.000557179
1790.51	0.000461083	0.000461083	0.000461083
1799.24	0.000374325	0.000374325	0.000374325
1807.97	0.000296817	0.000296817	0.000296817
1816.71	0.000240662	0.000240662	0.000240662
1825.44	0.000199939	0.000199939	0.000199939
1834.18	0.000167606	0.000167606	0.000167606
1842.91	0.00014136	0.00014136	0.00014136
1851.64	0.000120057	0.000120057	0.000120057
1860.38	0.000102905	0.000102905	0.000102905
1869.11	8.91538e-05	8.91538e-05	8.91538e-05
1877.85	7.8138e-05	7.8138e-05	7.8138e-05
1886.58	6.92479e-05	6.92479e-05	6.92479e-05
1895.32	6.20746e-05	6.20746e-05	6.20746e-05
1904.05	5.6263e-05	5.6263e-05	5.6263e-05
1912.78	5.15249e-05	5.15249e-05	5.15249e-05
1921.52	4.76411e-05	4.76411e-05	4.76411e-05
1930.25	4.44159e-05	4.44159e-05	4.44159e-05
1938.99	4.16721e-05	4.16721e-05	4.16721e-05
1947.72	3.93272e-05	3.93272e-05	3.93272e-05
1956.45	0.00136757	0.00143759	3.73354e-05
1965.19	0.00338968	0.00356757	3.5606e-05
1973.92	0.00397684	0.00418909	3.41116e-05
1982.66	0.00434812	0.00458479	3.28282e-05
1991.39	0.0046494	0.00490822	3.17667e-05
2000.13	0.00492886	0.00520874	3.08829e-05
2008.86	0.00507296	0.0053674	3.01493e-05
2017.59	0.00518871	0.00549645	2.95606e-05
2026.33	0.00530711	0.0056283	2.90909e-05
2035.06	0.00539516	0.00572754	2.87151e-05
2043.8	0.0054645	0.00580525	2.84051e-05
2052.53	0.00540843	0.00574836	2.81131e-05
2061.26	0.00512403	0.00544861	2.78244e-05
2070	0.00499806	0.00531627	2.75357e-05
2078.73	0.00505009	0.00537126	2.72327e-05
2087.47	0.00498071	0.00529719	2.69009e-05
2096.2	0.00479558	0.00509949	2.65444e-05
2104.94	0.00489386	0.00520404	2.61583e-05
2113.67	0.00492518	0.00524014	2.57855e-05
2122.4	0.00514455	0.00547583	2.54452e-05
2131.14	0.00528074	0.00562228	2.51185e-05
2139.87	0.00535433	0.00570319	2.48011e-05
2148.61	0.00554578	0.00591034	2.45069e-05
2157.34	0.00579151	0.00617533	2.42346e-05
2166.07	0.00605321	0.00645782	2.39829e-05
2174.81	0.00639809	0.00682934	2.37477e-05
2183.54	0.00665833	0.00711147	2.35316e-05
2192.28	0.00704692	0.00752958	2.33242e-05
2201.01	0.00767602	0.00820441	2.31088e-05
2209.75	0.00827507	0.00884889	2.28864e-05
2218.48	0.00902158	0.00965249	2.26632e-05
2227.21	0.0100269	0.0107339	2.24371e-05
2235.95	0.0111525	0.0119471	2.22058e-05
2244.68	0.0122521	0.0131369	2.1982e-05
2253.42	0.0133645	0.0143438	2.17734e-05
2262.15	0.0144431	0.0155162	2.15743e-05
2270.89	0.0155332	0.0167035	2.13773e-05
2279.62	0.0166075	0.0178786	2.1183e-05
2288.35	0.017433	0.0187907	2.10027e-05
2297.09	0.0178966	0.0193157	2.08443e-05
2305.82	0.0181962	0.0196651	2.07109e-05
2314.56	0.018442	0.0199579	2.06021e-05
2323.29	0.0186008	0.0201578	2.05206e-05
2332.02	0.0187209	0.0203164	2.04672e-05
2340.76	0.0188995	0.0205402	2.04437e-05
2349.49	0.0193764	0.0210875	2.04495e-05
2358.23	0.0201405	0.0219464	2.04755e-05
2366.96	0.0211768	0.0231037	2.05175e-05
2375.7	0.0225552	0.0246343	2.05717e-05
2384.43	0.0243101	0.0265787	2.06329e-05
2393.16	0.0265656	0.0290736	2.07e-05
2401.9	0.0292511	0.0320399	2.07648e-05
2410.63	0.0322606	0.0353656	2.08149e-05
2419.37	0.0356538	0.039121	2.08474e-05
2428.1	0.0393899	0.0432602	2.0859e-05
2436.83	0.0433487	0.0476547	2.08429e-05
2445.57	0.047571	0.052355	2.07998e-05
2454.3	0.0520594	0.0573642	2.07329e-05
2463.04	0.0568176	0.0626882	2.06426e-05
2471.77	0.061827	0.0683097	2.05306e-05
2480.51	0.0671518	0.0743023	2.04013e-05
2489.24	0.0728072	0.0806845	2.02583e-05
2497.97	0.078839	0.0875096	2.01054e-05
2506.71	0.0852033	0.0947298	1.99474e-05
2515.44	0.0919514	0.102403	1.97896e-05
2524.18	0.0992246	0.110689	1.96365e-05
2532.91	0.10711	0.119692	1.94939e-05
2541.64	0.115508	0.129301	1.93742e-05
2550.38	0.117164	0.131239	1.93192e-05
2559.11	0.116927	0.130974	1.92801e-05
2567.85	0.116699	0.130718	1.92425e-05
2576.58	0.116481	0.130474	1.92066e-05
2585.32	0.116274	0.130243	1.91725e-05
2594.05	0.116078	0.130023	1.91401e-05
2602.78	0.115891	0.129813	1.91093e-05
2611.52	0.115711	0.129612	1.90796e-05
2620.25	0.115536	0.129416	1.90508e-05
2628.99	0.115364	0.129223	1.90224e-05
2637.72	0.115192	0.12903	1.8994e-05
2646.45	0.115018	0.128836	1.89654e-05
2655.19	0.114842	0.128639	1.89363e-05
2663.92	0.114664	0.128438	1.89069e-05
2672.66	0.114483	0.128236	1.8877e-05
2681.39	0.1143	0.128031	1.8847e-05
2690.13	0.114117	0.127827	1.88168e-05
2698.86	0.113935	0.127622	1.87867e-05
2707.59	0.113753	0.127419	1.87568e-05
2716.33	0.113573	0.127216	1.8727e-05
2725.06	0.113392	0.127014	1.86972e-05
2733.8	0.113211	0.126812	1.86674e-05
2742.53	0.113028	0.126607	1.86373e-05
2751.26	0.112842	0.126399	1.86066e-05
2760	0.112652	0.126186	1.85753e-05
2768.73	0.112457	0.125967	1.85431e-05
2777.47	0.112258	0.125743	1.85102e-05
2786.2	0.112054	0.125515	1.84766e-05
2794.94	0.111847	0.125284	1.84425e-05
2803.67	0.111639	0.125051	1.84082e-05
2812.4	0.111431	0.124818	1.83739e-05
2821.14	0.111226	0.124588	1.834e-05
2829.87	0.111023	0.124361	1.83067e-05
2838.61	0.110825	0.124139	1.8274e-05
2847.34	0.110631	0.123922	1.8242e-05
2856.07	0.110442	0.123709	1.82107e-05
2864.81	0.110256	0.123501	1.81801e-05
2873.54	0.110073	0.123296	1.81499e-05
2882.28	0.109892	0.123093	1.81201e-05
2891.01	0.109712	0.122892	1.80904e-05
2899.75	0.109532	0.122691	1.80608e-05
2908.48	0.109353	0.122489	1.80311e-05
2917.21	0.109173	0.122288	1.80015e-05
2925.95	0.108992	0.122086	1.79717e-05
2934.68	0.108811	0.121883	1.79419e-05
2943.42	0.108629	0.121679	1.79118e-05
2952.15	0.108445	0.121473	1.78815e-05
2960.88	0.108259	0.121264	1.78508e-05
2969.62	0.108069	0.121052	1.78195e-05
2978.35	0.107875	0.120835	1.77876e-05
2987.09	0.107677	0.120612	1.77548e-05
2995.82	0.107473	0.120384	1.77212e-05
3004.56	0.107263	0.120149	1.76866e-05
3013.29	0.107048	0.119908	1.76512e-05
3022.02	0.106829	0.119662	1.7615e-05
3030.76	0.106606	0.119413	1.75782e-05
3039.49	0.10638	0.11916	1.75411e-05
3048.23	0.106155	0.118907	1.75038e-05
3056.96	0.105929	0.118655	1.74667e-05
3065.69	0.105706	0.118404	1.74298e-05
3074.43	0.105484	0.118156	1.73933e-05
3083.16	0.105265	0.117911	1.73572e-05
3091.9	0.105049	0.117669	1.73216e-05
3100.63	0.104835	0.117429	1.72863e-05
3109.37	0.104623	0.117192	1.72513e-05
3118.1	0.104412	0.116955	1.72164e-05
3126.83	0.104201	0.116719	1.71817e-05
3135.57	0.103991	0.116484	1.71472e-05
3144.3	0.103783	0.11625	1.71127e-05
3153.04	0.103575	0.116017	1.70784e-05
3161.77	0.103369	0.115786	1.70444e-05
3170.5	0.103165	0.115558	1.70108e-05
3179.24	0.102965	0.115334	1.69778e-05
3187.97	0.102768	0.115114	1.69455e-05
3196.71	0.102576	0.114899	1.69138e-05
3205.44	0.102389	0.114689	1.68829e-05
3214.18	0.102206	0.114485	1.68528e-05
3222.91	0.102028	0.114285	1.68234e-05
3231.64	0.101853	0.114089	1.67945e-05
3240.38	0.10168	0.113896	1.67661e-05
3249.11	0.10151	0.113704	1.67379e-05
3257.85	0.10134	0.113514	1.67099e-05
3266.58	0.10117	0.113324	1.66819e-05
3275.32	0.100999	0.113132	1.66537e-05
3284.05	0.100826	0.112938	1.66251e-05
3292.78	0.10065	0.112741	1.65961e-05
3301.52	0.100471	0.11254	1.65666e-05
3310.25	0.100287	0.112335	1.65364e-05
3318.99	0.1001	0.112125	1.65055e-05
3327.72	0.0999086	0.111911	1.64739e-05
3336.45	0.099713	0.111692	1.64417e-05
3345.19	0.0995132	0.111468	1.64087e-05
3353.92	0.0993102	0.111241	1.63753e-05
3362.66	0.0991047	0.11101	1.63414e-05
3371.39	0.098898	0.110779	1.63073e-05
3380.13	0.0986916	0.110548	1.62733e-05
3388.86	0.0984872	0.110319	1.62396e-05
3397.59	0.0982859	0.110093	1.62064e-05
3406.33	0.0980894	0.109873	1.6174e-05
3415.06	0.0978987	0.10966	1.61425e-05
3423.8	0.0977144	0.109453	1.61121e-05
3432.53	0.0975368	0.109254	1.60828e-05
3441.26	0.0973654	0.109062	1.60546e-05
3450	0.0971995	0.108876	1.60272e-05
3458.73	0.0970381	0.108696	1.60006e-05
3467.47	0.0968797	0.108518	1.59745e-05
3476.2	0.0967229	0.108343	1.59486e-05
3484.94	0.0965662	0.108167	1.59228e-05
3493.67	0.0964086	0.10799	1.58968e-05
3502.4	0.0962496	0.107812	1.58706e-05
3511.14	0.0960887	0.107632	1.58441e-05
3519.87	0.0959258	0.10745	1.58172e-05
3528.61	0.0957609	0.107265	1.579e-05
3537.34	0.0955941	0.107078	1.57625e-05
3546.07	0.0954257	0.10689	1.57347e-05
3554.81	0.0952555	0.106699	1.57067e-05
3563.54	0.0950828	0.106505	1.56782e-05
3572.28	0.0949074	0.106309	1.56493e-05
3581.01	0.0947284	0.106108	1.56198e-05
3589.75	0.0945454	0.105903	1.55896e-05
3598.48	0.094358	0.105694	1.55587e-05
3607.21	0.0941659	0.105478	1.5527e-05
3615.95	0.0939694	0.105258	1.54946e-05
3624.68	0.0937694	0.105034	1.54616e-05
3633.42	0.093567	0.104808	1.54283e-05
3642.15	0.0933638	0.10458	1.53948e-05
3650.88	0.0931613	0.104353	1.53614e-05
3659.62	0.0929609	0.104129	1.53283e-05
3668.35	0.0927635	0.103907	1.52958e-05
3677.09	0.0925695	0.10369	1.52638e-05
3685.82	0.0923784	0.103476	1.52323e-05
3694.56	0.0921893	0.103264	1.52011e-05
3703.29	0.0920007	0.103053	1.517e-05
3712.02	0.091811	0.102841	1.51387e-05
3720.76	0.0916185	0.102625	1.5107e-05
3729.49	0.0914218	0.102405	1.50745e-05
3738.23	0.09122	0.102179	1.50413e-05
3746.96	0.0910133	0.101947	1.50072e-05
3755.69	0.0908024	0.101711	1.49724e-05
3764.43	0.0905888	0.101472	1.49372e-05
3773.16	0.0903747	0.101232	1.49019e-05
3781.9	0.0901626	0.100994	1.48669e-05
3790.63	0.0899553	0.100762	1.48327e-05
3799.37	0.089755	0.100538	1.47997e-05
3808.1	0.0895635	0.100323	1.47681e-05
3816.83	0.0893819	0.10012	1.47382e-05
3825.57	0.0892111	0.0999283	1.471e-05
3834.3	0.0890508	0.0997487	1.46836e-05
3843.04	0.0889003	0.0995801	1.46588e-05
3851.77	0.0887584	0.0994213	1.46354e-05
3860.5	0.088624	0.0992707	1.46132e-05
3869.24	0.0884955	0.0991268	1.4592e-05
3877.97	0.0883716	0.098988	1.45716e-05
3886.71	0.0882512	0.0988531	1.45517e-05
3895.44	0.0881332	0.0987209	1.45323e-05
3904.18	0.088017	0.0985907	1.45131e-05
3912.91	0.0879019	0.0984619	1.44941e-05
3921.64	0.0877873	0.0983335	1.44753e-05
3930.38	0.0876727	0.098205	1.44563e-05
3939.11	0.0875575	0.0980761	1.44374e-05
3947.85	0.0874415	0.0979461	1.44182e-05
3956.58	0.0873242	0.0978148	1.43989e-05
3965.31	0.0872056	0.0976819	1.43793e-05
3974.05	0.0870853	0.0975472	1.43595e-05
3982.78	0.0869639	0.0974112	1.43395e-05
3991.52	0.0868418	0.0972743	1.43193e-05
4000.25	0.0867193	0.0971372	1.42991e-05
4008.99	0.0865972	0.0970004	1.4279e-05
4017.72	0.0864764	0.096865	1.42591e-05
4026.45	0.0863574	0.0967318	1.42395e-05
4035.19	0.0862408	0.0966011	1.42202e-05
4043.92	0.0861264	0.0964731	1.42014e-05
4052.66	0.0860146	0.0963478	1.41829e-05
4061.39	0.0859049	0.0962249	1.41649e-05
4070.12	0.0857969	0.0961039	1.4147e-05
4078.86	0.0856896	0.0959837	1.41294e-05
4087.59	0.0855822	0.0958635	1.41117e-05
4096.33	0.0854739	0.0957422	1.40938e-05
4105.06	0.0853639	0.0956189	1.40757e-05
4113.8	0.0852516	0.0954931	1.40571e-05
4122.53	0.0851369	0.0953646	1.40382e-05
4131.26	0.0850198	0.0952335	1.40189e-05
4140	0.0849006	0.0950999	1.39993e-05
4148.73	0.0847797	0.0949646	1.39793e-05
4157.47	0.0846578	0.0948281	1.39592e-05
4166.2	0.0845357	0.0946913	1.39391e-05
4174.93	0.0844143	0.0945553	1.39191e-05
4183.67	0.0842944	0.0944209	1.38993e-05
4192.4	0.0841765	0.0942889	1.38799e-05
4201.14	0.0840613	0.0941598	1.38609e-05
4209.87	0.0839489	0.094034	1.38423e-05
4218.61	0.0838394	0.0939113	1.38243e-05
4227.34	0.0837326	0.0937916	1.38067e-05
4236.07	0.0836281	0.0936746	1.37894e-05
4244.81	0.0835254	0.0935595	1.37725e-05
4253.54	0.0834239	0.0934459	1.37558e-05
4262.28	0.0833232	0.0933331	1.37392e-05
4271.01	0.083223	0.0932209	1.37226e-05
4279.74	0.0831231	0.093109	1.37062e-05
4288.48	0.0830235	0.0929974	1.36898e-05
4297.21	0.0829246	0.0928866	1.36734e-05
4305.95	0.0828269	0.0927772	1.36573e-05
4314.68	0.082731	0.0926698	1.36415e-05
4323.42	0.0826378	0.0925654	1.36261e-05
4332.15	0.0825479	0.0924647	1.36113e-05
4340.88	0.082462	0.0923684	1.35972e-05
4349.62	0.0823803	0.0922769	1.35837e-05
4358.35	0.0823027	0.09219	1.35709e-05
4367.09	0.0822288	0.0921072	1.35587e-05
4375.82	0.0821581	0.0920281	1.35471e-05
4384.56	0.0820898	0.0919515	1.35358e-05
4393.29	0.0820228	0.0918765	1.35247e-05
4402.02	0.0819562	0.0918019	1.35138e-05
4410.76	0.081889	0.0917266	1.35027e-05
4419.49	0.0818205	0.0916499	1.34914e-05
4428.23	0.0817502	0.0915711	1.34798e-05
4436.96	0.0816778	0.09149	1.34679e-05
4445.69	0.0816034	0.0914067	1.34556e-05
4454.43	0.081527	0.0913211	1.3443e-05
4463.16	0.0814489	0.0912336	1.34301e-05
4471.9	0.0813692	0.0911444	1.3417e-05
4480.63	0.0812881	0.0910535	1.34036e-05
4489.37	0.0812056	0.0909611	1.339e-05
4498.1	0.0811218	0.0908672	1.33762e-05
4506.83	0.0810363	0.0907715	1.33621e-05
4515.57	0.0809493	0.090674	1.33477e-05
4524.3	0.0808604	0.0905745	1.33331e-05
4533.04	0.0807697	0.0904728	1.33181e-05
4541.77	0.0806772	0.0903692	1.33029e-05
4550.5	0.0805832	0.090264	1.32874e-05
4559.24	0.080488	0.0901573	1.32717e-05
4567.97	0.0803919	0.0900497	1.32558e-05
4576.71	0.0802954	0.0899415	1.32399e-05
4585.44	0.0801986	0.0898331	1.32239e-05
4594.18	0.0801018	0.0897246	1.3208e-05
4602.91	0.080005	0.0896162	1.3192e-05
4611.64	0.0799082	0.0895078	1.31761e-05
4620.38	0.0798112	0.0893992	1.31601e-05
4629.11	0.0797137	0.08929	1.3144e-05
4637.85	0.0796158	0.0891803	1.31279e-05
4646.58	0.0795176	0.0890703	1.31117e-05
4655.31	0.0794194	0.0889603	1.30955e-05
4664.05	0.0793216	0.0888508	1.30793e-05
4672.78	0.079225	0.0887426	1.30634e-05
4681.52	0.0791304	0.0886366	1.30478e-05
4690.25	0.0790385	0.0885337	1.30327e-05
4698.99	0.0789503	0.0884348	1.30181e-05
4707.72	0.0788662	0.0883407	1.30043e-05
4716.45	0.0787866	0.0882515	1.29911e-05
4725.19	0.0787112	0.088167	1.29787e-05
4733.92	0.0786396	0.0880868	1.29669e-05
4742.66	0.0785712	0.0880102	1.29556e-05
4751.39	0.0785049	0.0879359	1.29447e-05
4760.12	0.0784398	0.087863	1.29339e-05
4768.86	0.0783749	0.0877904	1.29232e-05
4777.59	0.0783095	0.0877171	1.29125e-05
4786.33	0.0782431	0.0876427	1.29015e-05
4795.06	0.0781755	0.087567	1.28904e-05
4803.8	0.0781069	0.0874901	1.2879e-05
4812.53	0.0780376	0.0874125	1.28676e-05
4821.26	0.077968	0.0873346	1.28561e-05
4830	0.077899	0.0872573	1.28448e-05
4838.73	0.0778312	0.0871813	1.28336e-05
4847.47	0.0777651	0.0871072	1.28227e-05
4856.2	0.077701	0.0870354	1.28121e-05
4864.93	0.0776391	0.0869661	1.28019e-05
4873.67	0.0775795	0.0868994	1.27921e-05
4882.4	0.0775223	0.0868354	1.27827e-05
4891.14	0.0774674	0.0867738	1.27736e-05
4899.87	0.0774146	0.0867147	1.27649e-05
4908.61	0.0773639	0.0866579	1.27565e-05
4917.34	0.0773153	0.0866034	1.27485e-05
4926.07	0.0772687	0.0865512	1.27408e-05
4934.81	0.0772241	0.0865013	1.27335e-05
4943.54	0.0771815	0.0864535	1.27265e-05
4952.28	0.0771406	0.0864078	1.27197e-05
4961.01	0.0771014	0.0863639	1.27133e-05
4969.74	0.0770633	0.0863212	1.2707e-05
4978.48	0.0770258	0.0862792	1.27008e-05
4987.21	0.0769882	0.0862371	1.26946e-05
4995.95	0.07695	0.0861943	1.26883e-05
5004.68	0.0769106	0.0861502	1.26818e-05
5013.42	0.0768696	0.0861042	1.2675e-05
5022.15	0.0768268	0.0860562	1.2668e-05
5030.88	0.0767822	0.0860063	1.26606e-05
5039.62	0.0767363	0.0859548	1.2653e-05
5048.35	0.0766894	0.0859024	1.26453e-05
5057.09	0.0766424	0.0858497	1.26376e-05
5065.82	0.076596	0.0857977	1.26299e-05
5074.55	0.0765508	0.0857471	1.26225e-05
5083.29	0.0765076	0.0856987	1.26153e-05
5092.02	0.0764667	0.0856529	1.26086e-05
5100.76	0.0764285	0.0856101	1.26023e-05
5109.49	0.0763928	0.0855701	1.25964e-05
5118.23	0.0763594	0.0855326	1.25909e-05
5126.96	0.0763277	0.0854972	1.25857e-05
5135.69	0.0762973	0.0854631	1.25807e-05
5144.43	0.0762675	0.0854297	1.25757e-05
5153.16	0.0762377	0.0853964	1.25708e-05
5161.9	0.0762078	0.0853628	1.25659e-05
5170.63	0.0761772	0.0853286	1.25609e-05
5179.36	0.076146	0.0852937	1.25557e-05
5188.1	0.0761142	0.085258	1.25505e-05
5196.83	0.0760818	0.0852217	1.25451e-05
5205.57	0.0760491	0.0851851	1.25397e-05
5214.3	0.0760164	0.0851485	1.25344e-05
5223.04	0.075984	0.0851122	1.2529e-05
5231.77	0.075952	0.0850764	1.25237e-05
5240.5	0.0759204	0.085041	1.25185e-05
5249.24	0.0758894	0.0850062	1.25134e-05
5257.97	0.0758587	0.0849719	1.25083e-05
5266.71	0.0758286	0.0849381	1.25034e-05
5275.44	0.0757988	0.0849047	1.24985e-05
5284.17	0.0757693	0.0848717	1.24936e-05
5292.91	0.0757402	0.0848391	1.24888e-05
5301.64	0.0757115	0.084807	1.24841e-05
5310.38	0.0756833	0.0847754	1.24794e-05
5319.11	0.0756558	0.0847446	1.24749e-05
5327.85	0.0756292	0.0847147	1.24705e-05
5336.58	0.0756035	0.0846859	1.24663e-05
5345.31	0.0755786	0.0846582	1.24622e-05
5354.05	0.0755548	0.0846314	1.24582e-05
5362.78	0.0755316	0.0846054	1.24544e-05
5371.52	0.075509	0.0845801	1.24507e-05
5380.25	0.0754868	0.0845552	1.2447e-05
5388.98	0.0754647	0.0845305	1.24434e-05
5397.72	0.0754425	0.0845056	1.24397e-05
5406.45	0.07542	0.0844804	1.2436e-05
5415.19	0.0753971	0.0844548	1.24322e-05
5423.92	0.0753738	0.0844287	1.24284e-05
5432.66	0.0753501	0.0844021	1.24245e-05
5441.39	0.0753261	0.0843752	1.24205e-05
5450.12	0.0753018	0.084348	1.24165e-05
5458.86	0.0752773	0.0843206	1.24125e-05
5467.59	0.0752528	0.0842931	1.24084e-05
5476.33	0.0752281	0.0842655	1.24044e-05
5485.06	0.0752032	0.0842376	1.24003e-05
5493.8	0.075178	0.0842094	1.23961e-05
5502.53	0.0751523	0.0841806	1.23919e-05
5511.26	0.0751261	0.0841512	1.23875e-05
5520	0.0750992	0.0841211	1.23831e-05
5528.73	0.0750717	0.0840903	1.23786e-05
5537.47	0.0750436	0.0840588	1.23739e-05
5546.2	0.0750149	0.0840267	1.23692e-05
5554.93	0.0749859	0.0839942	1.23644e-05
5563.67	0.0749569	0.0839617	1.23596e-05
5572.4	0.074928	0.0839294	1.23549e-05
5581.14	0.0748995	0.0838975	1.23502e-05
5589.87	0.0748714	0.0838659	1.23455e-05
5598.61	0.0748437	0.0838349	1.2341e-05
5607.34	0.0748164	0.0838043	1.23365e-05
5616.07	0.0747892	0.0837739	1.2332e-05
5624.81	0.074762	0.0837434	1.23275e-05
5633.54	0.0747345	0.0837126	1.2323e-05
5642.28	0.0747064	0.0836811	1.23183e-05
5651.01	0.0746776	0.0836488	1.23136e-05
5659.74	0.0746479	0.0836156	1.23087e-05
5668.48	0.0746174	0.0835814	1.23037e-05
5677.21	0.0745861	0.0835463	1.22985e-05
5685.95	0.0745541	0.0835105	1.22932e-05
5694.68	0.0745217	0.0834742	1.22879e-05
5703.42	0.0744889	0.0834375	1.22825e-05
5712.15	0.0744559	0.0834006	1.2277e-05
5720.88	0.0744228	0.0833634	1.22716e-05
5729.62	0.0743895	0.0833261	1.22661e-05
5738.35	0.074356	0.0832886	1.22606e-05
5747.09	0.0743221	0.0832507	1.2255e-05
5755.82	0.0742877	0.0832121	1.22493e-05
5764.55	0.0742527	0.0831729	1.22435e-05
5773.29	0.0742169	0.0831329	1.22376e-05
5782.02	0.0741806	0.0830921	1.22316e-05
5790.76	0.0741436	0.0830507	1.22255e-05
5799.49	0.0741061	0.0830087	1.22194e-05
5808.23	0.0740684	0.0829665	1.22131e-05
5816.96	0.0740306	0.0829241	1.22069e-05
5825.69	0.0739929	0.0828819	1.22007e-05
5834.43	0.0739554	0.0828399	1.21945e-05
5843.16	0.0739182	0.0827982	1.21884e-05
5851.9	0.0738812	0.0827568	1.21823e-05
5860.63	0.0738446	0.0827157	1.21762e-05
5869.36	0.0738081	0.0826749	1.21702e-05
5878.1	0.0737718	0.0826342	1.21642e-05
5886.83	0.0737356	0.0825937	1.21583e-05
5895.57	0.0736997	0.0825534	1.21523e-05
5904.3	0.0736642	0.0825137	1.21465e-05
5913.04	0.0736293	0.0824746	1.21407e-05
5921.77	0.0735953	0.0824366	1.21351e-05
5930.5	0.0735626	0.0824	1.21297e-05
5939.24	0.0735315	0.0823651	1.21246e-05
5947.97	0.0735021	0.0823321	1.21198e-05
5956.71	0.0734745	0.0823013	1.21152e-05
5965.44	0.0734488	0.0822725	1.2111e-05
5974.17	0.0734248	0.0822456	1.2107e-05
5982.91	0.0734023	0.0822203	1.21033e-05
5991.64	0.0733809	0.0821964	1.20998e-05
6000.38	0.0733603	0.0821733	1.20964e-05
6009.11	0.0733402	0.0821508	1.20931e-05
6017.85	0.0733203	0.0821285	1.20898e-05
6026.58	0.0733006	0.0821064	1.20865e-05
6035.31	0.0732808	0.0820842	1.20833e-05
6044.05	0.073261	0.0820621	1.208e-05
6052.78	0.0732413	0.0820401	1.20768e-05
6061.52	0.0732219	0.0820183	1.20736e-05
6070.25	0.0732028	0.0819969	1.20704e-05
6078.98	0.0731842	0.081976	1.20673e-05
6087.72	0.073166	0.0819557	1.20643e-05
6096.45	0.0731483	0.0819359	1.20614e-05
6105.19	0.0731309	0.0819164	1.20586e-05
6113.92	0.0731138	0.0818972	1.20557e-05
6122.66	0.0730969	0.0818782	1.20529e-05
6131.39	0.07308	0.0818593	1.20502e-05
6140.12	0.073063	0.0818403	1.20474e-05
6148.86	0.0730461	0.0818213	1.20446e-05
6157.59	0.0730291	0.0818024	1.20418e-05
6166.33	0.0730124	0.0817836	1.2039e-05
6175.06	0.0729958	0.0817651	1.20363e-05
6183.79	0.0729797	0.081747	1.20336e-05
6192.53	0.0729641	0.0817295	1.2031e-05
6201.26	0.0729489	0.0817125	1.20285e-05
6210	0.0729343	0.0816961	1.20261e-05
6218.73	0.0729201	0.0816802	1.20238e-05
6227.47	0.0729062	0.0816647	1.20215e-05
6236.2	0.0728926	0.0816494	1.20193e-05
6244.93	0.0728789	0.0816341	1.2017e-05
6253.67	0.0728652	0.0816188	1.20148e-05
6262.4	0.0728514	0.0816033	1.20125e-05
6271.14	0.0728375	0.0815877	1.20102e-05
6279.87	0.0728235	0.081572	1.20079e-05
6288.6	0.0728094	0.0815562	1.20055e-05
6297.34	0.0727955	0.0815406	1.20032e-05
6306.07	0.0727818	0.0815253	1.2001e-05
6314.81	0.0727685	0.0815104	1.19988e-05
6323.54	0.0727556	0.081496	1.19967e-05
6332.28	0.0727432	0.0814821	1.19946e-05
6341.01	0.0727313	0.0814688	1.19927e-05
6349.74	0.0727198	0.0814559	1.19908e-05
6358.48	0.0727087	0.0814434	1.19889e-05
6367.21	0.0726979	0.0814313	1.19872e-05
6375.95	0.0726872	0.0814194	1.19854e-05
6384.68	0.0726767	0.0814076	1.19837e-05
6393.41	0.0726662	0.0813958	1.19819e-05
6402.15	0.0726558	0.0813841	1.19802e-05
6410.88	0.0726453	0.0813725	1.19785e-05
6419.62	0.072635	0.0813609	1.19768e-05
6428.35	0.0726248	0.0813494	1.19751e-05
6437.09	0.0726146	0.0813381	1.19734e-05
6445.82	0.0726047	0.0813269	1.19718e-05
6454.55	0.0725949	0.0813159	1.19702e-05
6463.29	0.0725852	0.0813051	1.19686e-05
6472.02	0.0725757	0.0812944	1.1967e-05
6480.76	0.0725663	0.0812839	1.19655e-05
6489.49	0.0725569	0.0812734	1.19639e-05
6498.22	0.0725476	0.081263	1.19624e-05
6506.96	0.0725383	0.0812526	1.19608e-05
6515.69	0.072529	0.0812421	1.19593e-05
6524.43	0.0725195	0.0812315	1.19577e-05
6533.16	0.07251	0.0812209	1.19562e-05
6541.9	0.0725004	0.0812101	1.19546e-05
6550.63	0.0724907	0.0811992	1.1953e-05
6559.36	0.0724808	0.0811882	1.19514e-05
6568.1	0.0724708	0.081177	1.19497e-05
6576.83	0.0724607	0.0811656	1.1948e-05
6585.57	0.0724504	0.0811541	1.19463e-05
6594.3	0.07244	0.0811425	1.19446e-05
6603.04	0.0724296	0.0811307	1.19429e-05
6611.77	0.072419	0.0811189	1.19412e-05
6620.5	0.0724082	0.0811069	1.19394e-05
6629.24	0.0723974	0.0810948	1.19376e-05
6637.97	0.0723865	0.0810825	1.19358e-05
6646.71	0.0723753	0.08107	1.1934e-05
6655.44	0.0723639	0.0810572	1.19321e-05
6664.17	0.0723522	0.0810441	1.19302e-05
6672.91	0.0723402	0.0810306	1.19282e-05
6681.64	0.0723277	0.0810167	1.19261e-05
6690.38	0.0723148	0.0810022	1.1924e-05
6699.11	0.0723014	0.0809872	1.19218e-05
6707.85	0.0722875	0.0809716	1.19195e-05
6716.58	0.0722731	0.0809555	1.19171e-05
6725.31	0.0722583	0.0809389	1.19147e-05
6734.05	0.0722431	0.0809219	1.19122e-05
6742.78	0.0722276	0.0809045	1.19096e-05
6751.52	0.0722119	0.0808869	1.1907e-05
6760.25	0.072196	0.0808691	1.19044e-05
6768.98	0.0721801	0.0808513	1.19018e-05
6777.72	0.0721642	0.0808335	1.18992e-05
6786.45	0.0721483	0.0808158	1.18965e-05
6795.19	0.0721326	0.0807981	1.18939e-05
6803.92	0.0721171	0.0807807	1.18914e-05
6812.66	0.0721018	0.0807636	1.18889e-05
6821.39	0.0720868	0.0807468	1.18864e-05
6830.12	0.0720721	0.0807303	1.1884e-05
6838.86	0.0720577	0.0807142	1.18816e-05
6847.59	0.0720437	0.0806985	1.18793e-05
6856.33	0.0720302	0.0806834	1.18771e-05
6865.06	0.0720171	0.0806687	1.18749e-05
6873.79	0.0720044	0.0806546	1.18728e-05
6882.53	0.0719922	0.0806409	1.18708e-05
6891.26	0.0719804	0.0806277	1.18689e-05
6900	0.0719689	0.0806148	1.1867e-05
6908.73	0.0719576	0.0806021	1.18651e-05
6917.47	0.0719464	0.0805895	1.18632e-05
6926.2	0.0719352	0.080577	1.18614e-05
6934.93	0.071924	0.0805645	1.18596e-05
6943.67	0.0719129	0.080552	1.18577e-05
6952.4	0.0719017	0.0805395	1.18559e-05
6961.14	0.0718906	0.080527	1.1854e-05
6969.87	0.0718793	0.0805144	1.18522e-05
6978.6	0.071868	0.0805017	1.18503e-05
